# Supplementary material for: Hummingbird Study: a study protocol for a multicentre exploratory trial to assess the acceptance and performance of a digital medicine system in adults with schizophrenia, schizoaffective disorder or first-episode psychosis
Source: PubMed Central journal article supplement — BMJ Open. 2019 Jun 27;9(6):e025952. doi: 10.1136/bmjopen-2018-025952 (PMC6609081; doi:10.1136/bmjopen-2018-025952), 2019-06-27
Supplement: bmjopen-2018-025952.draft_revisions.pdf [file bmjopen-2018-025952.draft_revisions.pdf]

# BMJ Open

BMJ Open is committed to open peer review. As part of this commitment we make the peer review history of every article we publish publicly available.

When an article is published we post the peer reviewers' comments and the authors' responses online. We also post the versions of the paper that were used during peer review. These are the versions that the peer review comments apply to.

The versions of the paper that follow are the versions that were submitted during the peer review process. They are not the versions of record or the final published versions. They should not be cited or distributed as the published version of this manuscript.

BMJ Open is an open access journal and the full, final, typeset and author-corrected version of record of the manuscript is available on our site with no access controls, subscription charges or pay-per-view fees (<http://bmjopen.bmj.com>).

If you have any questions on BMJ Open's open peer review process please email [info.bmjopen@bmj.com](mailto:info.bmjopen@bmj.com)

# BMJ Open

## A Study Protocol for the Hummingbird Study, an Open-label, Multicenter Exploratory Trial to Assess the Acceptance and Performance of a Digital Medicine System in Adults With Schizophrenia, Schizoaffective Disorder, or First-Episode Psychosis

|                               |                                                                                                                                                                                                                                                                                                                                                                                                                                                                                      |
|-------------------------------|--------------------------------------------------------------------------------------------------------------------------------------------------------------------------------------------------------------------------------------------------------------------------------------------------------------------------------------------------------------------------------------------------------------------------------------------------------------------------------------|
| Journal:                      | <i>BMJ Open</i>                                                                                                                                                                                                                                                                                                                                                                                                                                                                      |
| Manuscript ID                 | bmjopen-2018-025952                                                                                                                                                                                                                                                                                                                                                                                                                                                                  |
| Article Type:                 | Protocol                                                                                                                                                                                                                                                                                                                                                                                                                                                                             |
| Date Submitted by the Author: | 13-Aug-2018                                                                                                                                                                                                                                                                                                                                                                                                                                                                          |
| Complete List of Authors:     | Fowler, J.; Otsuka Pharmaceutical Development & Commercialization, Inc., Cope, Nathan; Otsuka Pharmaceutical Europe Ltd. Knights, Jonathan; Otsuka Pharmaceutical Development & Commercialization, Inc. Phiri, Peter; Southern Health NHS Foundation Trust Makin, Andrew; Otsuka Europe Development and Commercialisation Ltd. Peters-Strickland, Tim; Otsuka Pharmaceutical Development & Commercialization, Inc. Rathod, Shanaya; Southern Health NHS Foundation Trust, Psychiatry |
| Keywords:                     | Coproduction, digital medicine, schizoaffective disorder, schizophrenia                                                                                                                                                                                                                                                                                                                                                                                                              |
|                               |                                                                                                                                                                                                                                                                                                                                                                                                                                                                                      |

SCHOLARONE™  
Manuscripts

1  
2  
3 **A Study Protocol for the Hummingbird Study, an Open-label, Multicenter**  
4  
5  
6 **Exploratory Trial to Assess the Acceptance and Performance of a Digital**  
7  
8 **Medicine System in Adults With Schizophrenia, Schizoaffective Disorder, or**  
9  
10  
11 **First-Episode Psychosis**  
12  
13  
14  
15

16 Running title: Study protocol for DMS use in schizophrenia in the UK  
17  
18  
19

20 Authors:

21  
22 J. Corey Fowler, PhD,<sup>1</sup> Nathan Cope, PhD,<sup>2</sup> Jonathan Knights, PhD,<sup>1</sup> Peter Phiri, PhD,<sup>3</sup> Andrew  
23 Makin, MD,<sup>4</sup> Tim Peters-Strickland, MD,<sup>1</sup> Shanaya Rathod, DM, MRCPsych<sup>3</sup>  
24  
25

26  
27 Affiliations:

28  
29 <sup>1</sup>Otsuka Pharmaceutical Development & Commercialization, Inc., Princeton, NJ, USA; <sup>2</sup>Otsuka  
30 Pharmaceutical Europe Ltd., Wexham, UK; <sup>3</sup>Southern Health NHS Foundation Trust,  
31 Southampton, UK; <sup>4</sup>Otsuka Europe Development and Commercialisation Ltd., Wexham, UK  
32  
33  
34

35  
36 E-mail addresses:

37 [corey.fowler@otsuka-us.com](mailto:corey.fowler@otsuka-us.com), [NCope@otsuka-europe.com](mailto:NCope@otsuka-europe.com), [Jonathan.Knights@otsuka-us.com](mailto:Jonathan.Knights@otsuka-us.com),  
38 [Peter.Phiri@southernhealth.nhs.uk](mailto:Peter.Phiri@southernhealth.nhs.uk), [AMakin@otsuka-europe.com](mailto:AMakin@otsuka-europe.com), [tim.peters-strickland@otsuka-](mailto:tim.peters-strickland@otsuka-us.com)  
39 [us.com](mailto:tim.peters-strickland@otsuka-us.com), [shanayarathod@nhs.net](mailto:shanayarathod@nhs.net)  
40  
41  
42  
43

44 Address correspondence to: J. Corey Fowler, PhD

45  
46 [corey.fowler@otsuka-us.com](mailto:corey.fowler@otsuka-us.com)

47 Associate Director, Global Clinical Development

48 Otsuka Pharmaceutical Development & Commercialization, Inc.

49 508 Carnegie Center Blvd, Suite 300

50 Princeton, NJ 08540, USA

51 +1 919 475 4823  
52  
53  
54  
55  
56  
57  
58  
59  
60

1  
2  
3  
4  
5 Word count (max 4000 for BMJ Open): 3059 (Intro through conclusion, not including table)

6 Table count: 1

7  
8 Figure count: 3 (+5 supplemental)

9  
10 Reference count: 31  
11  
12  
13  
14  
15  
16  
17  
18  
19  
20  
21  
22  
23  
24  
25  
26  
27  
28  
29  
30  
31  
32  
33  
34  
35  
36  
37  
38  
39  
40  
41  
42  
43  
44  
45  
46  
47  
48  
49  
50  
51  
52  
53  
54  
55  
56  
57  
58  
59  
60

For peer review only

## ABSTRACT FOR PROTOCOL

Introduction: In patients with schizophrenia, medication adherence is important for relapse prevention, and effective adherence monitoring is essential for treatment planning. Digital technology has shown success in schizophrenia assessment and treatment. A digital medicine system (DMS) has been developed to objectively monitor patient adherence and support clinical decision making regarding treatment choices. This study's objective is to assess the acceptance and performance of the DMS in adults with schizophrenia, schizoaffective disorder, or first-episode psychosis and in healthcare professionals (HCPs) in the United Kingdom.

Methods and Analysis: This is a multicenter, 8-week, single-arm, open-label pragmatic trial designed using coproduction methodology. The study will be conducted at 5 National Health Service Foundation Trusts in the United Kingdom. Patients 18 to 65 years old with a diagnosis of schizophrenia, schizoaffective disorder, or first-episode psychosis will be eligible. HCPs (psychiatrists, care coordinators, nurses, pharmacists) researchers, information governance personnel, commissioners, and patients participated in study design and coproduction. The DMS is an integrated system comprising an oral sensor tablet co-encapsulated with an antipsychotic, nonmedicated wearable patch, mobile application (app), and Web-based dashboard. The co-encapsulation product contains aripiprazole, olanzapine, quetiapine, or risperidone, as prescribed by the HCP, with a miniature ingestible event marker (IEM) in tablet. Upon ingestion, the IEM transmits a signal to the patch, which collects ingestion and physical activity data for processing on the patient's smartphone or tablet before transmission to a cloud-based server for viewing by patients, caregivers, and HCPs on secure web portals or mobile apps. Primary and secondary

1  
2  
3 endpoints will be the proportion of days with good patch coverage and ingestion adherence,  
4  
5 respectively.  
6  
7  
8  
9

10 Ethics and Dissemination: Approval for this study was obtained from London - City & East  
11 Research Ethics Committee. Results will be disseminated through peer-reviewed publications,  
12  
13 conference presentations, clinical trial repositories, and communications with participants.  
14  
15  
16  
17  
18

19 ClinicalTrials.gov: NCT03568500  
20  
21  
22  
23

## 24 **Keywords**

25 Coproduction, digital medicine, schizoaffective disorder, schizophrenia  
26  
27  
28  
29

## 30 **STRENGTHS AND LIMITATIONS OF THIS STUDY**

- 31  
32  
33 • This study was codeveloped with input from clinical practitioners, researchers, patients,  
34 caregivers, service managers, information governance teams, and clinical commissioning  
35 groups to obtain information that will best serve all those involved in the treatment and  
36 care of patients with schizophrenia, schizoaffective disorder, and first-episode psychosis.  
37  
38  
39
- 40  
41  
42 • The digital medicine system (DMS) uses an integrated, user-friendly system to provide  
43 objective feedback on patient medication adherence and physical health parameters, such  
44 as activity and rest levels, as well as voluntary subjective entries regarding mood and rest  
45 quality, to help support treatment decisions and evaluation.  
46  
47  
48
- 49  
50  
51 • Information from the DMS is made readily available to patients, caregivers (with the  
52 patient's consent), and physicians to support clinical decision making, proactive  
53 intervention, and individualized care in near to real time.  
54  
55  
56  
57  
58  
59  
60

- 1  
2  
3  
4  
5  
6  
7  
8  
9  
10  
11  
12  
13  
14  
15  
16  
17  
18  
19  
20  
21  
22  
23  
24  
25  
26  
27  
28  
29  
30  
31  
32  
33  
34  
35  
36  
37  
38  
39  
40  
41  
42  
43  
44  
45  
46  
47  
48  
49  
50  
51  
52  
53  
54  
55  
56  
57  
58  
59  
60
- Possible limitations of this study are the small sample size (N=60), limited generalizability to the broader pool of UK mental health patients and providers, and the relatively short 12-week timeframe.

For peer review only

## INTRODUCTION

Schizophrenia has an enormous social and economic burden worldwide, accounting for 1.1% of total disability-adjusted life-years and 2.7% of years lived with disability [1, 2]. In Europe, the economic impact of schizophrenia and other psychotic disorders and syndromes in 2010 was estimated at €93.9 billion [3]. Because it is a chronic disease, maintenance treatment is often necessary to prevent relapse and preserve quality of life over the long term [4, 5]. Although antipsychotic medications are effective [6-8], poor insight into schizophrenia can increase risk of medication nonadherence [9, 10]. In patients with schizophrenia, the rate of nonadherence to prescribed antipsychotics has been reported to be as high as 74% [11]. Not only is medication nonadherence burdensome to patients and their families, it also increases the likelihood of rehospitalization and relapse [12] and contributes substantially to healthcare costs [13]. In 2005/2006, mean annual psychiatric inpatient and medication costs for patients with schizophrenia in England were estimated to be approximately £3,000 and £2,000 per patient, respectively [14].

Because medication adherence is important to relapse prevention in schizophrenia [15], effective adherence monitoring is an essential part of the treatment plan. Although there are various subjective methods for determining medication adherence, including patient surveys, adherence diaries, and clinician ratings of patient symptoms and medication side effects, these methods have low validity [16]. Blister packs and electronic medication bottle caps can provide an indicator of pill removal or bottle opening and have been shown to improve adherence [17, 18], but neither technology provides an objective marker of pill ingestion or supports remote monitoring by healthcare professionals (HCPs). Optimal adherence monitoring and support for



1  
2  
3 patients with schizophrenia requires a system that provides physicians with objective information  
4  
5 during interim periods between patient visits.  
6  
7

8 The use of modern technology such as personal digital assistants [19], digital wristwatches [20],  
9  
10 handheld computers [21], and mobile phones [22] to manage schizophrenia has shown success.

11 A digital medicine system (DMS) has been developed as a drug-device combination to  
12  
13 objectively assess and report ingestion of prescription antipsychotics [23]. The DMS has 4 main  
14  
15 components: an ingestible sensor embedded within an inert tablet, a nonmedicated wearable  
16  
17 sensor (patch) worn by the patient, a mobile application (app), and a Web-based dashboard [23].  
18  
19 Upon interaction with stomach fluids, the ingestible sensor is activated and communicates with  
20  
21 the wearable sensor, which sends a signal to a Bluetooth-paired mobile device where it can be  
22  
23 viewed by patients or be subsequently viewed by HCPs and caregivers using secure mobile- and  
24  
25 cloud-based software [23]. The DMS also communicates data on patient activity and rest levels  
26  
27 as well as subjective data on mood and rest quality. The intention of the DMS is to encourage  
28  
29 greater patient self-management and behavior change while enabling caregivers and HCPs to  
30  
31 provide better care and support both within and outside of office visits, further engaging patients  
32  
33 in their ongoing disease management.  
34  
35  
36  
37  
38  
39  
40

41 In an open-label, 8-week study, 78% of patients and 72% of HCPs reported being somewhat  
42  
43 satisfied, satisfied, or extremely satisfied with the DMS [24]. Findings from another open-label  
44  
45 study showed patients to be actively involved in their treatment, with >70% utilizing call centers  
46  
47 for technological DMS support [25]; the rate of ingestion adherence in this study was 85.6%  
48  
49 [25].  
50  
51

52 The DMS from the current study (namely the ingestible sensor and the wearable sensor) are  
53  
54 Conformité Européene (CE)–marked for use in Europe as class IIa medical devices (CE 559373),  
55  
56  
57

1  
2  
3 but studies in European mental health populations have not been performed. Therefore, the  
4  
5 objective of this exploratory study is to assess the acceptance and performance of the DMS  
6  
7 among adult patients with schizophrenia, schizoaffective disorder, or first-episode psychosis and  
8  
9 among HCPs from different care settings in the United Kingdom.  
10  
11  
12  
13

## 14 **METHODS AND ANALYSIS**

### 15 16 17 18 **Study design**

19  
20 This is a multicenter, 8-week, single-arm, open-label trial to evaluate the acceptance and  
21  
22 performance of the DMS in adult patients with schizophrenia, schizoaffective disorder, or first-  
23  
24 episode psychosis on an oral atypical antipsychotic medication (aripiprazole, olanzapine,  
25  
26 quetiapine, or risperidone) and in HCPs. The study will take place at 5 institutions in the United  
27  
28 Kingdom: Northumberland, Tyne and Wear National Health Service (NHS) Foundation Trust,  
29  
30 Surrey and Borders Partnership NHS Foundation Trust, Oxford Health NHS Foundation Trust,  
31  
32 South London and Maudsley NHS Foundation Trust, and Southern Health NHS Foundation  
33  
34 Trust. The first patient's first visit occurred in May 2018. Patient recruitment will be targeted to  
35  
36 last approximately 4 months.  
37  
38  
39  
40  
41

### 42 **Intervention**

43  
44 The DMS is an integrated, 4-component system comprising an oral co-encapsulation (CoE)  
45  
46 pharmacologic sensor tablet, a Proteus<sup>®</sup> Patch, a mobile app, and Otsuka Medical dashboard  
47  
48 software (**Figure 1**). Each CoE product contains an approved antipsychotic medication  
49  
50 (aripiprazole, olanzapine, quetiapine, or risperidone) encapsulated with a miniature ingestible  
51  
52 event marker (IEM) in tablet. HCPs will select the medication and dosage based on each  
53  
54  
55  
56  
57  
58  
59  
60

1  
2  
3 patient's needs. Upon taking the medication, the IEM transmits a signal to the nonmedicated  
4 patch that is attached to the patient's skin. The patch collects IEM ingestion and physical activity  
5 data, which are then processed by the Patch Analytics Block on the patient's smartphone.  
6  
7

8  
9  
10 Processed data are transferred through the app on the smartphone and sent to a cloud-based  
11 server for patient, caregiver, and HCP viewing on Otsuka Medical software through web portals  
12 or mobile apps. Patients will have access to the Otsuka Patient Application, caregivers will have  
13 access (with patient consent) to the Otsuka Caregiver Web Portal, and HCPs will have access to  
14 the Otsuka Healthcare Provider Web Portal.  
15  
16  
17  
18  
19  
20  
21

## 22 **Coproduction and patient involvement**

23  
24  
25 This study was designed using coproduction methodology involving NHS staff and patients  
26 (Figure 2). The lead site, Southern Health NHS Foundation Trust, held 5 coproduction  
27 workshops, and a subset of these workshops was repeated at other study sites to elicit feedback  
28 on the study design. These discussions addressed pharmacy items for the CoE product; HCP  
29 recruitment strategies; and protocols for identification, recruitment, and interactions with suitable  
30 patients and their general practitioners. Throughout the various workshops at the different sites,  
31 participants included clinicians, pharmacists, researchers, information governance personnel,  
32 psychiatrists, care coordinators, nurses, information technology personnel, commissioners, and  
33 patients (Figure 2).  
34  
35  
36  
37  
38  
39  
40  
41  
42  
43  
44  
45

46 After changes from the coproduction workshops were incorporated, the Patient and Public  
47 Involvement and Service User Lead from 2 study sites (Surrey and Borders Partnership NHS  
48 Foundation Trust and Northumberland, Tyne, and Wear NHS Foundation Trust) engaged service  
49 users to participate in a patient focus group. At these focus groups, attendees provided feedback  
50 on the ease of use of, and the ability to perform tasks within, the DMS mobile app (MyCite).  
51  
52  
53  
54  
55  
56  
57  
58  
59  
60

## Patient selection

Patients for this exploratory study will be identified using database searches conducted at each study site per HCP discretion. Inclusion and exclusion criteria are provided in **Table 1**.

**Table 1. Inclusion and Exclusion Criteria**

| Inclusion criteria                                                                                                                                                                                                                                                                                                                                                                                                                                                                                                                                                                                                                                                                                                                                                                                                                                                                                                                                                                                                                                                                                                                                                                                                                                                                                                                                                                                                                                                                                                                                                                                                                                                                 |
|------------------------------------------------------------------------------------------------------------------------------------------------------------------------------------------------------------------------------------------------------------------------------------------------------------------------------------------------------------------------------------------------------------------------------------------------------------------------------------------------------------------------------------------------------------------------------------------------------------------------------------------------------------------------------------------------------------------------------------------------------------------------------------------------------------------------------------------------------------------------------------------------------------------------------------------------------------------------------------------------------------------------------------------------------------------------------------------------------------------------------------------------------------------------------------------------------------------------------------------------------------------------------------------------------------------------------------------------------------------------------------------------------------------------------------------------------------------------------------------------------------------------------------------------------------------------------------------------------------------------------------------------------------------------------------|
| <ul style="list-style-type: none"> <li>● Willing and able to give written informed consent and adhere to trial procedures</li> <li>● Able to read and understand English</li> <li>● Age 18–65 years at the time of informed consent</li> <li>● Possessing a smartphone and able to use it to interact with the digital medicine system (DMS) application <b>through robust and dependable cellular or wireless internet connections</b></li> <li>● Cooperative, able to ingest oral medication, willing to complete aspects of the trial, and capable of reporting adverse events (AEs)</li> <li>● Clinical diagnosis of schizophrenia, schizoaffective disorder (defined by International Classification of Diseases, Tenth Revision, codes F20 and F25), or first-episode psychosis based on case note review</li> <li>● Prescription for aripiprazole, olanzapine, quetiapine, or risperidone</li> <li>● Fulfills <math>\geq 1</math> of the following: <ul style="list-style-type: none"> <li>○ Discharge from a hospital admission (within 7 days of discharge) to an acute intervention team</li> <li>○ Referral to an acute intervention team before hospital admission</li> <li>○ Referral from an acute intervention team to a community team</li> <li>○ Managed by community services</li> <li>○ Inclusion within early intervention caseload (&lt;3 years from initial symptoms)</li> <li>○ Healthcare professional (HCP) determines the patient would benefit</li> </ul> </li> <li>● General medical condition does not pose additional risk</li> <li>● Skin on the anterior chest above the lower edge of the rib cage is free of any dermatologic problem</li> </ul> |
| Exclusion criteria                                                                                                                                                                                                                                                                                                                                                                                                                                                                                                                                                                                                                                                                                                                                                                                                                                                                                                                                                                                                                                                                                                                                                                                                                                                                                                                                                                                                                                                                                                                                                                                                                                                                 |
| <ul style="list-style-type: none"> <li>● Any disorder that may affect patient's ability to participate in the trial or interact with a smartphone</li> <li>● Likely to be incapable of using DMS technology, even with assistance</li> <li>● History or evidence of a medical condition that would expose patient to undue risk of an AE</li> <li>● Known allergy to adhesive tape or any component of the patch or co-encapsulation product</li> <li>● Current incarceration in prison system</li> <li>● Hospitalization at the time of screening due to mental or physical illness</li> <li>● HCP recommendation to not participate</li> <li>● Aversion to taking gelatin capsules</li> </ul>                                                                                                                                                                                                                                                                                                                                                                                                                                                                                                                                                                                                                                                                                                                                                                                                                                                                                                                                                                                    |

- Women who are breastfeeding, pregnant, or plan to become pregnant

## Procedures

The study will comprise 3 phases: a screening phase of up to 7 days, an 8-week assessment phase, and a 2-week safety follow-up (**Figure 3**). Screening and baseline may occur at a single visit or at 2 visits separated by up to 7 days. At the screening/baseline visit, patients providing informed consent will receive patches, CoE product, and other supplies and undergo training by the HCPs on required and correct use of the DMS. HCPs will confirm proper patch application to the skin and pairing of the patch with the smartphone app. Patients will be instructed to wear the patch continuously, replacing it every 7 days or as needed during the assessment period. An integrated call center will be available to patients for technical support regarding use of the DMS.

During the subsequent 8-week assessment period, patients will visit their HCP at weeks 4 and 8 (or at early termination) for clinical evaluation and review of DMS data. At the week 4 visit, patients will also obtain a prescription refill. HCPs will be required to monitor and review DMS data at least every 2 weeks, with the option of requesting additional patient visits as needed. HCPs will also have the ability to modify the patient's treatment plan at their discretion. Safety and tolerability will be assessed on an ongoing basis throughout the assessment period and during the subsequent 2-week safety follow-up, during which time a follow-up telephone call will be made to each study participant.

Healthcare utilization record evaluation will occur continuously beginning at the baseline/screening visit and will span a period ranging from 24 weeks before baseline/screening to 24 weeks after screening. All hospital admissions will be recorded and categorized as

1  
2  
3 “planned,” “unplanned,” “related,” or “unrelated” to psychiatric illness. Characteristics of each  
4 HCP encounter will also be recorded, including the nature of the contact; HCP role; whether the  
5 visit was planned or unplanned; whether or not the contact was initiated as a result of the DMS;  
6 and any medication titration, adherence counseling, education, or lifestyle coaching that  
7 occurred.  
8  
9  
10  
11  
12  
13  
14  
15

## 16 **Outcomes**

17  
18 The primary endpoint is the proportion of days with good patch coverage during the assessment  
19 period, which will be defined as having  $\geq 80\%$  patch data available or IEMs detected within each  
20 day of the assessment period. The secondary endpoint is ingestion adherence, defined as the  
21 proportion of detected IEMs to the total expected IEMs ingested on the assessment days that  
22 showed good patch coverage.  
23  
24  
25  
26  
27  
28  
29

30 The following exploratory endpoints will also be included:  
31

- 32  
33 • The proportion of time during the assessment period that patients wear their patch
- 34  
35 • Engagement and satisfaction of patients, HCPs, and caregivers as determined using the  
36 Subject Usability and Satisfaction Scale (**Supplemental Figure 1**), the Physician Utility  
37 Survey (**Supplemental Figure 2**), and the Caregiver/Support Person Involvement Scale  
38 (**Supplemental Figure 3**)
- 39  
40 • Personal and social functioning as assessed using the Personal and Social Performance  
41 Scale (**Supplemental Figure 4**)
- 42  
43 • Patient activation as assessed using the Patient Activation Measure-Mental Health Scale  
44 (**Supplemental Figure 5**)
- 45  
46 • The proportion of days that patients and HCPs use the app and dashboard, respectively  
47  
48  
49  
50  
51  
52  
53  
54  
55  
56  
57  
58  
59  
60

- The proportion of ingested IEM tablets registered on the digital health data server of the total expected IEM tablets ingested
- Safety variables will include the frequency and severity of serious adverse events and device-related nonserious adverse events, suicidality, and any product quality complaints that may arise. Suicidality will be determined by face-to-face risk assessment according to each study site's standard operating procedure.

### **Statistical analysis**

A sample size of 60 patients was determined based on an anticipated 25% discontinuation rate, such that  $\geq 45$  patients would complete the 8-week assessment period. Data will be analyzed in the intent-to-treat population (ie, all patients who enter the trial and use the DMS). All data will be analyzed using descriptive statistics. Continuous variables will be summarized using mean, median, range, and standard deviation. Categorical variables will be summarized using frequency distributions.

### **Data protection**

Before initiating participation, informed consent will be obtained from all patients and caregivers. Health information will be de-identified to the fullest possible extent. However, some identifiers or sensitive health information cannot be stripped (eg, psychiatric medical history, participation in a care program approach, presence of a community treatment order, employment status, disabilities, housing arrangements, or armed forces history). Health information will be used to develop and improve the DMS application and user experience. The DMS and associated third-party vendors are compliant with the General Data Protection Regulation (GDPR), and all accessed health information will be maintained in the strictest confidence and in compliance with

1  
2  
3 the GDPR. Data from the DMS are encrypted in activity and rest and will be accessed only by  
4 role-specific individuals for discrete time periods and functions (eg, technical troubleshooting).

5  
6 All data will be completely anonymized for graphical, statistical, and publication purposes.  
7

8  
9  
10 Research staff from NHS sites will store consent documents, demographic forms, and receipts  
11 for reimbursement of travel in locked filing cabinets to which only research staff will have  
12 access. Accessing of health data will be compliant with information governance policies of each  
13 participating NHS trust.  
14  
15  
16  
17  
18

## 19 20 21 22 **ETHICS AND DISSEMINATION**

### 23 24 25 **Ethical considerations**

26  
27  
28 Ethics approval for this study was obtained from London - City & East Research Ethics  
29 Committee (REC Ref no. 18/LO/0128), and clinical trial authorization was provided by the  
30 Medicines and Healthcare products Regulatory Agency. Written informed consent will be  
31 obtained from every participant. Ethical issues will be related to the identification and  
32 recruitment of patients, informed consent, and data protection arrangements. The trial will be  
33 conducted in compliance with the International Council for Harmonisation of Technical  
34 Requirements for Pharmaceuticals for Human Use guidelines and Declaration of Helsinki.  
35  
36  
37  
38  
39  
40  
41  
42  
43  
44

### 45 46 **Dissemination of study results**

47  
48 The study results will be disseminated through peer-reviewed publications, national and  
49 international conference presentations, and formal clinical trial repositories (eg,  
50 ClinicalTrials.gov). The 5 participating NHS sites will be invited to a results launch event.  
51  
52 Results will be shared with individuals who participated in the workshops via the respective  
53  
54  
55  
56  
57  
58  
59  
60



1  
2  
3 trusts. Additionally, follow-up workshops are planned to capture further feedback on next steps  
4  
5 for scaling the DMS technology.  
6  
7  
8  
9

## 10 **DISCUSSION**

11  
12 Patient adherence to antipsychotic medication is a crucial component of successful maintenance  
13  
14 therapy for schizophrenia. Knowledge of patient adherence in the absence of positive treatment  
15  
16 outcome is also essential. Subjective means for assessing medication adherence such as clinician  
17  
18 evaluation and patient self-report have low validity [16], and most can only be administered  
19  
20 during patient-HCP visits. Digital medicine offers a means to monitor patient adherence and  
21  
22 obtain objective data throughout treatment, including periods between office visits, which may  
23  
24 yield more accurate data. For example, a study evaluating nonadherence rates for antipsychotic  
25  
26 medication based on electronic medication bottle caps, which report when pill bottles have been  
27  
28 opened [18], showed a 57% nonadherence rate, much higher than that estimated by patient (5%)  
29  
30 and provider (7%) report [18]. This study shows the potential of digital medicine to provide  
31  
32 continuous objective data that can inform and improve patient adherence and assist in clinical  
33  
34 decision making. The DMS improves upon approaches such as electronic medication caps by  
35  
36 providing an objective marker of ingestion and not merely a surrogate in addition to other  
37  
38 objective and subjective data.  
39  
40  
41  
42  
43  
44

45 Patient discontinuation is a considerable problem in studies of digital health technology [26].  
46  
47 Studies of early digital health systems for maintenance and counseling of mental disorders  
48  
49 reported low completion rates. For example, a study evaluating a 12-week web-based cognitive  
50  
51 behavioral therapy intervention for panic disorder had a 1% (12/1161) completion rate [27], and  
52  
53 a study evaluating a publicly accessible 5-module web-based cognitive behavioral therapy  
54  
55  
56  
57  
58  
59  
60

1  
2  
3 program for anxiety and depression had a 0.5% completion rate (97/19,607) [28]. Completion  
4  
5 rates may be particularly low in patients with more severe negative symptoms [22]. Despite these  
6  
7 historically poor completion rates in studies of digital health platforms, results of a meta-analysis  
8  
9 indicate that more than 50% of patients favor managing their mental health through the use of  
10  
11 mobile health technology [29], and the use of mobile devices for health management is viewed  
12  
13 by patients as normalized and nonstigmatizing [30]. The integrated DMS described here was  
14  
15 developed to leverage the advantages of digital technology to positively influence adherence in  
16  
17 patients with schizophrenia.  
18  
19  
20

21  
22 The DMS is a multimodal, user-friendly system that provides medication reminders and  
23  
24 measures patient ingestion of prescribed antipsychotic medications. The CoE product, in  
25  
26 particular, advances the ability to confirm medication ingestion and to assess adherence on a  
27  
28 continuous basis, which can inform whether uncontrolled symptoms may be explained by  
29  
30 nonadherence. Information from the DMS is made readily available to patients, caregivers (with  
31  
32 the patient's consent), and physicians for supported decision making, proactive intervention, and  
33  
34 individualized care. DMS also provides adherence feedback electronically to the patient, HCP,  
35  
36 and/or caregiver. Because it can be implemented discreetly, patients may feel destigmatized and  
37  
38 assimilate back into society more readily. The DMS also provides feedback on activity and rest  
39  
40 levels, which is important given that maintenance of a healthy lifestyle can help address the  
41  
42 problems of weight gain and obesity that are related to both medication side effects and  
43  
44 sedentary lifestyles [31]. Furthermore, shifts in activity levels may be indicative of altered  
45  
46 patient disposition.  
47  
48  
49  
50

51  
52 This ongoing study was designed using coproduction methodology to incorporate input from  
53  
54 patients, caregivers, psychiatrists, pharmacists, nurses, and researchers. For all 5 study sites, a  
55  
56  
57  
58  
59  
60

1  
2  
3 minimum of 2 engagement/setup meetings were conducted and 2 specific patient focus groups  
4  
5 were held to guide protocol development and app design.. The exploratory data collected in this  
6  
7 study, although limited to a small number of patients, will help provide a better understanding of  
8  
9 the ease of use for patients, HCPs, and caregivers to inform the development of future software  
10  
11 or hardware iterations.  
12  
13  
14  
15

## 16 **CONCLUSION**

17  
18  
19 In conclusion, this study will examine the usability and acceptance of the DMS by patients with  
20  
21 schizophrenia, schizoaffective disorder, or first-episode psychosis, and by caregivers and HCPs  
22  
23 in different care settings. The study was meticulously coproduced through the engagement of all  
24  
25 stakeholders and, if successful, could be used to support DMS usage in larger cohorts within the  
26  
27 United Kingdom and Europe.  
28  
29  
30  
31  
32

## 33 **Funding statement**

34  
35 This study is supported by Otsuka Pharmaceutical Development & Commercialization, Inc.  
36  
37 Editorial support for development of this manuscript was provided by Eric Comeau, PhD, at C4  
38  
39 MedSolutions, LLC (Yardley, PA), a CHC Group company, and funded by Otsuka  
40  
41 Pharmaceutical Development & Commercialization, Inc.  
42  
43  
44  
45

## 46 **Competing interests statement**

47  
48  
49 Dr J. Corey Fowler, Dr Jonathan Knights, and Dr Tim Peters-Strickland are employees of Otsuka  
50  
51 Pharmaceutical Development & Commercialization. Dr Nathan Cope is an employee of Otsuka  
52  
53 Pharmaceutical Europe Ltd. Dr Andrew Makin is an employee of Otsuka Europe Development  
54  
55  
56  
57  
58  
59  
60

1  
2  
3 and Commercialisation. Dr Peter Phiri has no conflict of interest. Dr Shanaya Rathod has  
4  
5 received honoraria from Otsuka and Lundbeck for educational sessions.  
6  
7

## 8 **Author contributions**

9

10  
11 JCF, NC, AM, and TPS made substantial contributions to the design and to the conception of the  
12  
13 work. JCF, JK, PP, and SR participated in acquisition of data for the work. JCF, JK, and TPS  
14  
15 participated in analysis of the data for the work. JCF, NC, JK, PP, AM, TPS, and SR participated  
16  
17 in interpretation of the data for the work, provided intellectual contribution to the manuscript,  
18  
19 and approved the final version of the document for submission.  
20  
21  
22  
23

24 The authors thank patient advisers and NHS staff from all 5 participating sites (Oxford Health  
25  
26 NHS Foundation Trust; Northumberland, Tyne and Wear NHS Foundation Trust; Southern  
27  
28 Health NHS Foundation Trust; South London and Maudsley NHS Foundation Trust; and Surrey  
29  
30 and Borders Partnership NHS Foundation Trust) for their contributions to the study  
31  
32 methodology. Editorial support for development of this manuscript was provided by Eric  
33  
34 Comeau at C4 MedSolutions, LLC (Yardley, PA, USA), a CHC Group company, and funded by  
35  
36 Otsuka Pharmaceutical Development & Commercialization, Inc.  
37  
38  
39  
40  
41  
42  
43  
44  
45  
46  
47  
48  
49  
50  
51  
52  
53  
54  
55  
56  
57  
58  
59  
60

## REFERENCES

1. World Health Organization. 2008. The Global Burden of Disease: 2004 update.  
[http://www.who.int/healthinfo/global\\_burden\\_disease/GBD\\_report\\_2004update\\_full.pdf?ua=1](http://www.who.int/healthinfo/global_burden_disease/GBD_report_2004update_full.pdf?ua=1). (accessed June 29, 2018).
2. Rathod S, Garner C, Griffiths A, et al. Protocol for a multicentre study to assess feasibility, acceptability, effectiveness and direct costs of TRIumPH (Treatment and Recovery In Psychosis): integrated care pathway for psychosis. *BMJ Open* 2016;6:e012751. doi:10.1136/bmjopen-2016-012751
3. Gustavsson A, Svensson M, Jacobi F, et al. Cost of disorders of the brain in Europe 2010. *Eur Neuropsychopharmacol* 2011;21:718-79. doi:10.1016/j.euroneuro.2011.08.008
4. Hasan A, Falkai P, Wobrock T, et al. World Federation of Societies of Biological Psychiatry (WFSBP) guidelines for biological treatment of schizophrenia, part 2: update 2012 on the long-term treatment of schizophrenia and management of antipsychotic-induced side effects. *World J Biol Psychiatry* 2013;14:2-44.  
doi:10.3109/15622975.2012.739708
5. Kreyenbuhl J, Dixon LB, McCarthy JF, et al. Does adherence to medications for type 2 diabetes differ between individuals with vs without schizophrenia? *Schizophr Bull* 2010;36:428-35. doi:10.1093/schbul/sbn106
6. Isett KR, Burnam MA, Coleman-Beattie B, et al. The state policy context of implementation issues for evidence-based practices in mental health. *Psychiatr Serv* 2007;58:914-21. doi:10.1176/appi.ps.58.7.914
7. Ismail Z, Peters-Strickland T, Miguelez M, et al. Aripiprazole once-monthly in the treatment of acute psychotic episodes in schizophrenia: post hoc analysis of Positive and

- 1  
2  
3 Negative Syndrome Scale Marder factor scores. *J Clin Psychopharmacol* 2017;37:347-  
4  
5 50. doi:10.1097/JCP.0000000000000710  
6  
7  
8 8. Potkin SG, Loze JY, Forray C, et al. Multidimensional assessment of functional  
9  
10 outcomes in schizophrenia: results from QUALIFY, a head-to-head trial of aripiprazole  
11  
12 once-monthly and paliperidone palmitate. *Int J Neuropsychopharmacol* 2017;20:40-9.  
13  
14 doi:10.1093/ijnp/pyw093  
15  
16  
17 9. Rathod S, Kingdon D, Smith P, et al. Insight into schizophrenia: the effects of cognitive  
18  
19 behavioural therapy on the components of insight and association with  
20  
21 sociodemographics--data on a previously published randomised controlled trial.  
22  
23 *Schizophr Res* 2005;74:211-9. doi:10.1016/j.schres.2004.07.003  
24  
25  
26 10. Sendt KV, Tracy DK, Bhattacharyya S. A systematic review of factors influencing  
27  
28 adherence to antipsychotic medication in schizophrenia-spectrum disorders. *Psychiatry*  
29  
30 *Res* 2015;225:14-30.  
31  
32  
33 11. Lieberman JA, Stroup TS, McEvoy JP, et al. Effectiveness of antipsychotic drugs in  
34  
35 patients with chronic schizophrenia. *N Engl J Med* 2005;353:1209-23.  
36  
37 doi:10.1056/NEJMoa051688  
38  
39  
40 12. Morken G, Widen JH, Grawe RW. Non-adherence to antipsychotic medication, relapse  
41  
42 and rehospitalisation in recent-onset schizophrenia. *BMC Psychiatry* 2008;8:32.  
43  
44  
45 13. Cutler RL, Fernandez-Llimos F, Frommer M, et al. Economic impact of medication non-  
46  
47 adherence by disease groups: a systematic review. *BMJ Open* 2018;8:e016982.  
48  
49 doi:10.1136/bmjopen-2017-016982  
50  
51  
52 14. McCrone P, Dhanasiri S, Patel A, et al. Paying the Price: The Cost of Mental Health Care  
53  
54 in England to 2026. London: King's Fund 2008.  
55  
56  
57  
58  
59  
60

- 1  
2  
3 15. Gray R, Bressington D, Ivanecka A, et al. Is adherence therapy an effective adjunct  
4 treatment for patients with schizophrenia spectrum disorders? A systematic review and  
5 meta-analysis. *BMC Psychiatry* 2016;16:90. doi:10.1186/s12888-016-0801-1  
6  
7
- 8  
9  
10 16. Haddad PM, Brain C, Scott J. Nonadherence with antipsychotic medication in  
11 schizophrenia: challenges and management strategies. *Patient Relat Outcome Meas*  
12 2014;5:43-62. doi:10.2147/PROM.S42735  
13  
14
- 15  
16  
17 17. Gutierrez PM, Wortzel HS, Forster JE, et al. Blister packaging medication increases  
18 treatment adherence in psychiatric patients. *J Psychiatr Pract* 2017;23:320-7.  
19  
20
- 21  
22 18. Byerly MJ, Thompson A, Carmody T, et al. Validity of electronically monitored  
23 medication adherence and conventional adherence measures in schizophrenia. *Psychiatr*  
24 *Serv* 2007;58:844-7.  
25  
26
- 27  
28 19. Ben-Zeev D, McHugo GJ, Xie H, et al. Comparing retrospective reports to real-time/real-  
29 place mobile assessments in individuals with schizophrenia and a nonclinical comparison  
30 group. *Schizophr Bull* 2012;38:396-404. doi:10.1093/schbul/sbr171  
31  
32
- 33  
34  
35 20. Oorschot M, Lataster T, Thewissen V, et al. Mobile assessment in schizophrenia: a data-  
36 driven momentary approach. *Schizophr Bull* 2012;38:405-13. doi:10.1093/schbul/sbr166  
37  
38
- 39  
40 21. Kimhy D, Delespaul P, Corcoran C, et al. Computerized experience sampling method  
41 (ESMc): assessing feasibility and validity among individuals with schizophrenia. *J*  
42 *Psychiatr Res* 2006;40:221-30. doi:10.1016/j.jpsychires.2005.09.007  
43  
44
- 45  
46  
47 22. Granholm E, Ben-Zeev D, Link PC, et al. Mobile Assessment and Treatment for  
48 Schizophrenia (MATS): a pilot trial of an interactive text-messaging intervention for  
49 medication adherence, socialization, and auditory hallucinations. *Schizophr Bull*  
50 2012;38:414-25.  
51  
52  
53  
54  
55  
56  
57  
58  
59  
60

- 1  
2  
3 23. Rohatagi S, Profit D, Hatch A, et al. Optimization of a digital medicine system in  
4 psychiatry. *J Clin Psychiatry* 2016;77:e1101-e7.  
5  
6  
7  
8 24. Peters-Strickland T, Pestreich L, Hatch A, et al. A multicenter, 8-week, open-label study  
9 to assess usability of a digital health feedback system in adult patients with schizophrenia  
10 treated with oral aripiprazole. Presented at: American Psychiatric Association 169th  
11 Annual Meeting. May 14-18, 2016; Atlanta, GA.  
12  
13  
14  
15  
16  
17 25. Kopelowicz A, Baker RA, Zhao C, et al. A multicenter, open-label, pilot study evaluating  
18 the functionality of an integrated call center for a digital medicine system to optimize  
19 monitoring of adherence to oral aripiprazole in adult patients with serious mental illness.  
20  
21  
22  
23  
24  
25  
26  
27 26. Eysenbach G. The law of attrition. *J Med Internet Res* 2005;7:e11.  
28  
29 27. Farvolden P, Denisoff E, Selby P, et al. Usage and longitudinal effectiveness of a web-  
30 based self-help cognitive behavioral therapy program for panic disorder. *J Med Internet*  
31  
32  
33  
34  
35  
36 28. Christensen H, Griffiths KM, Korten AE, et al. A comparison of changes in anxiety and  
37 depression symptoms of spontaneous users and trial participants of a cognitive behavior  
38 therapy website. *J Med Internet Res* 2004;6:e46. doi:10.2196/jmir.6.4.e46  
39  
40  
41  
42  
43 29. Firth J, Cotter J, Torous J, et al. Mobile phone ownership and endorsement of "mHealth"  
44 among people with psychosis: a meta-analysis of cross-sectional studies. *Schizophr Bull*  
45  
46  
47  
48  
49 30. Palmier-Claus JE, Rogers A, Ainsworth J, et al. Integrating mobile-phone based  
50 assessment for psychosis into people's everyday lives and clinical care: a qualitative  
51  
52  
53  
54  
55  
56  
57  
58  
59  
60



- 1  
2  
3 31. Gossage-Worrall R, Holt RI, Barnard K, et al. STEPWISE - STructured lifestyle  
4 Education for People With SchizophrEnia: a study protocol for a randomised controlled  
5  
6 trial. *Trials* 2016;17:475. doi:10.1186/s13063-016-1572-1  
7  
8  
9  
10  
11  
12  
13  
14  
15  
16  
17  
18  
19  
20  
21  
22  
23  
24  
25  
26  
27  
28  
29  
30  
31  
32  
33  
34  
35  
36  
37  
38  
39  
40  
41  
42  
43  
44  
45  
46  
47  
48  
49  
50  
51  
52  
53  
54  
55  
56  
57  
58  
59  
60

For peer review only

## Figure Legends

**Figure 1.** Digital medicine system: co-encapsulated antipsychotic medication with miniature ingestible event marker in tablet (MIT) and compatible medical device. DM=digital medicine; HCP=healthcare professional.

**Figure 2.** Description of coproduction workshops with Southern Health NHS Foundation Trust. DMS=digital medicine system; EIP=Early Intervention in Psychosis; IG=information governance; MoSCoW=must have, should have, could have, won't have; NHS=National Health Service; PANSS=Positive and Negative Syndrome Scale; PPI=Patient and Public Involvement program.

**Figure 3.** Study design.

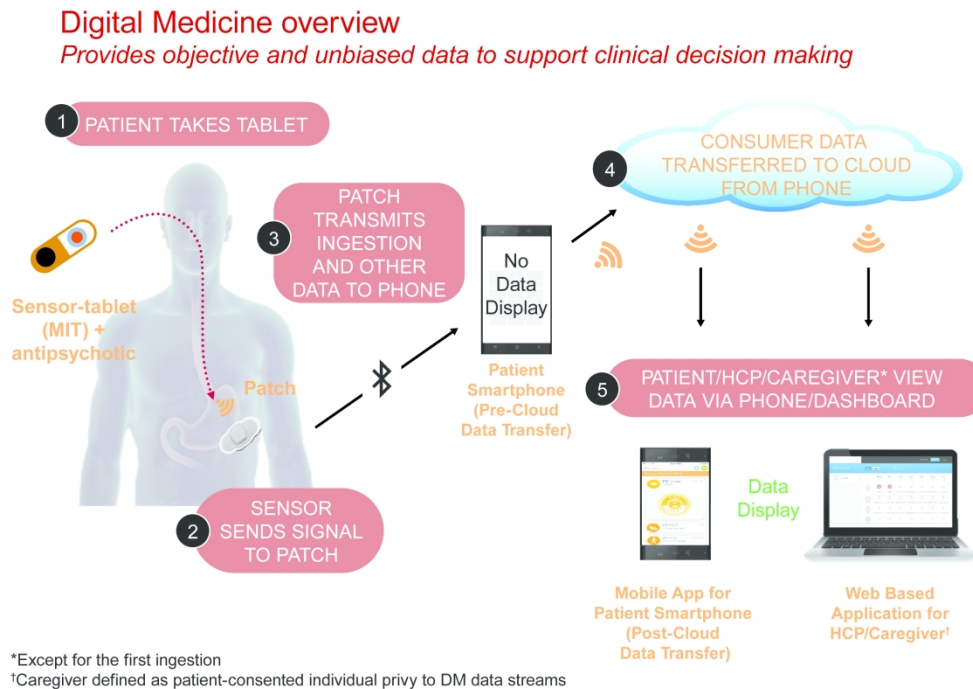

Figure 1. Digital medicine system: co-encapsulated antipsychotic medication with miniature ingestible event marker in tablet (MIT) and compatible medical device. DM=digital medicine; HCP=healthcare professional.

254x177mm (300 x 300 DPI)

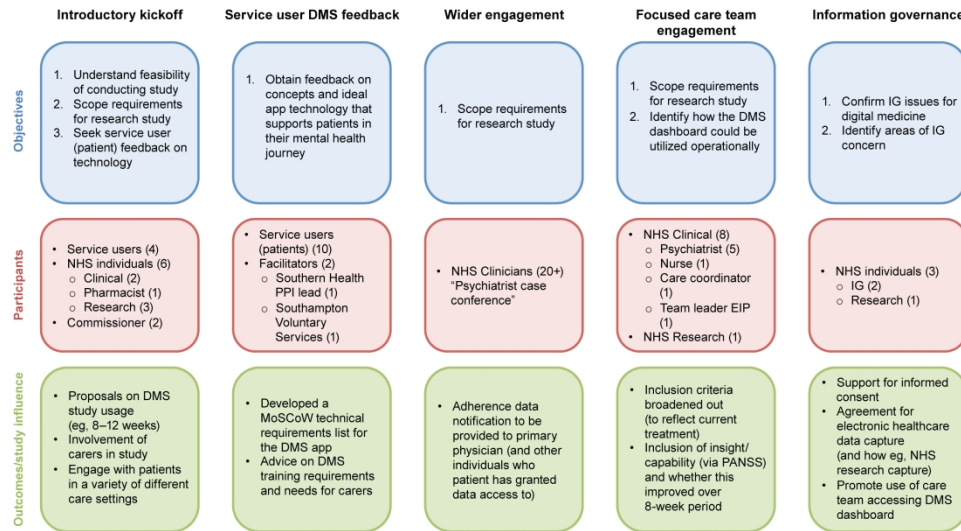

Figure 2. Description of coproduction workshops with Southern Health NHS Foundation Trust. DMS=digital medicine system; EIP=Early Intervention in Psychosis; IG=information governance; MoSCoW=must have, should have, could have, won't have; NHS=National Health Service; PANSS=Positive and Negative Syndrome Scale; PPI=Patient and Public Involvement program.

317x184mm (300 x 300 DPI)

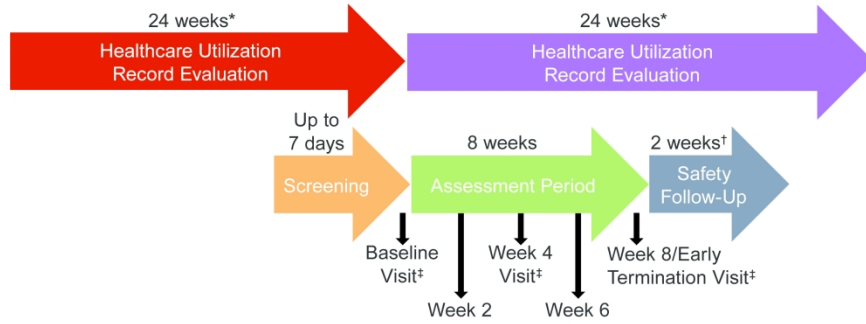

Healthcare professionals (HCPs) will review dashboard at weeks 2, 4, 6, and 8 and make treatment changes at their discretion.  
 \*Healthcare utilization will be recorded 24 weeks before and after baseline visit (for a total of 48 weeks).  
 †Safety follow-up phone call will occur 2 weeks after week 8/early termination visit.  
 ‡Patient visits will occur at baseline, week 4, and week 8/early termination. Other visits will be at the discretion of the HCP.

Figure 3. Study design.

241x108mm (300 x 300 DPI)

## Supplementary Material

### Supplemental Figure 1. Subject Usability and Satisfaction Scale (Ver 2.0)

#### Section A: Usability

##### 1. How easy or difficult was it for you to apply the patch on your body?

| Extremely Difficult | Difficult | Somewhat Difficult | Neutral | Somewhat Easy | Easy | Extremely Easy |
|---------------------|-----------|--------------------|---------|---------------|------|----------------|
| 1                   | 2         | 3                  | 4       | 5             | 6    | 7              |
|                     |           |                    |         |               |      |                |

##### 2. How easy or difficult was it to pair the patch with the mobile phone application (app)?

| Extremely Difficult | Difficult | Somewhat Difficult | Neutral | Somewhat Easy | Easy | Extremely Easy |
|---------------------|-----------|--------------------|---------|---------------|------|----------------|
| 1                   | 2         | 3                  | 4       | 5             | 6    | 7              |
|                     |           |                    |         |               |      |                |

##### 3. How easy or difficult was it for you to use the mobile phone application (app)?

| Extremely Difficult | Difficult | Somewhat Difficult | Neutral | Somewhat Easy | Easy | Extremely Easy |
|---------------------|-----------|--------------------|---------|---------------|------|----------------|
| 1                   | 2         | 3                  | 4       | 5             | 6    | 7              |
|                     |           |                    |         |               |      |                |

##### 4. How easy or difficult was it for you to use the Digital Medicine System?

| Extremely Difficult | Difficult | Somewhat Difficult | Neutral | Somewhat Easy | Easy | Extremely Easy |
|---------------------|-----------|--------------------|---------|---------------|------|----------------|
| 1                   | 2         | 3                  | 4       | 5             | 6    | 7              |
|                     |           |                    |         |               |      |                |

##### 5. How well do you agree with the following statement?

- In general, I did not mind wearing the patch.

| Strongly Disagree | Disagree | Somewhat Disagree | Neutral | Somewhat Agree | Agree | Strongly Agree |
|-------------------|----------|-------------------|---------|----------------|-------|----------------|
| 1                 | 2        | 3                 | 4       | 5              | 6     | 7              |

|  |  |  |  |  |  |  |
|--|--|--|--|--|--|--|
|  |  |  |  |  |  |  |
|--|--|--|--|--|--|--|

**6. Since your last visit, did you receive assistance when changing and pairing the required patches? Yes No**

If yes,

|                                                                  | Never | Once a month or less | A few times a month | Once a week | A few times a week | Daily |
|------------------------------------------------------------------|-------|----------------------|---------------------|-------------|--------------------|-------|
| How much assistance did you receive when applying the patches?   |       |                      |                     |             |                    |       |
| How much assistance did you receive when syncing the technology? |       |                      |                     |             |                    |       |

If you did receive any help or assistance, who helped or assisted you?  
(please place a ✓ [check] to indicate who helped or assisted you)

| Friend | Hired Caregiver | Relative* | Other** |
|--------|-----------------|-----------|---------|
|        |                 |           |         |

\*If a relative helped or assisted you, then please specify their relationship to you (such as wife, husband, father, mother, sister, brother, or whatever else you think is the most appropriate description of the relative who helped you): \_\_\_\_\_

\*\*If you selected "Other", please specify your relationship to the person who helped you  
\_\_\_\_\_

**Section B: Satisfaction**

**7. How easy or difficult was it for you to use the entire Digital Medicine System, which includes the patch, pills, and mobile phone application (app)?**

| Extremely Difficult | Difficult | Somewhat Difficult | Neutral | Somewhat Easy | Easy | Extremely Easy |
|---------------------|-----------|--------------------|---------|---------------|------|----------------|
| 1                   | 2         | 3                  | 4       | 5             | 6    | 7              |
|                     |           |                    |         |               |      |                |

8. How helpful or unhelpful was the Digital Medicine System in the management of your condition?

| Extremely Unhelpful | Unhelpful | Somewhat Unhelpful | Neutral | Somewhat Helpful | Helpful | Extremely Helpful |
|---------------------|-----------|--------------------|---------|------------------|---------|-------------------|
| 1                   | 2         | 3                  | 4       | 5                | 6       | 7                 |
|                     |           |                    |         |                  |         |                   |

9. How helpful or unhelpful was the Digital Medicine System for sharing information with your healthcare professionals to help you understand your treatment plan?

| Extremely Unhelpful | Unhelpful | Somewhat Unhelpful | Neutral | Somewhat Helpful | Helpful | Extremely Helpful |
|---------------------|-----------|--------------------|---------|------------------|---------|-------------------|
| 1                   | 2         | 3                  | 4       | 5                | 6       | 7                 |
|                     |           |                    |         |                  |         |                   |

10. How helpful or unhelpful was the Digital Medicine System in improving your discussions with your doctor / treatment team?

| Extremely Unhelpful | Unhelpful | Somewhat Unhelpful | Neutral | Somewhat Helpful | Helpful | Extremely Helpful |
|---------------------|-----------|--------------------|---------|------------------|---------|-------------------|
| 1                   | 2         | 3                  | 4       | 5                | 6       | 7                 |
|                     |           |                    |         |                  |         |                   |

11. Based on your experience, how would you rate your satisfaction with the Digital Medicine System?

| Extremely Dissatisfied | Dissatisfied | Somewhat Dissatisfied | Neutral | Somewhat Satisfied | Satisfied | Extremely Satisfied |
|------------------------|--------------|-----------------------|---------|--------------------|-----------|---------------------|
| 1                      | 2            | 3                     | 4       | 5                  | 6         | 7                   |
|                        |              |                       |         |                    |           |                     |

12. How likely would you be to use the Digital Medicine System in the future, if it were available and recommended by your doctor?

| Extremely Unlikely | Unlikely | Somewhat Unlikely | Neutral | Somewhat Likely | Likely | Extremely Likely |
|--------------------|----------|-------------------|---------|-----------------|--------|------------------|
| 1                  | 2        | 3                 | 4       | 5               | 6      | 7                |
|                    |          |                   |         |                 |        |                  |



## Supplemental Figure 2. Physician Utility Survey (Ver 2.0)

We ask the Principal Investigator, Physician Investigator, and Trial Coordinator(s) at a clinical site/trust to complete this survey for each patient enrolled. Please answer the below questions based on your overall experience using DMS.

### 1. How easy or difficult was it for you and your patient to apply the patch on the patient's body?

|                  | Extremel<br>y Difficult | Difficult | Somewhat<br>Difficult | Neutral | Somewhat<br>Easy | Easy | Extremely<br>Easy |
|------------------|-------------------------|-----------|-----------------------|---------|------------------|------|-------------------|
|                  | 1                       | 2         | 3                     | 4       | 5                | 6    | 7                 |
| For you          |                         |           |                       |         |                  |      |                   |
| For your patient |                         |           |                       |         |                  |      |                   |

### 2. How easy or difficult was it for you and your patient to sync the patch with the mobile phone application (app)?

|                  | Extremel<br>y Difficult | Difficult | Somewhat<br>Difficult | Neutral | Somewhat<br>Easy | Easy | Extremely<br>Easy |
|------------------|-------------------------|-----------|-----------------------|---------|------------------|------|-------------------|
|                  | 1                       | 2         | 3                     | 4       | 5                | 6    | 7                 |
| For you          |                         |           |                       |         |                  |      |                   |
| For your patient |                         |           |                       |         |                  |      |                   |

### 3. How easy or difficult was it for you and your patient to complete the overall onboarding for the Digital Medicine System?

|                  | Extremel<br>y Difficult | Difficult | Somewhat<br>Difficult | Neutral | Somewhat<br>Easy | Easy | Extremely<br>Easy |
|------------------|-------------------------|-----------|-----------------------|---------|------------------|------|-------------------|
|                  | 1                       | 2         | 3                     | 4       | 5                | 6    | 7                 |
| For you          |                         |           |                       |         |                  |      |                   |
| For your patient |                         |           |                       |         |                  |      |                   |

### 4. Overall, how easy or difficult was it for you and your patient to use the mobile phone application (app)?

|                  | Extremel<br>y Difficult | Difficult | Somewhat<br>Difficult | Neutral | Somewhat<br>Easy | Easy | Extremely<br>Easy |
|------------------|-------------------------|-----------|-----------------------|---------|------------------|------|-------------------|
|                  | 1                       | 2         | 3                     | 4       | 5                | 6    | 7                 |
| For you          |                         |           |                       |         |                  |      |                   |
| For your patient |                         |           |                       |         |                  |      |                   |

### 5. Overall, how easy or difficult was it for you and your patient to use the entire Digital Medicine System, which includes the patch, pills, and mobile phone application (app)?

|                  | Extremel<br>y Difficult | Difficult | Somewhat<br>Difficult | Neutral | Somewhat<br>Easy | Easy | Extremel<br>y Easy |
|------------------|-------------------------|-----------|-----------------------|---------|------------------|------|--------------------|
|                  | 1                       | 2         | 3                     | 4       | 5                | 6    | 7                  |
| For you          |                         |           |                       |         |                  |      |                    |
| For your patient |                         |           |                       |         |                  |      |                    |

### 6. How easy or difficult was it for you to use the HCP dashboard?

|                            |                  |                           |                |                      |             |                       |
|----------------------------|------------------|---------------------------|----------------|----------------------|-------------|-----------------------|
| <b>Extremely Difficult</b> | <b>Difficult</b> | <b>Somewhat Difficult</b> | <b>Neutral</b> | <b>Somewhat Easy</b> | <b>Easy</b> | <b>Extremely Easy</b> |
| <b>1</b>                   | <b>2</b>         | <b>3</b>                  | <b>4</b>       | <b>5</b>             | <b>6</b>    | <b>7</b>              |
|                            |                  |                           |                |                      |             |                       |

7. If you were in routine clinical practice (ie, in clinical practice without a study protocol), how helpful or unhelpful do you think the Digital Medicine System could be for the following elements of clinical management for this specific patient?

|                                 | <b>Extremely Unhelpful</b> | <b>Unhelpful</b> | <b>Somewhat Unhelpful</b> | <b>Neutral</b> | <b>Somewhat Helpful</b> | <b>Helpful</b> | <b>Extremely Helpful</b> |
|---------------------------------|----------------------------|------------------|---------------------------|----------------|-------------------------|----------------|--------------------------|
|                                 | <b>1</b>                   | <b>2</b>         | <b>3</b>                  | <b>4</b>       | <b>5</b>                | <b>6</b>       | <b>7</b>                 |
| Assessment                      |                            |                  |                           |                |                         |                |                          |
| Clinical Advice/Recommendations |                            |                  |                           |                |                         |                |                          |
| Treatment Decisions             |                            |                  |                           |                |                         |                |                          |

8. How effective was the Digital Medicine System in aiding decision-making for medication adherence?

| <b>Extremely Not Effective</b> | <b>Not Effective to Use</b> | <b>Somewhat Not Effective to Use</b> | <b>Neutral</b> | <b>Somewhat Effective to Use</b> | <b>Effective to Use</b> | <b>Extremely Effective to Use</b> |
|--------------------------------|-----------------------------|--------------------------------------|----------------|----------------------------------|-------------------------|-----------------------------------|
| <b>1</b>                       | <b>2</b>                    | <b>3</b>                             | <b>4</b>       | <b>5</b>                         | <b>6</b>                | <b>7</b>                          |
|                                |                             |                                      |                |                                  |                         |                                   |

9. How helpful or unhelpful was the Digital Medicine System in providing a way to better engage your patients in self-management of their condition?

| <b>Extremely Unhelpful</b> | <b>Unhelpful</b> | <b>Somewhat Unhelpful</b> | <b>Neutral</b> | <b>Somewhat Helpful</b> | <b>Helpful</b> | <b>Extremely Helpful</b> |
|----------------------------|------------------|---------------------------|----------------|-------------------------|----------------|--------------------------|
| <b>1</b>                   | <b>2</b>         | <b>3</b>                  | <b>4</b>       | <b>5</b>                | <b>6</b>       | <b>7</b>                 |
|                            |                  |                           |                |                         |                |                          |

10. How helpful or unhelpful was the Digital Medicine System in improving quality of care for your patient?

| <b>Extremely Unhelpful</b> | <b>Unhelpful</b> | <b>Somewhat Unhelpful</b> | <b>Neutral</b> | <b>Somewhat Helpful</b> | <b>Helpful</b> | <b>Extremely Helpful</b> |
|----------------------------|------------------|---------------------------|----------------|-------------------------|----------------|--------------------------|
| <b>1</b>                   | <b>2</b>         | <b>3</b>                  | <b>4</b>       | <b>5</b>                | <b>6</b>       | <b>7</b>                 |
|                            |                  |                           |                |                         |                |                          |

1  
2  
3  
4 **11. How helpful or unhelpful was the Digital Medicine System in improving your conversations with**  
5 **your patient about their treatment plan and progress?**  
6

| Extremely Unhelpful | Unhelpful | Somewhat Unhelpful | Neutral | Somewhat Helpful | Helpful | Extremely Helpful |
|---------------------|-----------|--------------------|---------|------------------|---------|-------------------|
| 1                   | 2         | 3                  | 4       | 5                | 6       | 7                 |
|                     |           |                    |         |                  |         |                   |

13 **12. How helpful or unhelpful was the Digital Medicine System in the identification of**  
14 **potential lifestyle changes for your patient (eg sleep and exercise)?**  
15

| Extremely Unhelpful | Unhelpful | Somewhat Unhelpful | Neutral | Somewhat Helpful | Helpful | Extremely Helpful |
|---------------------|-----------|--------------------|---------|------------------|---------|-------------------|
| 1                   | 2         | 3                  | 4       | 5                | 6       | 7                 |
|                     |           |                    |         |                  |         |                   |

22 **13. Other than during the patient visit(s), did you look at the HCP dashboard at other**  
23 **times? Please select all that apply**  
24

|                                            | Place a $\checkmark$ (check) next to the time you referred to the HCP dashboard |
|--------------------------------------------|---------------------------------------------------------------------------------|
| No, only during the patient visit          |                                                                                 |
| Prior to patient visit (same day as visit) |                                                                                 |
| In between visits                          |                                                                                 |
| Other: <i>Please Specify:</i> _____        |                                                                                 |

32 **14. What features did you find helpful? Please select all that apply**  
33

|                                               | Place a $\checkmark$ (check) next to the features you found helpful | For the features you have selected, please rank these features from 1 (most helpful) to 7 (least helpful) in order of helpfulness |
|-----------------------------------------------|---------------------------------------------------------------------|-----------------------------------------------------------------------------------------------------------------------------------|
| Pill ingestion data                           |                                                                     |                                                                                                                                   |
| Patient reported reason code for missed doses |                                                                     |                                                                                                                                   |
| Multiple dose alerts                          |                                                                     |                                                                                                                                   |
| Missed dose alerts                            |                                                                     |                                                                                                                                   |
| Activity                                      |                                                                     |                                                                                                                                   |
| Rest                                          |                                                                     |                                                                                                                                   |
| Patient reported rest quality rating          |                                                                     |                                                                                                                                   |
| Other: <i>Please Specify:</i><br>_____        |                                                                     |                                                                                                                                   |

1  
2  
3 **15. Did you set up alerts to be notified of missed doses? Yes/no**

- 4 a. If yes, based on your overall experience, how helpful were the missed dose  
5 alerts?

| Extremely Unhelpful | Unhelpful | Somewhat Unhelpful | Neutral | Somewhat Helpful | Helpful | Extremely Helpful | Not Applicable – No alerts received |
|---------------------|-----------|--------------------|---------|------------------|---------|-------------------|-------------------------------------|
| 1                   | 2         | 3                  | 4       | 5                | 6       | 7                 |                                     |
|                     |           |                    |         |                  |         |                   |                                     |

13 15a. If you received a missed dose alert what action did you take, if any? (If none,  
14 please write N/A) \_\_\_\_\_  
15

16 **16. Did you set up alerts to be notified of multiple doses? Yes/no**

- 17 a. If yes, based on your overall experience, how helpful were the multiple dose  
18 alerts?  
19

| Extremely Unhelpful | Unhelpful | Somewhat Unhelpful | Neutral | Somewhat Helpful | Helpful | Extremely Helpful | Not Applicable – No alerts received |
|---------------------|-----------|--------------------|---------|------------------|---------|-------------------|-------------------------------------|
| 1                   | 2         | 3                  | 4       | 5                | 6       | 7                 |                                     |
|                     |           |                    |         |                  |         |                   |                                     |

20 21 22 23 24 25 26  
27 16a. If you received a multiple dose alert what action did you take, if any? (If none, please write  
28 N/A) \_\_\_\_\_  
29

30 **17. How well do you agree with the following statement?**

- 31 a. Overall, the Digital Medicine System adds value to my practice.  
32

| Strongly Disagree | Disagree | Somewhat Disagree | Neutral | Somewhat Agree | Agree | Strongly Agree |
|-------------------|----------|-------------------|---------|----------------|-------|----------------|
| 1                 | 2        | 3                 | 4       | 5              | 6     | 7              |
|                   |          |                   |         |                |       |                |

33 34 35 36 37 38  
39 **18. Based on your overall experience with this patient, how would you rate your satisfaction with the**  
40 **Digital Medicine System?**  
41

| Extremely Dissatisfied | Dissatisfied | Somewhat Dissatisfied | Neutral | Somewhat Satisfied | Satisfied | Extremely Satisfied |
|------------------------|--------------|-----------------------|---------|--------------------|-----------|---------------------|
| 1                      | 2            | 3                     | 4       | 5                  | 6         | 7                   |
|                        |              |                       |         |                    |           |                     |

1  
2  
3 **Supplemental Figure 3. Caregiver/Support Person Involvement Scale (Ver 2.0)**  
4  
5

6 **DMS Caregiver/Support Person Involvement Scale**  
7

- 8  
9  
10 **1. Are you aware that the study participant/patient is currently participating in the Digital**  
11 **Medicine study (check one)?**  
12

| Yes | No* |
|-----|-----|
|     |     |

13  
14  
15  
16  
17  
18 **\*If no, stop here and do not answer the rest of the questions on this form.**  
19

- 20  
21 **2. Indicate your relationship to the study participant/patient by placing a √ (check).**  
22

| Friend | Hired Caregiver | Relative* | Other** |
|--------|-----------------|-----------|---------|
|        |                 |           |         |

23  
24  
25  
26  
27  
28 **\*If you are a relative, please specify relationship to the study participant/patient, e.g.,**  
29 **wife, father:**  
30

31 **\*\*If you selected "Other", please specify your relationship to the study**  
32 **participant/patient:**  
33  
34  
35  
36  
37  
38  
39  
40  
41  
42  
43  
44  
45  
46  
47  
48  
49  
50  
51  
52  
53  
54  
55  
56  
57  
58  
59  
60

---

3. How much involvement did you provide the subject with regard to taking medication, pairing the patch, applying the patch, and using the app during the course of the study?

|                                                                                         | Never | Once a month or less | A few times a month | Once a week      | A few times a week | Daily              |
|-----------------------------------------------------------------------------------------|-------|----------------------|---------------------|------------------|--------------------|--------------------|
| How much overall assistance did you provide the subject during the course of the study? |       |                      |                     |                  |                    |                    |
| How much assistance did you provide with patch application?                             |       |                      |                     |                  |                    |                    |
| How much assistance did you provide with syncing the technology?                        |       |                      |                     |                  |                    |                    |
| How much assistance did you provide with using the app?                                 |       |                      |                     |                  |                    |                    |
|                                                                                         | Never | Once a week          | A few times a week  | Nearly every day | Daily              | More than once/day |
| How much overall assistance did you provide during the past week of the study?          |       |                      |                     |                  |                    |                    |

### Clinical Global Impression Scale

#### Clinical Global Impression – Severity Scale (CGI-S)

Considering your total clinical experience with this particular population, how mentally ill is the patient at this time?

0 = Not assessed

4 = Moderately ill

1 = Normal, not at all ill

5 = Markedly ill

2 = Borderline mentally ill

6 = Severely ill

3 = Mildly ill

7 = Among the most extremely ill subjects

1  
2  
3 **Supplemental Figure 4. Personal and Social Performance Scale**  
4

5 Original version: Morosini PL, Magliano L, Brambilla L, et al. Development, reliability and  
6 acceptability of a new version of the DSM-IV Social and Occupational Functioning Assessment  
7 Scale (SOFAS) to assess routine social functioning. *Acta Psychiatr Scand* 2000;101(4):323-9  
8 Copyright © 2000 John Wiley & Sons, Inc. Reproduced with permission of Blackwell  
9 Publishing Ltd.  
10  
11  
12  
13  
14  
15  
16  
17  
18  
19  
20  
21  
22  
23  
24  
25  
26  
27  
28  
29  
30  
31  
32  
33  
34  
35  
36  
37  
38  
39  
40  
41  
42  
43  
44  
45  
46  
47  
48  
49  
50  
51  
52  
53  
54  
55  
56  
57  
58  
59  
60

## Personal and Social Performance Scale (PSP)

The rating is based on four main areas: (a) socially useful activities, including work and study; (b) personal and social relationships; (c) self-care; and (d) disturbing and aggressive behaviors.

Data will be captured in the following format using the PSP descriptions provided below:

|                                                         | Absent                   | Mild                     | Manifest                 | Marked                   | Severe                   | Very Severe              |
|---------------------------------------------------------|--------------------------|--------------------------|--------------------------|--------------------------|--------------------------|--------------------------|
| a. Socially useful activities, including work and study | <input type="checkbox"/> |
| b. Personal and social relationships                    | <input type="checkbox"/> |
| c. Self-care                                            | <input type="checkbox"/> |
| d. Disturbing and aggressive behaviors                  | <input type="checkbox"/> |

The levels of functioning in other areas should be taken into account to adjust the rating inside the decimal level (for instance, from 31 to 40). Suicidal risk is not included in the scale.

| 10-point intervals | PSP descriptions                                                                                                                                                                                                                                             |
|--------------------|--------------------------------------------------------------------------------------------------------------------------------------------------------------------------------------------------------------------------------------------------------------|
| 100–91             | Excellent functioning in all four main areas*. He/she is held in high consideration for his/her good qualities, copes adequately with life problems, is involved in a wide range of interests and activities.                                                |
| 90–81              | Good functioning in all four main areas, presence of only common problems or difficulties.                                                                                                                                                                   |
| 80–71              | Mild difficulties in 1 or more of areas a–c.                                                                                                                                                                                                                 |
| 70–61              | Manifest, but not marked difficulties in 1 or more areas a–c, or mild difficulties in d.                                                                                                                                                                     |
| 60–51              | Marked difficulties in 1 of areas a–c, or manifest difficulties in d.                                                                                                                                                                                        |
| 50–41              | Marked difficulties in 2 or more, or severe difficulties in 1 of areas a–c, with or without manifest difficulties in d.                                                                                                                                      |
| 40–31              | Severe difficulties in 1 and marked difficulties in at least 1 of areas a–c, or marked difficulties in d.                                                                                                                                                    |
| 30–21              | Severe difficulties in 2 of areas a–c, or severe difficulties in d, with or without impairment in areas a–c.                                                                                                                                                 |
| 20–11              | Severe difficulties in all areas a–d, or very severe in d with or without impairment in general areas a–c. If the person reacts to external prompts the suggested scores are 20–16, if not, the suggested scores are 15–11.                                  |
| 10–1               | Lack of autonomy in basic functioning with extreme behaviors but without survival risk (ratings 6–10) or with survival risk, eg, death risk due to malnutrition, dehydration, infections, inability to recognize situation of manifest danger (ratings 5–1). |



**For main areas a–c, the degrees of severity are:**

|                          |                                                                                                                                                                                                                                                                                          |
|--------------------------|------------------------------------------------------------------------------------------------------------------------------------------------------------------------------------------------------------------------------------------------------------------------------------------|
| Absent                   |                                                                                                                                                                                                                                                                                          |
| Mild                     | Not manifest difficulties, known only to someone who is very familiar with the person.                                                                                                                                                                                                   |
| Manifest, but not marked | Difficulties clearly noticeable by everyone, but not interfering substantially with the person's ability to perform his/her role in that area, given the person's socio-cultural context, age, sex and educational levels.                                                               |
| Marked                   | Difficulties heavily interfering with role performance in that area; however, the person is still able to do something without professional or social help, although inadequately and/or occasionally; if helped by someone, he/she may be able reach the previous level of functioning. |
| Severe                   | Difficulties that make the person unable to perform any role in that area, if not professionally helped, or lead the person to a destructive role; however, there are no survival risks.                                                                                                 |
| Very severe              | Impairments and difficulties of such intensity to endanger person's survival.                                                                                                                                                                                                            |

**For general area d, the degrees of severity are:**

|                          |                                                                                                                                                                                |
|--------------------------|--------------------------------------------------------------------------------------------------------------------------------------------------------------------------------|
| Absent                   |                                                                                                                                                                                |
| Mild                     | Mild rudeness, unsociability or whingeing.                                                                                                                                     |
| Manifest, but not marked | Speaking too loudly or speaking to others in a too-familiar manner, or eating in a socially unacceptable manner.                                                               |
| Marked                   | Insulting other in public, breaking or wrecking objects, acting frequently in a socially inappropriate but not dangerous way (eg, stripping in public or urinating in public). |
| Severe                   | Frequent verbal threats or frequent physical assaults, without intention or possibility of severe injuries.                                                                    |
| Very severe              | Frequent aggressive acts, aimed at or likely to cause severe injuries.                                                                                                         |

Occasional is defined as occurring three or more times in the reference period or occurring even less than three times but in circumstances and/or with such a previous history to convince the rater that there is a risk of recurrence in the near future. If the aggressive behavior has been present occasionally, the rating may be decreased by one degree, eg, from severe to marked.

\* Main areas: a = socially useful activities, including work and study; b = personal and social relationships; c = self-care; d = disturbing and aggressive behaviors.

**Guidelines for PSP Total Score**

Ratings from 71–100 reflect only mild difficulties.

Ratings from 31–70 reflect manifest disabilities of various degrees.

Ratings from 1–30 reflect functioning so poor that intensive support or supervision is needed.

### Supplemental Figure 5. Patient Activation Measure-Mental Health Scale

The following questions ask about your feelings regarding your mental healthcare. When you think about mental health and mental health care, how much do you agree or disagree with the following statements? Please circle the answer that you most agree with:

**1.** When all is said and done, I am the person who is responsible for managing my mental health.

|                   |          |       |                |
|-------------------|----------|-------|----------------|
| 1                 | 2        | 3     | 4              |
| Strongly Disagree | Disagree | Agree | Strongly Agree |

**2.** Taking an active role in my own mental health is the most important factor in determining my mental health and ability to function.

|                   |          |       |                |
|-------------------|----------|-------|----------------|
| 1                 | 2        | 3     | 4              |
| Strongly Disagree | Disagree | Agree | Strongly Agree |

**3.** I am confident that I can take actions that will help prevent or minimize some symptoms or problems associated with my mental health condition.

|                   |          |       |                |
|-------------------|----------|-------|----------------|
| 1                 | 2        | 3     | 4              |
| Strongly Disagree | Disagree | Agree | Strongly Agree |

**4.** I know what each of my prescribed mental health medications does.

|                   |          |       |                |
|-------------------|----------|-------|----------------|
| 1                 | 2        | 3     | 4              |
| Strongly Disagree | Disagree | Agree | Strongly Agree |

**5.** I am confident that I can tell when I need to go get mental health care, and when I can handle a mental health problem myself.

|                   |          |       |                |
|-------------------|----------|-------|----------------|
| 1                 | 2        | 3     | 4              |
| Strongly Disagree | Disagree | Agree | Strongly Agree |

**6.** I am confident I can tell my mental health clinician about concerns I have, even when he or she does not ask.

|                   |          |       |                |
|-------------------|----------|-------|----------------|
| 1                 | 2        | 3     | 4              |
| Strongly Disagree | Disagree | Agree | Strongly Agree |

1  
2  
3  
4  
5 **7. I am confident that I can follow through on mental health treatments I need to do at home.**

6  
7                   1                                   2                                   3                                   4  
8  
9 Strongly Disagree                   Disagree                   Agree                   Strongly Agree

10  
11  
12 **8. I understand the nature and causes of my mental health condition(s).**

13  
14                   1                                   2                                   3                                   4  
15  
16 Strongly Disagree                   Disagree                   Agree                   Strongly Agree

17  
18  
19  
20 **9. I know the different treatment options available for my mental health condition(s).**

21  
22                   1                                   2                                   3                                   4  
23  
24 Strongly Disagree                   Disagree                   Agree                   Strongly Agree

25  
26  
27  
28 **10. I am able to maintain the lifestyle changes I have made for my mental health.**

29  
30                   1                                   2                                   3                                   4  
31  
32 Strongly Disagree                   Disagree                   Agree                   Strongly Agree

33  
34  
35 **11. I know how to prevent further mental health problems.**

36  
37                   1                                   2                                   3                                   4  
38  
39 Strongly Disagree                   Disagree                   Agree                   Strongly Agree

40  
41  
42  
43 **12. I am confident I can figure out solutions when new situations or problems arise with my mental health.**

44  
45                   1                                   2                                   3                                   4  
46  
47 Strongly Disagree                   Disagree                   Agree                   Strongly Agree

48  
49  
50  
51 **13. I am confident that I can maintain lifestyle changes, like diet and exercise, even during times of stress.**

52  
53                   1                                   2                                   3                                   4  
54  
55 Strongly Disagree                   Disagree                   Agree                   Strongly Agree

# BMJ Open

## **A Study Protocol for the Hummingbird Study, a Multicenter Exploratory Trial to Assess the Acceptance and Performance of a Digital Medicine System in Adults With Schizophrenia, Schizoaffective Disorder, or First-Episode Psychosis**

|                                 |                                                                                                                                                                                                                                                                                                                                                                                                                                                                                                        |
|---------------------------------|--------------------------------------------------------------------------------------------------------------------------------------------------------------------------------------------------------------------------------------------------------------------------------------------------------------------------------------------------------------------------------------------------------------------------------------------------------------------------------------------------------|
| Journal:                        | <i>BMJ Open</i>                                                                                                                                                                                                                                                                                                                                                                                                                                                                                        |
| Manuscript ID                   | bmjopen-2018-025952.R1                                                                                                                                                                                                                                                                                                                                                                                                                                                                                 |
| Article Type:                   | Protocol                                                                                                                                                                                                                                                                                                                                                                                                                                                                                               |
| Date Submitted by the Author:   | 04-Mar-2019                                                                                                                                                                                                                                                                                                                                                                                                                                                                                            |
| Complete List of Authors:       | Fowler, J.; Otsuka Pharmaceutical Development & Commercialization, Inc.,<br>Cope, Nathan; Otsuka Pharmaceutical Europe Ltd.<br>Knights, Jonathan; Otsuka Pharmaceutical Development & Commercialization, Inc.<br>Phiri, Peter; Southern Health NHS Foundation Trust<br>Makin, Andrew; Otsuka Europe Development and Commercialisation Ltd.<br>Peters-Strickland, Tim; Otsuka Pharmaceutical Development & Commercialization, Inc.<br>Rathod, Shanaya; Southern Health NHS Foundation Trust, Psychiatry |
| <b>Primary Subject Heading</b>: | Mental health                                                                                                                                                                                                                                                                                                                                                                                                                                                                                          |
| Secondary Subject Heading:      | Evidence based practice                                                                                                                                                                                                                                                                                                                                                                                                                                                                                |
| Keywords:                       | Coproduction, digital medicine, schizoaffective disorder, schizophrenia                                                                                                                                                                                                                                                                                                                                                                                                                                |
|                                 |                                                                                                                                                                                                                                                                                                                                                                                                                                                                                                        |

SCHOLARONE™  
Manuscripts

Study Protocol for DMS use for schizophrenia in the UK  
Revised to address Peer-review

1  
2  
3 1 **A Study Protocol for the Hummingbird Study, a Multicenter Exploratory**  
4  
5  
6 2 **Trial to Assess the Acceptance and Performance of a Digital Medicine System**  
7  
8  
9 3 **in Adults With Schizophrenia, Schizoaffective Disorder, or First-Episode**  
10  
11 4 **Psychosis**  
12  
13  
14  
15  
16  
17  
18  
19  
20  
21  
22  
23  
24  
25  
26  
27  
28

29 6 Running title: Study protocol for DMS use in schizophrenia in the UK  
30  
31  
32  
33  
34  
35  
36  
37  
38  
39  
40  
41  
42  
43  
44  
45  
46  
47  
48  
49  
50  
51  
52  
53  
54  
55  
56  
57  
58  
59  
60

8 Authors:

9 J. Corey Fowler, PhD,<sup>1</sup> Nathan Cope, PhD,<sup>2</sup> Jonathan Knights, PhD,<sup>1</sup> Peter Phiri, PhD,<sup>3</sup> Andrew  
10 Makin, MD,<sup>4</sup> Tim Peters-Strickland, MD,<sup>1</sup> Shanaya Rathod, DM, MRCPsych<sup>3</sup>

12 Affiliations:

13 <sup>1</sup>Otsuka Pharmaceutical Development & Commercialization, Inc., Princeton, NJ, USA; <sup>2</sup>Otsuka  
14 Pharmaceutical Europe Ltd., Wexham, UK; <sup>3</sup>Southern Health NHS Foundation Trust,  
15 Southampton, UK; <sup>4</sup>Otsuka Europe Development and Commercialisation Ltd., Wexham, UK

17 E-mail addresses:

18 [corey.fowler@otsuka-us.com](mailto:corey.fowler@otsuka-us.com), [NCope@otsuka-europe.com](mailto:NCope@otsuka-europe.com), [Jonathan.Knights@otsuka-us.com](mailto:Jonathan.Knights@otsuka-us.com),  
19 [Peter.Phiri@southernhealth.nhs.uk](mailto:Peter.Phiri@southernhealth.nhs.uk), [AMakin@otsuka-europe.com](mailto:AMakin@otsuka-europe.com), [tim.peters-strickland@otsuka-  
21 us.com](mailto:tim.peters-strickland@otsuka-<br/>20 us.com), [shanayarathod@nhs.net](mailto:shanayarathod@nhs.net)

22 Address correspondence to: J. Corey Fowler, PhD

23 [corey.fowler@otsuka-us.com](mailto:corey.fowler@otsuka-us.com)

24 Associate Director, Global Clinical Development

25 Otsuka Pharmaceutical Development & Commercialization, Inc.

26 508 Carnegie Center Blvd, Suite 300

27 Princeton, NJ 08540, USA

28 +1 919 475 4823

Study Protocol for DMS use for schizophrenia in the UK  
Revised to address Peer-review

1  
2  
3 29  
4  
5 30 Word count (max 4000 for BMJ Open): 3988 (Intro through conclusion, not including table)  
6  
7 31 Table count: 1  
8  
9 32 Figure count: 3 (+5 supplemental)  
10  
11 33 Reference count: 31  
12  
13 34  
14  
15 35  
16  
17  
18  
19  
20  
21  
22  
23  
24  
25  
26  
27  
28  
29  
30  
31  
32  
33  
34  
35  
36  
37  
38  
39  
40  
41  
42  
43  
44  
45  
46  
47  
48  
49  
50  
51  
52  
53  
54  
55  
56  
57  
58  
59  
60

Study Protocol for DMS use for schizophrenia in the UK  
Revised to address Peer-review

## 36 **ABSTRACT**

37 Objectives: In patients with schizophrenia, medication adherence is important for relapse  
38 prevention, and effective adherence monitoring is essential for treatment planning. A digital  
39 medicine system (DMS) has been developed to objectively monitor patient adherence and  
40 support clinical decision-making regarding treatment choices. This study's objective is to assess  
41 the acceptance and performance of the DMS in adults with schizophrenia, schizoaffective  
42 disorder, or first-episode psychosis and in healthcare professionals (HCPs) in the United  
43 Kingdom.

44 Design: This is a multicenter, 8-week, single-arm, open-label pragmatic trial designed using  
45 coproduction methodology.

46 Setting: The study will be conducted at 5 National Health Service Foundation Trusts in the  
47 United Kingdom.

48 Participants: Patients 18 to 65 years old with a diagnosis of schizophrenia, schizoaffective  
49 disorder, or first-episode psychosis will be eligible. HCPs (psychiatrists, care coordinators,  
50 nurses, pharmacists) researchers, information governance (IG) personnel, Clinical  
51 Commissioning Groups (CCGs), and patients participated in study design and coproduction.

52 Interventions: The DMS is an integrated system comprising an oral sensor tablet co-encapsulated  
53 with an antipsychotic, nonmedicated wearable patch, mobile application (app), and Web-based  
54 dashboard. The co-encapsulation product contains aripiprazole, olanzapine, quetiapine, or  
55 risperidone, as prescribed by the HCP, with a miniature ingestible event marker (IEM) in tablet.  
56 Upon ingestion, the IEM transmits a signal to the patch, which collects ingestion and physical  
57 activity data for processing on the patient's smartphone or tablet before transmission to a cloud-  
58 based server for viewing by patients, caregivers, and HCPs on secure web portals or mobile apps.

Study Protocol for DMS use for schizophrenia in the UK  
Revised to address Peer-review

59 Outcome measures: The primary and secondary endpoints will be the proportion of days with  
60 good patch coverage and ingestion adherence, respectively.

61 Conclusions: This study will provide data on the acceptance and performance of the DMS in UK  
62 patients with schizophrenia, schizoaffective disorder, or first-episode psychosis and in caregivers  
63 and HCPs.

64 ClinicalTrials.gov: NCT03568500; EudraCT 2017-004602-17

## 65 **Keywords**

66 Coproduction, digital medicine, schizoaffective disorder, schizophrenia

## 67 **STRENGTHS AND LIMITATIONS OF THIS STUDY**

- 68 • This study was codeveloped with input from clinical practitioners, researchers, patients,  
69 caregivers, service managers, IG teams, and clinical commissioning groups to obtain  
70 information that will best serve all those involved in the treatment and care of patients  
71 with schizophrenia, schizoaffective disorder, and first-episode psychosis.
- 72 • The digital medicine system (DMS) uses an integrated, user-friendly system to provide  
73 objective feedback on patient medication adherence and physical health parameters, such  
74 as activity and rest levels, as well as voluntary subjective entries regarding mood and rest  
75 quality, to help support treatment decisions and evaluation.
- 76 • Information from the DMS is made readily available to patients, caregivers (with the  
77 patient's consent), and physicians to support clinical decision making, proactive  
78 intervention, and individualized care in near to real time.
- 79 • Possible limitations of this study are the small sample size (N=60), limited  
80 generalizability to the broader pool of UK mental health patients and providers, and the



Study Protocol for DMS use for schizophrenia in the UK  
Revised to address Peer-review

1  
2  
3 81 relatively short 12-week timeframe. Although the DMS does require the patient to  
4  
5 82 engage more with their own care, the benefits of increasing their awareness of  
6  
7 83 medication, activity, rest, and mood patters outweighs risks/burden for most patients.  
8  
9  
10 84 The DMS was not developed for all mental health patients, but for a subset of patients  
11  
12 85 who have difficulty with adherence and want to improve their status by self-monitoring  
13  
14 86 with potential for their HCP's to make better clinical decisions based on objective data  
15  
16 87 from the DMS. Patients with poor insight into their illness will likely be a better  
17  
18  
19 88 candidate for a long-acting injectable atypical antipsychotic than this DMS.  
20  
21  
22  
23  
24 89  
25  
26  
27  
28  
29  
30  
31  
32  
33  
34  
35  
36  
37  
38  
39  
40  
41  
42  
43  
44  
45  
46  
47  
48  
49  
50  
51  
52  
53  
54  
55  
56  
57  
58  
59  
60

Study Protocol for DMS use for schizophrenia in the UK  
Revised to address Peer-review

## 90 INTRODUCTION

91 Schizophrenia has an enormous social and economic burden worldwide, accounting for 1.1% of  
92 total disability-adjusted life-years and 2.7% of years lived with disability [1, 2]. In Europe, the  
93 economic impact of schizophrenia and other psychotic disorders and syndromes in 2010 was  
94 estimated at €93.9 billion [3]. Because it is a chronic disease, maintenance treatment is often  
95 necessary to prevent relapse and preserve quality of life over the long term [4, 5]. Although  
96 antipsychotic medications are effective [6-8], poor insight into schizophrenia can increase risk of  
97 medication nonadherence [9, 10]. In patients with schizophrenia, the rate of nonadherence to  
98 prescribed antipsychotics has been reported to be as high as 74% [11]. Not only is medication  
99 nonadherence burdensome to patients and their families, it also increases the likelihood of  
100 rehospitalization and relapse [12] and contributes substantially to healthcare costs [13]. In  
101 2005/2006, mean annual psychiatric inpatient and medication costs for patients with  
102 schizophrenia in England were estimated to be approximately £3,000 and £2,000 per patient,  
103 respectively [14].

104 Because medication adherence is important to relapse prevention in schizophrenia [15], effective  
105 adherence monitoring is an essential part of the treatment plan. Although there are various  
106 subjective methods for determining medication adherence, including patient surveys, adherence  
107 diaries, and clinician ratings of patient symptoms and medication side effects, these methods  
108 have low validity [16]. Blister packs and electronic medication bottle caps can provide an  
109 indicator of pill removal or bottle opening and have been shown to improve adherence [17, 18],  
110 but neither technology provides an objective marker of pill ingestion or supports remote  
111 monitoring by healthcare professionals (HCPs). Optimal adherence monitoring and support for

Study Protocol for DMS use for schizophrenia in the UK  
Revised to address Peer-review

1  
2  
3 112 patients with schizophrenia requires a system that provides physicians with objective information  
4  
5 113 during interim periods between patient visits.  
6  
7  
8 114 The use of modern technology such as personal digital assistants [19], digital wristwatches [20],  
9  
10 115 handheld computers [21], and mobile phones [22] to help people with schizophrenia dealing with  
11  
12 116 their disease has shown success. A digital medicine system (DMS) has been developed as a drug-  
13  
14 117 device combination to objectively assess and report ingestion of prescription antipsychotics [23].  
15  
16 118 The DMS has 4 main components: an ingestible sensor embedded within an inert tablet, a  
17  
18 119 nonmedicated wearable sensor (patch) worn by the patient, a mobile application (app), and a  
19  
20 120 Web-based dashboard [23]. Upon interaction with stomach fluids, the ingestible sensor is  
21  
22 121 activated and communicates with the wearable sensor, which sends a signal to a Bluetooth-paired  
23  
24 122 mobile device where it can be viewed by patients or be subsequently viewed by HCPs and  
25  
26 123 caregivers using secure mobile- and cloud-based software [23]. The DMS also enables patients  
27  
28 124 to share data on their activity and rest levels as well as subjective data on mood and rest quality,  
29  
30 125 which can be generated while the patient is engaged with the system. The intention of the DMS  
31  
32 126 is to encourage greater patient self-management and behavior change while enabling caregivers  
33  
34 127 and HCPs to provide better care and support both within and outside of office visits, further  
35  
36 128 engaging patients in their ongoing disease management. The data is communicated to the  
37  
38 129 psychiatrist that is connected to the patient on the MyCite platform. Additionally, should the  
39  
40 130 patient choose to share their data, they are able to invite additional healthcare providers,  
41  
42 131 caregivers and/or family or friends. Recipients of the data, through a web-based password  
43  
44 132 protected platform, are able to view this data and assist the patient with their treatment plan,  
45  
46 133 however HCPs can only access the portal for a specific patient once he/she has consented to give  
47  
48 134 them access to their information in the system. It is envisioned that HCPs will be able to use this  
49  
50  
51  
52  
53  
54  
55  
56  
57  
58  
59  
60

Study Protocol for DMS use for schizophrenia in the UK  
Revised to address Peer-review

1  
2  
3 135 data to make more informed clinical decisions such as whether individuals need dose adjustment,  
4  
5 136 medication changes or conversations on lifestyle, adherence or other parameters.  
6  
7

8 137 Previous results in the USA have shown in an open-label, 8-week study, 78% (47/60) of patients  
9  
10 138 and 72% (43/60) of HCPs reported being somewhat satisfied, satisfied, or extremely satisfied  
11  
12 139 with the DMS [24]. Findings from another open-label study showed patients to be actively  
13  
14 140 involved in their treatment, with 73.5% (36/49) utilizing call centers for technological DMS  
15  
16 141 support [25]; the rate of ingestion adherence in this study for the 15 patients with schizophrenia  
17  
18 142 was 85.6% [25].  
19  
20  
21  
22

23 143 The DMS from the current study (namely the ingestible sensor and the wearable sensor) are  
24  
25 144 Conformité Européene (CE)–marked for use in Europe as class IIa medical devices (CE 559373),  
26  
27 145 but studies in European mental health populations have not been performed. Therefore, the  
28  
29 146 objective of this exploratory study is to assess the acceptance and performance of the DMS  
30  
31 147 among adult patients with schizophrenia, schizoaffective disorder, or first-episode psychosis and  
32  
33 148 among HCPs from different care settings in the United Kingdom. We are particularly interested  
34  
35 149 in assessing the acceptance of the digital medicine technology in individuals from different care  
36  
37 150 settings. Acceptance will be assessed by study completion and, feedback from subjects from  
38  
39 151 patient satisfaction surveys. Furthermore, acceptance will also be evaluated by healthcare  
40  
41 152 providers using the system; this will be assessed by how their clinical decisions altered whilst  
42  
43 153 using the system and through HCP Utility questionnaire evaluations.  
44  
45  
46  
47  
48

49 154 In respect to performance, the study will be assessing multiple hardware and software from a  
50  
51 155 varied population. Based on operational feedback of different phones and OS and any technical  
52  
53 156 troubleshooting that occurs, the study will be able to determine areas of the app that need to be  
54  
55 157 enhanced to ensure that the app functions across multiple hardware and operating systems.  
56  
57  
58  
59  
60

Study Protocol for DMS use for schizophrenia in the UK  
Revised to address Peer-review

1  
2  
3 158 Previous studies performed using the DMS were conducted in relatively stable individuals with  
4  
5 159 schizophrenia. For this study, we have broadened out the inclusion criteria and will be assessing  
6  
7  
8 160 the technology in a range of clinical groups from different care settings, such as those individuals  
9  
10 161 managed in the community or on specialized services such as Early Intervention in Psychosis  
11  
12 162 services to determine the performance in these different environments.  
13  
14

15 163 The study is not intended to measure and report or make any claims of adherence, but instead, to  
16  
17 164 report the observed ingestions recorded by the DMS. Our goal is to look at the impact of  
18  
19  
20 165 patients' improvements as a result of participation (e.g. reduced need for follow-up care,  
21  
22 166 knowledge of adherence to medication to help physicians decide whether patients are medication  
23  
24 167 compliant or require a long acting injectable or other follow-up care) with the hypothesis that  
25  
26 168 DMS will reduce overall healthcare utilization burden.  
27  
28  
29  
30

## 31 169 **METHODS AND ANALYSIS**

32  
33  
34

### 35 170 **Study design**

36

37 171 This is a multicenter, 8-week, single-arm, open-label trial to evaluate the acceptance and  
38  
39 172 performance of the DMS in adult patients with schizophrenia, schizoaffective disorder, or first-  
40  
41  
42 173 episode psychosis on an oral atypical antipsychotic medication (aripiprazole, olanzapine,  
43  
44 174 quetiapine, or risperidone) and in HCPs. Recruitment began the same day that we submitted to  
45  
46 175 CT.gov, 25/MAY. However, we didn't consent our first patient until 11/JUN and dosing  
47  
48 176 occurred on 18/JUN. The study will take place at 5 institutions in the United Kingdom:  
49  
50 177 Northumberland, Tyne and Wear National Health Service (NHS) Foundation Trust, Surrey and  
51  
52  
53 178 Borders Partnership NHS Foundation Trust, Oxford Health NHS Foundation Trust, South  
54  
55  
56 179 London and Maudsley NHS Foundation Trust, and Southern Health NHS Foundation Trust. The  
57  
58  
59  
60

Study Protocol for DMS use for schizophrenia in the UK  
Revised to address Peer-review

180 first patient's first visit occurred in May 2018. Patient recruitment will be targeted to last  
181 approximately 4 months.

## 182 Patient selection

183 Patients for this exploratory study will be identified using database searches conducted at each  
184 study site per HCP discretion. Inclusion and exclusion criteria are provided in **Table 1**. The  
185 degree of clinical stability will be varied across participants that enroll. In short, a fully stable  
186 patient population will not be actively recruited, instead a range of clinical populations (crudely  
187 based on CGI-S) from different care settings will participate.

188 **Table 1. Inclusion and Exclusion Criteria**

| Inclusion criteria                                                                                                                                                                                                                                                                                                                                                                                                                                                                                                                                                                                                                                                                                                                                                                                                                                                                                                                                                                                                                                                                                                                                                                                                                                                                                                                                                                                                                                                                                                                                                                                                                                                                                                                                                                                                                                                           |
|------------------------------------------------------------------------------------------------------------------------------------------------------------------------------------------------------------------------------------------------------------------------------------------------------------------------------------------------------------------------------------------------------------------------------------------------------------------------------------------------------------------------------------------------------------------------------------------------------------------------------------------------------------------------------------------------------------------------------------------------------------------------------------------------------------------------------------------------------------------------------------------------------------------------------------------------------------------------------------------------------------------------------------------------------------------------------------------------------------------------------------------------------------------------------------------------------------------------------------------------------------------------------------------------------------------------------------------------------------------------------------------------------------------------------------------------------------------------------------------------------------------------------------------------------------------------------------------------------------------------------------------------------------------------------------------------------------------------------------------------------------------------------------------------------------------------------------------------------------------------------|
| <ul style="list-style-type: none"> <li>• Willing and able to give written informed consent and adhere to trial procedures</li> <li>• Able to read and understand English</li> <li>• Age 18–65 years at the time of informed consent</li> <li>• Possessing a smartphone and able to use it to interact with the digital medicine system (DMS) application <b>through robust and dependable cellular or wireless internet connections (Subjects should have WiFi at home and/or at work, or at the very least have access to free WiFi hot spots. Alternatively, subjects should have a sufficient data plan from their mobile provider and/or coverage on their phone. Such assessments are made during the screening of potential subjects.)</b></li> <li>• Cooperative, able to ingest oral medication, willing to complete aspects of the trial, and capable of reporting adverse events (AEs)</li> <li>• Clinical diagnosis of schizophrenia, schizoaffective disorder (defined by International Classification of Diseases, Tenth Revision, codes F20 and F25), or first-episode psychosis based on case note review</li> <li>• Prescription for aripiprazole, olanzapine, quetiapine, or risperidone</li> <li>• Fulfills <math>\geq 1</math> of the following: <ul style="list-style-type: none"> <li>○ Discharge from a hospital admission (within 7 days of discharge) to an acute intervention team</li> <li>○ Referral to an acute intervention team before hospital admission</li> <li>○ Referral from an acute intervention team to a community team</li> <li>○ Managed by community services</li> <li>○ Inclusion within early intervention caseload (&lt;3 years from initial symptoms)</li> <li>○ Healthcare professional (HCP) determines the patient would benefit</li> </ul> </li> <li>• General medical condition does not pose additional risk</li> </ul> |

Study Protocol for DMS use for schizophrenia in the UK  
Revised to address Peer-review

- Skin on the anterior chest above the lower edge of the rib cage is free of any dermatologic problem

#### **Exclusion criteria**

- Any disorder that may affect patient's ability to participate in the trial or interact with a smartphone
- Likely to be incapable of using DMS technology, even with assistance
- History or evidence of a medical condition that would expose patient to undue risk of an AE
- Known allergy to adhesive tape or any component of the patch or co-encapsulation product
- Current incarceration in prison system
- Hospitalization at the time of screening due to mental or physical illness
- HCP recommendation to not participate
- Aversion to taking gelatin capsules
- Women who are breastfeeding, pregnant, or plan to become pregnant

189

#### **Intervention**

191 The DMS is an integrated, 4-component system comprising an oral co-encapsulation (CoE)  
192 pharmacologic sensor tablet, a Proteus® Patch, a mobile app, and Otsuka Medical dashboard  
193 software (**Figure 1**). Each CoE product contains an approved antipsychotic medication  
194 (aripiprazole, olanzapine, quetiapine, or risperidone) encapsulated with a miniature ingestible  
195 event marker (IEM) in tablet. HCPs will select the medication and dosage based on each  
196 patient's needs. Upon taking the medication, the IEM transmits a signal to the nonmedicated  
197 patch that is attached to the patient's skin. The patch collects IEM ingestion and physical activity  
198 data, which are then processed by the Patch Analytics Block on the patient's smartphone.  
199 Processed data are transferred through the app on the smartphone and sent to a cloud-based  
200 server for patient, caregiver, and HCP viewing on Otsuka Medical software through web portals  
201 or mobile apps. Patients will have access to the Otsuka Patient Application, caregivers will have

Study Protocol for DMS use for schizophrenia in the UK  
Revised to address Peer-review

202 access (with patient consent) to the Otsuka Caregiver Web Portal, and HCPs will have access to  
203 the Otsuka Healthcare Provider Web Portal.

## 204 **Coproduction and patient involvement**

205 This study was designed using coproduction methodology involving NHS staff and patients  
206 (**Figure 2**). Coproduction in this protocol is the involvement of people with lived experience of  
207 mental illness (diagnosed or otherwise) as equal partners alongside other healthcare stakeholders,  
208 in the design and contribution to the protocol. The lead site, Southern Health NHS Foundation  
209 Trust, held 5 coproduction workshops, and a subset of these workshops was repeated at other  
210 study sites to elicit feedback on the study design. These discussions addressed pharmacy items  
211 for the CoE product; HCP recruitment strategies; and protocols for identification, recruitment,  
212 and interactions with suitable patients and their general practitioners. Throughout the various  
213 workshops at the different sites, participants included clinicians, pharmacists, researchers, IG  
214 personnel (refers to the way in which the NHS handles, stores and processes information, in  
215 particular personal and sensitive information relating to patients and employees. It was vital to  
216 ensure that IG individuals were happy with the privacy and storage features of the digital  
217 medicine system), psychiatrists, care coordinators, nurses, information technology personnel,  
218 CCGs (clinically led groups within the NHS that are responsible for the planning and  
219 commissioning of healthcare services for their local area) , and patients (**Figure 2**).

220 After changes from the coproduction workshops were incorporated, the Patient and Public  
221 Involvement and Service User Lead from 2 study sites (Surrey and Borders Partnership NHS  
222 Foundation Trust and Northumberland, Tyne, and Wear NHS Foundation Trust) engaged service  
223 users to participate in a patient focus group. The objective of the focus groups was to obtain  
224 feedback on the app technology and assess the completion of specific app tasks. The groups



Study Protocol for DMS use for schizophrenia in the UK  
Revised to address Peer-review

225 identified issues that may have prevented the completion of key tasks and whether greater  
226 explanation would be needed, for instance in ensuring the app could send notifications to  
227 patients. Furthermore, general feedback on colour and language was also obtained.

228

## 229 **Procedures**

230 The study will comprise 3 phases: a screening phase of up to 7 days, an 8-week assessment  
231 phase, and a 2-week safety follow-up (**Figure 3**). Screening and baseline may occur at a single  
232 visit or at 2 visits separated by up to 7 days. At the screening/baseline visit, patients providing  
233 informed consent will receive patches, CoE product, and other supplies and undergo training by  
234 the HCPs on required and correct use of the DMS. HCPs will confirm proper patch application to  
235 the skin and pairing of the patch with the smartphone app when patients commence their usage  
236 of the digital medicine system, so called on boarding. These individuals will either be  
237 psychiatrists or research assistants for the site. During time in-between the only required site  
238 visits at weeks 4 and 8, patients will perform patch changing themselves and be guided, if  
239 required, through videos contained within the app. There is a freephone technical support line to  
240 assist individuals should they wish. Patients will be instructed to wear the patch continuously,  
241 replacing it every 7 days or as needed during the assessment period. An integrated call center  
242 will be available to patients for technical support regarding use of the DMS.

243 During the subsequent 8-week assessment period, patients will visit their HCP at weeks 4 and 8  
244 (or at early termination) for clinical evaluation and review of DMS data. At the week 4 visit,  
245 patients will also obtain a prescription refill. HCPs will be required to monitor and review DMS  
246 data at least every 2 weeks, with the option of requesting additional patient visits as needed.  
247 HCPs will also have the ability to modify the patient's treatment plan at their discretion. Safety

Study Protocol for DMS use for schizophrenia in the UK  
Revised to address Peer-review

248 and tolerability will be assessed on an ongoing basis throughout the assessment period and  
249 during the subsequent 2-week safety follow-up, during which time a follow-up telephone call  
250 will be made to each study participant.

251 Healthcare utilization record evaluation will occur continuously beginning at the  
252 baseline/screening visit and will span a period ranging from 24 weeks before baseline/screening  
253 to 24 weeks after screening. All hospital admissions will be recorded and categorized as  
254 “planned,” “unplanned,” “related,” or “unrelated” to psychiatric illness. Characteristics of each  
255 HCP encounter will also be recorded, including the nature of the contact; HCP role; whether the  
256 visit was planned or unplanned; whether or not the contact was initiated as a result of the DMS;  
257 and any medication titration, adherence counseling, education, or lifestyle coaching that  
258 occurred.

### 259 **Outcomes**

260 The primary endpoint is the proportion of days with good patch coverage during the assessment  
261 period, which will be defined as having  $\geq 80\%$  patch data available or IEMs detected within each  
262 day of the assessment period. The secondary endpoint is ingestion adherence, defined as the  
263 proportion of detected IEMs to the total expected IEMs ingested on the assessment days that  
264 showed good patch coverage.

265 The following exploratory endpoints will also be included:

- 266 • The proportion of time during the assessment period that patients wear their patch
- 267 • Engagement and satisfaction of patients, HCPs, and caregivers as determined using the  
268 Subject Usability and Satisfaction Scale (**Supplemental Figure 1**), the Physician Utility

Study Protocol for DMS use for schizophrenia in the UK  
Revised to address Peer-review

- 269 Survey (**Supplemental Figure 2**), and the Caregiver/Support Person Involvement Scale  
270 (**Supplemental Figure 3**)
- 271 • Personal and social functioning as assessed using the Personal and Social Performance  
272 Scale (**Supplemental Figure 4**)
  - 273 • Patient activation as assessed using the Patient Activation Measure-Mental Health Scale  
274 (**Supplemental Figure 5**)
  - 275 • The proportion of days that patients and HCPs use the app and dashboard, respectively
  - 276 • The proportion of ingested IEM tablets registered on the digital health data server of the  
277 total expected IEM tablets ingested
  - 278 • Safety variables will include the frequency and severity of serious adverse events and  
279 device-related nonserious adverse events, suicidality, and any product quality complaints  
280 that may arise. Suicidality will be determined by face-to-face risk assessment according  
281 to each study site's standard operating procedure.

## 282 **Statistical analysis**

283 A sample size of 60 patients was determined based on an anticipated 25% discontinuation rate,  
284 such that  $\geq 45$  patients would complete the 8-week assessment period. The study described is a  
285 feasibility study with no comparisons and no formal power calculations. The sample size was  
286 chosen to contain roughly 20 patients per indication and align with historical studies performed  
287 in the USA. The discontinuation rate is assumed based on similar discontinuations for other  
288 psychiatry studies and the fact that an actively clinical stable population is not being recruited.  
289 Data will be analyzed in the intent-to-treat population (ie, all patients who enter the trial and use  
290 the DMS). All data will be analyzed using descriptive statistics. Continuous variables will be

Study Protocol for DMS use for schizophrenia in the UK  
Revised to address Peer-review

291 summarized using mean, median, range, and standard deviation. Categorical variables will be  
292 summarized using frequency distributions.

### 293 **Data protection**

294 Before initiating participation, informed consent will be obtained from all patients and  
295 caregivers. Health information will be de-identified to the fullest possible extent. However, some  
296 identifiers or sensitive health information cannot be stripped (eg, psychiatric medical history,  
297 participation in a care program approach, presence of a community treatment order, employment  
298 status, disabilities, housing arrangements, or armed forces history). Health information will be  
299 used to develop and improve the DMS application and user experience. The DMS and associated  
300 third-party vendors are compliant with the General Data Protection Regulation (GDPR), and all  
301 accessed health information will be maintained in the strictest confidence and in compliance with  
302 the GDPR. Data from the DMS are encrypted in activity and rest and will be accessed only by  
303 role-specific individuals for discrete time periods and functions (eg, technical troubleshooting).  
304 All data will be completely anonymized for graphical, statistical, and publication purposes.

305 Research staff from NHS sites will store consent documents, demographic forms, and receipts  
306 for reimbursement of travel in locked filing cabinets to which only research staff will have  
307 access. Accessing of health data will be compliant with IG policies of each participating NHS  
308 trust.

### 309 **Ethical considerations**

310 Ethics approval for this study was o  
311 btained from London - City & East Research Ethics Committee (REC Ref no. 18/LO/0128), and  
312 clinical trial authorization was provided by the Medicines and Healthcare products Regulatory

Study Protocol for DMS use for schizophrenia in the UK  
Revised to address Peer-review

313 Agency. Written informed consent will be obtained from every participant. Ethical issues will be  
314 related to the identification and recruitment of patients, informed consent, and data protection  
315 arrangements. The trial will be conducted in compliance with the International Council for  
316 Harmonisation of Technical Requirements for Pharmaceuticals for Human Use guidelines and  
317 Declaration of Helsinki.

### 318 **Dissemination of study results**

319 The study results will be disseminated through peer-reviewed publications, national and  
320 international conference presentations, and formal clinical trial repositories (eg,  
321 ClinicalTrials.gov). The 5 participating NHS sites will be invited to a results launch event.  
322 Results will be shared with individuals who participated in the workshops via the respective  
323 trusts. Additionally, follow-up workshops are planned to capture further feedback on next steps  
324 for scaling the DMS technology.

### 325 **DISCUSSION**

326 Patient adherence to antipsychotic medication is a crucial component of successful maintenance  
327 therapy for schizophrenia. Knowledge of patient adherence in the absence of positive treatment  
328 outcome is also essential. Subjective means for assessing medication adherence such as clinician  
329 evaluation and patient self-report have low validity [16], and most can only be administered  
330 during patient-HCP visits. Digital medicine offers a means to monitor patient adherence and  
331 obtain objective data throughout treatment, including periods between office visits, which may  
332 yield more accurate data. For example, a study evaluating nonadherence rates for antipsychotic  
333 medication based on electronic medication bottle caps, which report when pill bottles have been  
334 opened [18], showed a 57% nonadherence rate, much higher than that estimated by patient (5%)

Study Protocol for DMS use for schizophrenia in the UK  
Revised to address Peer-review

1  
2  
3 335 and provider (7%) report [18]. Electronic medication bottle caps are used as the current gold-  
4  
5 336 standard surrogate for ‘objective’ adherence data. Few reports in this space exist and the need for  
6  
7 337 more robust objective adherence data is supported through this discrepancy and the limitations of  
8  
9 338 electronic medication bottle caps as an ‘objective’ measure, given it only measures an  
10  
11 339 intermediate step in the ingestion process. This study shows the potential of digital medicine to  
12  
13 340 provide continuous objective data that can inform and improve patient adherence and assist in  
14  
15 341 clinical decision making. The DMS improves upon approaches such as electronic medication  
16  
17 342 caps by providing an objective marker of ingestion and not merely a surrogate in addition to  
18  
19 343 other objective and subjective data.  
20  
21  
22  
23

24 344 Patient discontinuation is a considerable problem in studies of digital health technology [26].  
25  
26 345 Studies of early digital health systems for maintenance and counseling of mental disorders  
27  
28 346 reported low completion rates. For example, a study evaluating a 12-week web-based cognitive  
29  
30 347 behavioral therapy intervention for panic disorder had a 1% (12/1161) completion rate [27], and  
31  
32 348 a study evaluating a publicly accessible 5-module web-based cognitive behavioral therapy  
33  
34 349 program for anxiety and depression had a 0.5% completion rate (97/19,607) [28]. Completion  
35  
36 350 rates may be particularly low in patients with more severe negative symptoms [22]. Despite these  
37  
38 351 historically poor completion rates in studies of digital health platforms, results of a meta-analysis  
39  
40 352 indicate that more than 50% of patients favor managing their mental health through the use of  
41  
42 353 mobile health technology [29], and the use of mobile devices for health management is viewed  
43  
44 354 by patients as normalized and nonstigmatizing [30]. The integrated DMS described here was  
45  
46 355 developed to leverage the advantages of digital technology to positively influence adherence in  
47  
48 356 patients with schizophrenia.  
49  
50  
51  
52  
53  
54  
55  
56  
57  
58  
59  
60

Study Protocol for DMS use for schizophrenia in the UK  
Revised to address Peer-review

1  
2  
3 357 The DMS is a multimodal, user-friendly system that provides medication reminders and  
4  
5 358 measures patient ingestion of prescribed antipsychotic medications. The CoE product, in  
6  
7 359 particular, advances the ability to confirm medication ingestion and to assess adherence on a  
8  
9 360 continuous basis, which can inform whether uncontrolled symptoms may be explained by  
10  
11 361 nonadherence. Information from the DMS is made readily available to patients, caregivers (with  
12  
13 362 the patient's consent), and physicians for supported decision making, proactive intervention, and  
14  
15 363 individualized care. DMS also provides adherence feedback electronically to the patient, HCP,  
16  
17 364 and/or caregiver. The DMS provides this feedback discreetly, through user-owned and operated  
18  
19 365 applications and a patch that is not readily visible as it is worn on the torso underneath clothing,  
20  
21 366 reducing any potential stigmatization if it (the patch) was visible. The DMS also provides  
22  
23 367 feedback on activity and rest levels, which is important given that maintenance of a healthy  
24  
25 368 lifestyle can help address the problems of weight gain and obesity that are related to both  
26  
27 369 medication side effects and sedentary lifestyles [31]. Furthermore, shifts in activity levels may be  
28  
29 370 indicative of altered patient disposition.  
30  
31  
32  
33  
34  
35

36 371 This ongoing study was designed using coproduction methodology to incorporate input from  
37  
38 372 patients, caregivers, psychiatrists, pharmacists, nurses, and researchers. For all 5 study sites, a  
39  
40 373 minimum of 2 engagement/setup meetings were conducted and 2 specific patient focus groups  
41  
42 374 were held to guide protocol development and app design. The exploratory data collected in this  
43  
44 375 study, although limited to a small number of patients, will help provide a better understanding of  
45  
46 376 the ease of use for patients, HCPs, and caregivers to inform the development of future software  
47  
48 377 or hardware iterations.  
49  
50  
51

52  
53 378 Given the level of unfamiliarity with digital medicine systems, conducting clinical trials in this  
54  
55 379 space requires a higher level of stakeholder management and alignment, especially when the trial  
56  
57  
58  
59  
60

Study Protocol for DMS use for schizophrenia in the UK  
Revised to address Peer-review

1  
2  
3 380 is being held in a new environment. Whether it's a new country, a new healthcare system, or a  
4  
5 381 new set of investigators, formal buy-in and input is critical to participation. The protocol outlines  
6  
7 382 one way of managing and aligning stakeholders in such an environment - the UK mental health  
8  
9 383 system. Additionally, and increasingly important within mental health services and interventions  
10  
11 384 in the UK, is the involvement of end-users, so called service users who have lived experience of  
12  
13 385 mental health. The methods paper describes a robust engagement strategy using such individuals  
14  
15 386 in mental health research.  
16  
17  
18  
19

20 387 Digital health interventions require significant clinician and patient engagement. The protocol  
21  
22 388 describes an approach to ensure that service users of a digital medicine intervention can assist  
23  
24 389 with protocol design and system input e.g. approach and appropriate language  
25  
26  
27  
28

## 29 390 **CONCLUSION**

30  
31 391 In conclusion, this study will examine the usability and acceptance of the DMS by patients with  
32  
33 392 schizophrenia, schizoaffective disorder, or first-episode psychosis, and by caregivers and HCPs  
34  
35 393 in different care settings. The study was meticulously coproduced through the engagement of all  
36  
37 394 stakeholders and, if successful, could be used to support DMS usage in larger cohorts within the  
38  
39 395 United Kingdom and Europe.  
40  
41  
42  
43

44 396

## 45 397 **Funding statement**

46  
47  
48 398 This study is supported by Otsuka Pharmaceutical Development & Commercialization, Inc.  
49  
50 399 Editorial support for development of this manuscript was provided by Eric Comeau, PhD, at C4  
51  
52 400 MedSolutions, LLC (Yardley, PA), a CHC Group company, and funded by Otsuka  
53  
54 401 Pharmaceutical Development & Commercialization, Inc.  
55  
56  
57  
58  
59  
60



Study Protocol for DMS use for schizophrenia in the UK  
Revised to address Peer-review

## 402 **Competing interests statement**

403 Dr J. Corey Fowler, Dr Jonathan Knights, and Dr Tim Peters-Strickland are employees of Otsuka  
404 Pharmaceutical Development & Commercialization. Dr Nathan Cope is an employee of Otsuka  
405 Pharmaceutical Europe Ltd. Dr Andrew Makin is an employee of Otsuka Europe Development  
406 and Commercialisation. Dr Peter Phiri has no conflict of interest. Dr Shanaya Rathod has  
407 received honoraria from Otsuka and Lundbeck for educational sessions.

## 408 **Author contributions**

409 JCF, NC, JK, PP, AM, TP-S and SR contributed to study conception and design as well as data  
410 collection, analysis, and interpretation; JCF, NC, JK, PP, AM, TP-S and SR were responsible for  
411 review and critical revision of the manuscript; and JCF, NC, JK, PP, AM, TP-S and SR gave  
412 final approval to submit for publication.

## 413 **Acknowledgements**

414 The authors thank patient advisers and NHS staff from all 5 participating sites (Oxford Health  
415 NHS Foundation Trust; Northumberland, Tyne and Wear NHS Foundation Trust; Southern  
416 Health NHS Foundation Trust; South London and Maudsley NHS Foundation Trust; and Surrey  
417 and Borders Partnership NHS Foundation Trust) for their contributions to the study  
418 methodology. Editorial support for development of this manuscript was provided by Eric  
419 Comeau at C4 MedSolutions, LLC (Yardley, PA, USA), a CHC Group company, and funded by  
420 Otsuka Pharmaceutical Development & Commercialization, Inc.

421

Study Protocol for DMS use for schizophrenia in the UK  
Revised to address Peer-review

## 422 REFERENCES

- 423 1. World Health Organization. 2008. The Global Burden of Disease: 2004 update.  
424 [http://www.who.int/healthinfo/global\\_burden\\_disease/GBD\\_report\\_2004update\\_full.pdf?](http://www.who.int/healthinfo/global_burden_disease/GBD_report_2004update_full.pdf?ua=1)  
425 [ua=1](http://www.who.int/healthinfo/global_burden_disease/GBD_report_2004update_full.pdf?ua=1). (accessed June 29, 2018).
- 426 2. Rathod S, Garner C, Griffiths A, et al. Protocol for a multicentre study to assess  
427 feasibility, acceptability, effectiveness and direct costs of TRIumPH (Treatment and  
428 Recovery In Psychosis): integrated care pathway for psychosis. *BMJ Open*  
429 2016;6:e012751. doi:10.1136/bmjopen-2016-012751
- 430 3. Gustavsson A, Svensson M, Jacobi F, et al. Cost of disorders of the brain in Europe 2010.  
431 *Eur Neuropsychopharmacol* 2011;21:718-79. doi:10.1016/j.euroneuro.2011.08.008
- 432 4. Hasan A, Falkai P, Wobrock T, et al. World Federation of Societies of Biological  
433 Psychiatry (WFSBP) guidelines for biological treatment of schizophrenia, part 2: update  
434 2012 on the long-term treatment of schizophrenia and management of antipsychotic-  
435 induced side effects. *World J Biol Psychiatry* 2013;14:2-44.  
436 doi:10.3109/15622975.2012.739708
- 437 5. Kreyenbuhl J, Dixon LB, McCarthy JF, et al. Does adherence to medications for type 2  
438 diabetes differ between individuals with vs without schizophrenia? *Schizophr Bull*  
439 2010;36:428-35. doi:10.1093/schbul/sbn106
- 440 6. Isett KR, Burnam MA, Coleman-Beattie B, et al. The state policy context of  
441 implementation issues for evidence-based practices in mental health. *Psychiatr Serv*  
442 2007;58:914-21. doi:10.1176/appi.ps.58.7.914
- 443 7. Ismail Z, Peters-Strickland T, Miguelez M, et al. Aripiprazole once-monthly in the  
444 treatment of acute psychotic episodes in schizophrenia: post hoc analysis of Positive and

Study Protocol for DMS use for schizophrenia in the UK  
Revised to address Peer-review

- 1  
2  
3 445 Negative Syndrome Scale Marder factor scores. *J Clin Psychopharmacol* 2017;37:347-  
4  
5 446 50. doi:10.1097/JCP.0000000000000710  
6  
7  
8 447 8. Potkin SG, Loze JY, Forray C, et al. Multidimensional assessment of functional  
9  
10 448 outcomes in schizophrenia: results from QUALIFY, a head-to-head trial of aripiprazole  
11  
12 449 once-monthly and paliperidone palmitate. *Int J Neuropsychopharmacol* 2017;20:40-9.  
13  
14 450 doi:10.1093/ijnp/pyw093  
15  
16  
17 451 9. Rathod S, Kingdon D, Smith P, et al. Insight into schizophrenia: the effects of cognitive  
18  
19 452 behavioural therapy on the components of insight and association with  
20  
21 453 sociodemographics--data on a previously published randomised controlled trial.  
22  
23 454 *Schizophr Res* 2005;74:211-9. doi:10.1016/j.schres.2004.07.003  
24  
25  
26 455 10. Sendt KV, Tracy DK, Bhattacharyya S. A systematic review of factors influencing  
27  
28 456 adherence to antipsychotic medication in schizophrenia-spectrum disorders. *Psychiatry*  
29  
30 457 *Res* 2015;225:14-30.  
31  
32  
33 458 11. Lieberman JA, Stroup TS, McEvoy JP, et al. Effectiveness of antipsychotic drugs in  
34  
35 459 patients with chronic schizophrenia. *N Engl J Med* 2005;353:1209-23.  
36  
37 460 doi:10.1056/NEJMoa051688  
38  
39  
40 461 12. Morken G, Widen JH, Grawe RW. Non-adherence to antipsychotic medication, relapse  
41  
42 462 and rehospitalisation in recent-onset schizophrenia. *BMC Psychiatry* 2008;8:32.  
43  
44  
45 463 13. Cutler RL, Fernandez-Llimos F, Frommer M, et al. Economic impact of medication non-  
46  
47 464 adherence by disease groups: a systematic review. *BMJ Open* 2018;8:e016982.  
48  
49 465 doi:10.1136/bmjopen-2017-016982  
50  
51 466 14. McCrone P, Dhanasiri S, Patel A, et al. Paying the Price: The Cost of Mental Health Care  
52  
53 467 in England to 2026. London: King's Fund 2008.

Study Protocol for DMS use for schizophrenia in the UK  
Revised to address Peer-review

- 1  
2  
3 468 15. Gray R, Bressington D, Ivanecka A, et al. Is adherence therapy an effective adjunct  
4  
5 469 treatment for patients with schizophrenia spectrum disorders? A systematic review and  
6  
7 470 meta-analysis. *BMC Psychiatry* 2016;16:90. doi:10.1186/s12888-016-0801-1  
8  
9  
10 471 16. Haddad PM, Brain C, Scott J. Nonadherence with antipsychotic medication in  
11  
12 472 schizophrenia: challenges and management strategies. *Patient Relat Outcome Meas*  
13  
14 473 2014;5:43-62. doi:10.2147/PROM.S42735  
15  
16  
17 474 17. Gutierrez PM, Wortzel HS, Forster JE, et al. Blister packaging medication increases  
18  
19 475 treatment adherence in psychiatric patients. *J Psychiatr Pract* 2017;23:320-7.  
20  
21  
22 476 18. Byerly MJ, Thompson A, Carmody T, et al. Validity of electronically monitored  
23  
24 477 medication adherence and conventional adherence measures in schizophrenia. *Psychiatr*  
25  
26 478 *Serv* 2007;58:844-7.  
27  
28 479 19. Ben-Zeev D, McHugo GJ, Xie H, et al. Comparing retrospective reports to real-time/real-  
29  
30 480 place mobile assessments in individuals with schizophrenia and a nonclinical comparison  
31  
32 481 group. *Schizophr Bull* 2012;38:396-404. doi:10.1093/schbul/sbr171  
33  
34  
35 482 20. Oorschot M, Lataster T, Thewissen V, et al. Mobile assessment in schizophrenia: a data-  
36  
37 483 driven momentary approach. *Schizophr Bull* 2012;38:405-13. doi:10.1093/schbul/sbr166  
38  
39  
40 484 21. Kimhy D, Delespaul P, Corcoran C, et al. Computerized experience sampling method  
41  
42 485 (ESMc): assessing feasibility and validity among individuals with schizophrenia. *J*  
43  
44 486 *Psychiatr Res* 2006;40:221-30. doi:10.1016/j.jpsychires.2005.09.007  
45  
46  
47 487 22. Granholm E, Ben-Zeev D, Link PC, et al. Mobile Assessment and Treatment for  
48  
49 488 Schizophrenia (MATS): a pilot trial of an interactive text-messaging intervention for  
50  
51 489 medication adherence, socialization, and auditory hallucinations. *Schizophr Bull*  
52  
53 490 2012;38:414-25.  
54  
55  
56  
57  
58  
59

Study Protocol for DMS use for schizophrenia in the UK  
Revised to address Peer-review

- 1  
2  
3 491 23. Rohatagi S, Profit D, Hatch A, et al. Optimization of a digital medicine system in  
4  
5 492 psychiatry. *J Clin Psychiatry* 2016;77:e1101-e7.  
6  
7  
8 493 24. Peters-Strickland T, Pestreich L, Hatch A, Rohatagi S, Baker A, Docherty J,  
9  
10 494 Markovtsova L, Raja P, Weiden P, Walling D. Usability of a novel digital medicine  
11  
12 495 system in adults with schizophrenia treated with sensor-embedded tablets of aripiprazole.  
13  
14 496 *Neuropsychiatr Dis Treat*. 2016, 12: 2587–2594.  
15  
16  
17 497 25. Kopelowicz A, Baker RA, Zhao C, et al. A multicenter, open-label, pilot study evaluating  
18  
19 498 the functionality of an integrated call center for a digital medicine system to optimize  
20  
21 499 monitoring of adherence to oral aripiprazole in adult patients with serious mental illness.  
22  
23 500 *Neuropsychiatr Dis Treat* 2017;13:2641-51. doi:10.2147/NDT.S143091  
24  
25  
26 501 26. Eysenbach G. The law of attrition. *J Med Internet Res* 2005;7:e11.  
27  
28 502 27. Farvolden P, Denisoff E, Selby P, et al. Usage and longitudinal effectiveness of a web-  
29  
30 503 based self-help cognitive behavioral therapy program for panic disorder. *J Med Internet*  
31  
32 504 *Res* 2005;7:e7. doi:10.2196/jmir.7.1.e7  
33  
34  
35 505 28. Christensen H, Griffiths KM, Korten AE, et al. A comparison of changes in anxiety and  
36  
37 506 depression symptoms of spontaneous users and trial participants of a cognitive behavior  
38  
39 507 therapy website. *J Med Internet Res* 2004;6:e46. doi:10.2196/jmir.6.4.e46  
40  
41  
42 508 29. Firth J, Cotter J, Torous J, et al. Mobile phone ownership and endorsement of "mHealth"  
43  
44 509 among people with psychosis: a meta-analysis of cross-sectional studies. *Schizophr Bull*  
45  
46 510 2016;42:448-55. doi:10.1093/schbul/sbv132  
47  
48  
49 511 30. Palmier-Claus JE, Rogers A, Ainsworth J, et al. Integrating mobile-phone based  
50  
51 512 assessment for psychosis into people's everyday lives and clinical care: a qualitative  
52  
53 513 study. *BMC Psychiatry* 2013;13:34.  
54  
55  
56  
57  
58  
59  
60

Study Protocol for DMS use for schizophrenia in the UK  
Revised to address Peer-review

- 1  
2  
3 514 31. Gossage-Worrall R, Holt RI, Barnard K, et al. STEPWISE - STructured lifestyle  
4  
5 515 Education for People With SchizophrEnia: a study protocol for a randomised controlled  
6  
7 516 trial. *Trials* 2016;17:475. doi:10.1186/s13063-016-1572-1  
8  
9  
10  
11 517  
12  
13 518  
14  
15  
16  
17  
18  
19  
20  
21  
22  
23  
24  
25  
26  
27  
28  
29  
30  
31  
32  
33  
34  
35  
36  
37  
38  
39  
40  
41  
42  
43  
44  
45  
46  
47  
48  
49  
50  
51  
52  
53  
54  
55  
56  
57  
58  
59  
60

Study Protocol for DMS use for schizophrenia in the UK  
Revised to address Peer-review

1  
2  
3 **519 Figure Legends**

4  
5 **520 Figure 1.** Digital medicine system: co-encapsulated antipsychotic medication with miniature  
6  
7 **521** ingestible event marker in tablet (MIT) and compatible medical device. DM=digital medicine;  
8  
9 **522** HCP=healthcare professional. Image reprinted from article in npg Digital Medicine [In Press].  
10  
11

12  
13 **523 Figure 2.** Description of coproduction workshops with Southern Health NHS Foundation Trust.  
14  
15 **524** DMS=digital medicine system; EIP=Early Intervention in Psychosis; IG=information  
16  
17 **525** governance; MoSCoW=must have, should have, could have, won't have; NHS=National Health  
18  
19 **526** Service; PANSS=Positive and Negative Syndrome Scale; PPI=Patient and Public Involvement  
20  
21 **527** program.  
22  
23

24  
25 **528 Figure 3.** Study design.  
26  
27  
28  
29  
30  
31  
32  
33  
34  
35  
36  
37  
38  
39  
40  
41  
42  
43  
44  
45  
46  
47  
48  
49  
50  
51  
52  
53  
54  
55  
56  
57  
58  
59  
60

1  
2  
3  
4  
5  
6  
7  
8  
9  
10  
11  
12  
13  
14  
15  
16  
17  
18  
19  
20  
21  
22  
23  
24  
25  
26  
27  
28  
29  
30  
31  
32  
33  
34  
35  
36  
37  
38  
39  
40  
41  
42  
43  
44  
45  
46  
47  
48  
49  
50  
51  
52  
53  
54  
55  
56  
57  
58  
59  
60

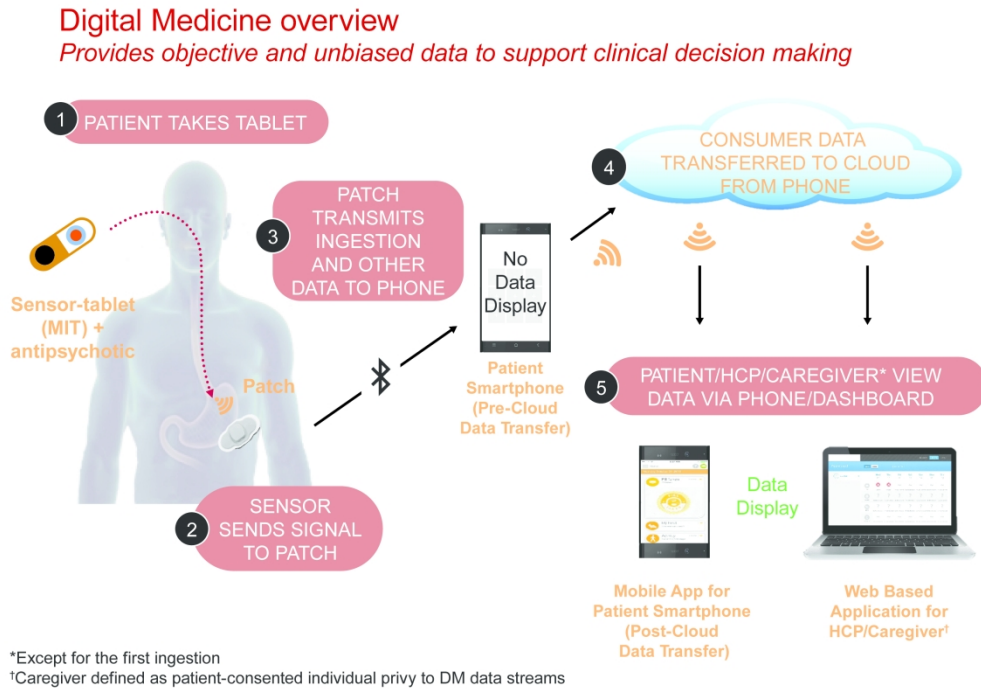

Figure 1. Digital medicine system: co-encapsulated antipsychotic medication with miniature ingestible event marker in tablet (MIT) and compatible medical device. DM=digital medicine; HCP=healthcare professional.

254x177mm (300 x 300 DPI)



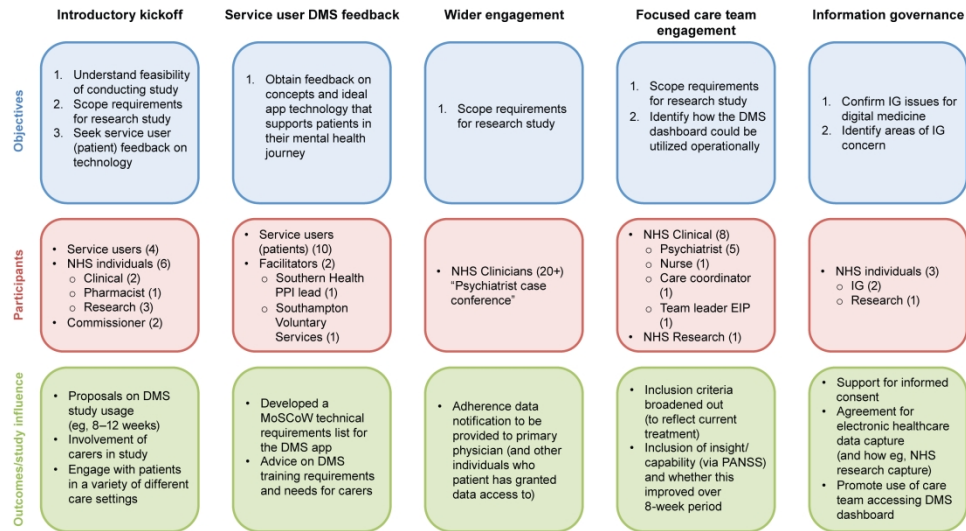

Figure 2. Description of coproduction workshops with Southern Health NHS Foundation Trust. DMS=digital medicine system; EIP=Early Intervention in Psychosis; IG=information governance; MoSCoW=must have, should have, could have, won't have; NHS=National Health Service; PANSS=Positive and Negative Syndrome Scale; PPI=Patient and Public Involvement program.

317x184mm (300 x 300 DPI)

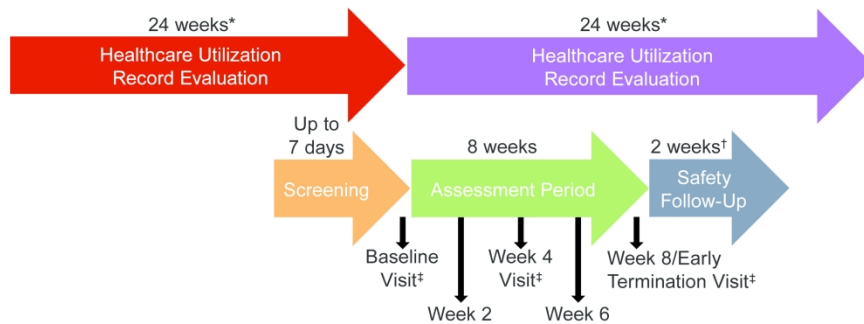

Healthcare professionals (HCPs) will review dashboard at weeks 2, 4, 6, and 8 and make treatment changes at their discretion.  
 \*Healthcare utilization will be recorded 24 weeks before and after baseline visit (for a total of 48 weeks).  
 †Safety follow-up phone call will occur 2 weeks after week 8/early termination visit.  
 ‡Patient visits will occur at baseline, week 4, and week 8/early termination. Other visits will be at the discretion of the HCP.

Figure 3. Study design.

241x108mm (300 x 300 DPI)

## Supplementary Material

### Supplemental Figure 1. Subject Usability and Satisfaction Scale (Ver 2.0)

#### Section A: Usability

##### 1. How easy or difficult was it for you to apply the patch on your body?

| Extremely Difficult | Difficult | Somewhat Difficult | Neutral | Somewhat Easy | Easy | Extremely Easy |
|---------------------|-----------|--------------------|---------|---------------|------|----------------|
| 1                   | 2         | 3                  | 4       | 5             | 6    | 7              |
|                     |           |                    |         |               |      |                |

##### 2. How easy or difficult was it to pair the patch with the mobile phone application (app)?

| Extremely Difficult | Difficult | Somewhat Difficult | Neutral | Somewhat Easy | Easy | Extremely Easy |
|---------------------|-----------|--------------------|---------|---------------|------|----------------|
| 1                   | 2         | 3                  | 4       | 5             | 6    | 7              |
|                     |           |                    |         |               |      |                |

##### 3. How easy or difficult was it for you to use the mobile phone application (app)?

| Extremely Difficult | Difficult | Somewhat Difficult | Neutral | Somewhat Easy | Easy | Extremely Easy |
|---------------------|-----------|--------------------|---------|---------------|------|----------------|
| 1                   | 2         | 3                  | 4       | 5             | 6    | 7              |
|                     |           |                    |         |               |      |                |

##### 4. How easy or difficult was it for you to use the Digital Medicine System?

| Extremely Difficult | Difficult | Somewhat Difficult | Neutral | Somewhat Easy | Easy | Extremely Easy |
|---------------------|-----------|--------------------|---------|---------------|------|----------------|
| 1                   | 2         | 3                  | 4       | 5             | 6    | 7              |
|                     |           |                    |         |               |      |                |

##### 5. How well do you agree with the following statement?

- In general, I did not mind wearing the patch.

| Strongly Disagree | Disagree | Somewhat Disagree | Neutral | Somewhat Agree | Agree | Strongly Agree |
|-------------------|----------|-------------------|---------|----------------|-------|----------------|
| 1                 | 2        | 3                 | 4       | 5              | 6     | 7              |
|                   |          |                   |         |                |       |                |

|  |  |  |  |  |  |  |
|--|--|--|--|--|--|--|
|  |  |  |  |  |  |  |
|--|--|--|--|--|--|--|

**6. Since your last visit, did you receive assistance when changing and pairing the required patches? Yes No**

If yes,

|                                                                  | Never | Once a month or less | A few times a month | Once a week | A few times a week | Daily |
|------------------------------------------------------------------|-------|----------------------|---------------------|-------------|--------------------|-------|
| How much assistance did you receive when applying the patches?   |       |                      |                     |             |                    |       |
| How much assistance did you receive when syncing the technology? |       |                      |                     |             |                    |       |

If you did receive any help or assistance, who helped or assisted you?  
(please place a √ [check] to indicate who helped or assisted you)

| Friend | Hired Caregiver | Relative* | Other** |
|--------|-----------------|-----------|---------|
|        |                 |           |         |

\*If a relative helped or assisted you, then please specify their relationship to you (such as wife, husband, father, mother, sister, brother, or whatever else you think is the most appropriate description of the relative who helped you): \_\_\_\_\_

\*\*If you selected "Other", please specify your relationship to the person who helped you  
\_\_\_\_\_

**Section B: Satisfaction**

**7. How easy or difficult was it for you to use the entire Digital Medicine System, which includes the patch, pills, and mobile phone application (app)?**

| Extremely Difficult | Difficult | Somewhat Difficult | Neutral | Somewhat Easy | Easy | Extremely Easy |
|---------------------|-----------|--------------------|---------|---------------|------|----------------|
| 1                   | 2         | 3                  | 4       | 5             | 6    | 7              |
|                     |           |                    |         |               |      |                |

8. How helpful or unhelpful was the Digital Medicine System in the management of your condition?

| Extremely Unhelpful | Unhelpful | Somewhat Unhelpful | Neutral | Somewhat Helpful | Helpful | Extremely Helpful |
|---------------------|-----------|--------------------|---------|------------------|---------|-------------------|
| 1                   | 2         | 3                  | 4       | 5                | 6       | 7                 |
|                     |           |                    |         |                  |         |                   |

9. How helpful or unhelpful was the Digital Medicine System for sharing information with your healthcare professionals to help you understand your treatment plan?

| Extremely Unhelpful | Unhelpful | Somewhat Unhelpful | Neutral | Somewhat Helpful | Helpful | Extremely Helpful |
|---------------------|-----------|--------------------|---------|------------------|---------|-------------------|
| 1                   | 2         | 3                  | 4       | 5                | 6       | 7                 |
|                     |           |                    |         |                  |         |                   |

10. How helpful or unhelpful was the Digital Medicine System in improving your discussions with your doctor / treatment team?

| Extremely Unhelpful | Unhelpful | Somewhat Unhelpful | Neutral | Somewhat Helpful | Helpful | Extremely Helpful |
|---------------------|-----------|--------------------|---------|------------------|---------|-------------------|
| 1                   | 2         | 3                  | 4       | 5                | 6       | 7                 |
|                     |           |                    |         |                  |         |                   |

11. Based on your experience, how would you rate your satisfaction with the Digital Medicine System?

| Extremely Dissatisfied | Dissatisfied | Somewhat Dissatisfied | Neutral | Somewhat Satisfied | Satisfied | Extremely Satisfied |
|------------------------|--------------|-----------------------|---------|--------------------|-----------|---------------------|
| 1                      | 2            | 3                     | 4       | 5                  | 6         | 7                   |
|                        |              |                       |         |                    |           |                     |

12. How likely would you be to use the Digital Medicine System in the future, if it were available and recommended by your doctor?

| Extremely Unlikely | Unlikely | Somewhat Unlikely | Neutral | Somewhat Likely | Likely | Extremely Likely |
|--------------------|----------|-------------------|---------|-----------------|--------|------------------|
| 1                  | 2        | 3                 | 4       | 5               | 6      | 7                |
|                    |          |                   |         |                 |        |                  |

## Supplemental Figure 2. Physician Utility Survey (Ver 2.0)

We ask the Principal Investigator, Physician Investigator, and Trial Coordinator(s) at a clinical site/trust to complete this survey for each patient enrolled. Please answer the below questions based on your overall experience using DMS.

### 1. How easy or difficult was it for you and your patient to apply the patch on the patient's body?

|                  | Extremel<br>y Difficult | Difficult | Somewhat<br>Difficult | Neutral | Somewhat<br>Easy | Easy | Extremely<br>Easy |
|------------------|-------------------------|-----------|-----------------------|---------|------------------|------|-------------------|
|                  | 1                       | 2         | 3                     | 4       | 5                | 6    | 7                 |
| For you          |                         |           |                       |         |                  |      |                   |
| For your patient |                         |           |                       |         |                  |      |                   |

### 2. How easy or difficult was it for you and your patient to sync the patch with the mobile phone application (app)?

|                  | Extremel<br>y Difficult | Difficult | Somewhat<br>Difficult | Neutral | Somewhat<br>Easy | Easy | Extremely<br>Easy |
|------------------|-------------------------|-----------|-----------------------|---------|------------------|------|-------------------|
|                  | 1                       | 2         | 3                     | 4       | 5                | 6    | 7                 |
| For you          |                         |           |                       |         |                  |      |                   |
| For your patient |                         |           |                       |         |                  |      |                   |

### 3. How easy or difficult was it for you and your patient to complete the overall onboarding for the Digital Medicine System?

|                  | Extremel<br>y Difficult | Difficult | Somewhat<br>Difficult | Neutral | Somewhat<br>Easy | Easy | Extremely<br>Easy |
|------------------|-------------------------|-----------|-----------------------|---------|------------------|------|-------------------|
|                  | 1                       | 2         | 3                     | 4       | 5                | 6    | 7                 |
| For you          |                         |           |                       |         |                  |      |                   |
| For your patient |                         |           |                       |         |                  |      |                   |

### 4. Overall, how easy or difficult was it for you and your patient to use the mobile phone application (app)?

|                  | Extremel<br>y Difficult | Difficult | Somewhat<br>Difficult | Neutral | Somewhat<br>Easy | Easy | Extremely<br>Easy |
|------------------|-------------------------|-----------|-----------------------|---------|------------------|------|-------------------|
|                  | 1                       | 2         | 3                     | 4       | 5                | 6    | 7                 |
| For you          |                         |           |                       |         |                  |      |                   |
| For your patient |                         |           |                       |         |                  |      |                   |

### 5. Overall, how easy or difficult was it for you and your patient to use the entire Digital Medicine System, which includes the patch, pills, and mobile phone application (app)?

|                  | Extremel<br>y Difficult | Difficult | Somewhat<br>Difficult | Neutral | Somewhat<br>Easy | Easy | Extremel<br>y Easy |
|------------------|-------------------------|-----------|-----------------------|---------|------------------|------|--------------------|
|                  | 1                       | 2         | 3                     | 4       | 5                | 6    | 7                  |
| For you          |                         |           |                       |         |                  |      |                    |
| For your patient |                         |           |                       |         |                  |      |                    |

### 6. How easy or difficult was it for you to use the HCP dashboard?

| Extremely Difficult | Difficult | Somewhat Difficult | Neutral | Somewhat Easy | Easy | Extremely Easy |
|---------------------|-----------|--------------------|---------|---------------|------|----------------|
| 1                   | 2         | 3                  | 4       | 5             | 6    | 7              |

7. If you were in routine clinical practice (ie, in clinical practice without a study protocol), how helpful or unhelpful do you think the Digital Medicine System could be for the following elements of clinical management for this specific patient?

|                                 | Extremely Unhelpful | Unhelpful | Somewhat Unhelpful | Neutral | Somewhat Helpful | Helpful | Extremely Helpful |
|---------------------------------|---------------------|-----------|--------------------|---------|------------------|---------|-------------------|
|                                 | 1                   | 2         | 3                  | 4       | 5                | 6       | 7                 |
| Assessment                      |                     |           |                    |         |                  |         |                   |
| Clinical Advice/Recommendations |                     |           |                    |         |                  |         |                   |
| Treatment Decisions             |                     |           |                    |         |                  |         |                   |

8. How effective was the Digital Medicine System in aiding decision-making for medication adherence?

| Extremely Not Effective | Not Effective to Use | Somewhat Not Effective to Use | Neutral | Somewhat Effective to Use | Effective to Use | Extremely Effective to Use |
|-------------------------|----------------------|-------------------------------|---------|---------------------------|------------------|----------------------------|
| 1                       | 2                    | 3                             | 4       | 5                         | 6                | 7                          |

9. How helpful or unhelpful was the Digital Medicine System in providing a way to better engage your patients in self-management of their condition?

| Extremely Unhelpful | Unhelpful | Somewhat Unhelpful | Neutral | Somewhat Helpful | Helpful | Extremely Helpful |
|---------------------|-----------|--------------------|---------|------------------|---------|-------------------|
| 1                   | 2         | 3                  | 4       | 5                | 6       | 7                 |

10. How helpful or unhelpful was the Digital Medicine System in improving quality of care for your patient?

| Extremely Unhelpful | Unhelpful | Somewhat Unhelpful | Neutral | Somewhat Helpful | Helpful | Extremely Helpful |
|---------------------|-----------|--------------------|---------|------------------|---------|-------------------|
| 1                   | 2         | 3                  | 4       | 5                | 6       | 7                 |

**11. How helpful or unhelpful was the Digital Medicine System in improving your conversations with your patient about their treatment plan and progress?**

| Extremely Unhelpful | Unhelpful | Somewhat Unhelpful | Neutral | Somewhat Helpful | Helpful | Extremely Helpful |
|---------------------|-----------|--------------------|---------|------------------|---------|-------------------|
| 1                   | 2         | 3                  | 4       | 5                | 6       | 7                 |
|                     |           |                    |         |                  |         |                   |

**12. How helpful or unhelpful was the Digital Medicine System in the identification of potential lifestyle changes for your patient (eg sleep and exercise)?**

| Extremely Unhelpful | Unhelpful | Somewhat Unhelpful | Neutral | Somewhat Helpful | Helpful | Extremely Helpful |
|---------------------|-----------|--------------------|---------|------------------|---------|-------------------|
| 1                   | 2         | 3                  | 4       | 5                | 6       | 7                 |
|                     |           |                    |         |                  |         |                   |

**13. Other than during the patient visit(s), did you look at the HCP dashboard at other times? Please select all that apply**

|                                            | Place a $\checkmark$ (check) next to the time you referred to the HCP dashboard |
|--------------------------------------------|---------------------------------------------------------------------------------|
| No, only during the patient visit          |                                                                                 |
| Prior to patient visit (same day as visit) |                                                                                 |
| In between visits                          |                                                                                 |
| Other: <i>Please Specify:</i> _____        |                                                                                 |

**14. What features did you find helpful? Please select all that apply**

|                                               | Place a $\checkmark$ (check) next to the features you found helpful | For the features you have selected, please rank these features from 1 (most helpful) to 7 (least helpful) in order of helpfulness |
|-----------------------------------------------|---------------------------------------------------------------------|-----------------------------------------------------------------------------------------------------------------------------------|
| Pill ingestion data                           |                                                                     |                                                                                                                                   |
| Patient reported reason code for missed doses |                                                                     |                                                                                                                                   |
| Multiple dose alerts                          |                                                                     |                                                                                                                                   |
| Missed dose alerts                            |                                                                     |                                                                                                                                   |
| Activity                                      |                                                                     |                                                                                                                                   |
| Rest                                          |                                                                     |                                                                                                                                   |
| Patient reported rest quality rating          |                                                                     |                                                                                                                                   |
| Other: <i>Please Specify:</i><br>_____        |                                                                     |                                                                                                                                   |



1  
2  
3 **15. Did you set up alerts to be notified of missed doses? Yes/no**

4 **a. If yes, based on your overall experience, how helpful were the missed dose**  
5 **alerts?**

| Extremely Unhelpful | Unhelpful | Somewhat Unhelpful | Neutral | Somewhat Helpful | Helpful | Extremely Helpful | Not Applicable – No alerts received |
|---------------------|-----------|--------------------|---------|------------------|---------|-------------------|-------------------------------------|
| 1                   | 2         | 3                  | 4       | 5                | 6       | 7                 |                                     |
|                     |           |                    |         |                  |         |                   |                                     |

13  
14 15a. If you received a missed dose alert what action did you take, if any? (If none,  
15 please write N/A) \_\_\_\_\_

16 **16. Did you set up alerts to be notified of multiple doses? Yes/no**

17 **a. If yes, based on your overall experience, how helpful were the multiple dose**  
18 **alerts?**

| Extremely Unhelpful | Unhelpful | Somewhat Unhelpful | Neutral | Somewhat Helpful | Helpful | Extremely Helpful | Not Applicable – No alerts received |
|---------------------|-----------|--------------------|---------|------------------|---------|-------------------|-------------------------------------|
| 1                   | 2         | 3                  | 4       | 5                | 6       | 7                 |                                     |
|                     |           |                    |         |                  |         |                   |                                     |

26  
27 16a. If you received a multiple dose alert what action did you take, if any? (If none, please write  
28 N/A) \_\_\_\_\_

29  
30 **17. How well do you agree with the following statement?**

31 **a. Overall, the Digital Medicine System adds value to my practice.**

| Strongly Disagree | Disagree | Somewhat Disagree | Neutral | Somewhat Agree | Agree | Strongly Agree |
|-------------------|----------|-------------------|---------|----------------|-------|----------------|
| 1                 | 2        | 3                 | 4       | 5              | 6     | 7              |
|                   |          |                   |         |                |       |                |

38  
39 **18. Based on your overall experience with this patient, how would you rate your satisfaction with the**  
40 **Digital Medicine System?**

| Extremely Dissatisfied | Dissatisfied | Somewhat Dissatisfied | Neutral | Somewhat Satisfied | Satisfied | Extremely Satisfied |
|------------------------|--------------|-----------------------|---------|--------------------|-----------|---------------------|
| 1                      | 2            | 3                     | 4       | 5                  | 6         | 7                   |
|                        |              |                       |         |                    |           |                     |

1  
2  
3 **Supplemental Figure 3. Caregiver/Support Person Involvement Scale (Ver 2.0)**  
4  
5

6 **DMS Caregiver/Support Person Involvement Scale**  
7

- 8  
9  
10 **1. Are you aware that the study participant/patient is currently participating in the Digital**  
11 **Medicine study (check one)?**  
12

| Yes | No* |
|-----|-----|
|     |     |

13  
14  
15  
16  
17  
18 **\*If no, stop here and do not answer the rest of the questions on this form.**  
19

- 20  
21 **2. Indicate your relationship to the study participant/patient by placing a  $\surd$  (check).**  
22

| Friend | Hired Caregiver | Relative* | Other** |
|--------|-----------------|-----------|---------|
|        |                 |           |         |

23  
24  
25  
26  
27  
28 **\*If you are a relative, please specify relationship to the study participant/patient, e.g.,**  
29 **wife, father:**  
30

31 **\*\*If you selected "Other", please specify your relationship to the study**  
32 **participant/patient:**  
33  
34  
35  
36  
37  
38  
39  
40  
41  
42  
43  
44  
45  
46  
47  
48  
49  
50  
51  
52  
53  
54  
55  
56  
57  
58  
59  
60

---

1  
2  
3 **3. How much involvement did you provide the subject with regard to taking medication,**  
4 **pairing the patch, applying the patch, and using the app during the course of the**  
5 **study?**  
6  
7

|                                                                                         | Never | Once a month or less | A few times a month | Once a week      | A few times a week | Daily              |
|-----------------------------------------------------------------------------------------|-------|----------------------|---------------------|------------------|--------------------|--------------------|
| How much overall assistance did you provide the subject during the course of the study? |       |                      |                     |                  |                    |                    |
| How much assistance did you provide with patch application?                             |       |                      |                     |                  |                    |                    |
| How much assistance did you provide with syncing the technology?                        |       |                      |                     |                  |                    |                    |
| How much assistance did you provide with using the app?                                 |       |                      |                     |                  |                    |                    |
|                                                                                         | Never | Once a week          | A few times a week  | Nearly every day | Daily              | More than once/day |
| How much overall assistance did you provide during the past week of the study?          |       |                      |                     |                  |                    |                    |

33  
34  
35  
36 **Clinical Global Impression Scale**  
37

38  
39  
40 Clinical Global Impression – Severity Scale (CGI-S)  
41

42 Considering your total clinical experience with this particular population, how mentally ill is the  
43 patient at this time?  
44

45 0 = Not assessed

4 = Moderately ill

46  
47 1 = Normal, not at all ill

5 = Markedly ill

48  
49 2 = Borderline mentally ill

6 = Severely ill

50  
51 3 = Mildly ill

7 = Among the most extremely ill subjects  
52  
53  
54  
55  
56  
57  
58  
59  
60

#### Supplemental Figure 4. Personal and Social Performance Scale

Original version: Morosini PL, Magliano L, Brambilla L, et al. Development, reliability and acceptability of a new version of the DSM-IV Social and Occupational Functioning Assessment Scale (SOFAS) to assess routine social functioning. *Acta Psychiatr Scand* 2000;101(4):323-9  
Copyright © 2000 John Wiley & Sons, Inc. Reproduced with permission of Blackwell Publishing Ltd.

For peer review only

## Personal and Social Performance Scale (PSP)

The rating is based on four main areas: (a) socially useful activities, including work and study; (b) personal and social relationships; (c) self-care; and (d) disturbing and aggressive behaviors.

Data will be captured in the following format using the PSP descriptions provided below:

|                                                         | Absent                   | Mild                     | Manifest                 | Marked                   | Severe                   | Very Severe              |
|---------------------------------------------------------|--------------------------|--------------------------|--------------------------|--------------------------|--------------------------|--------------------------|
| a. Socially useful activities, including work and study | <input type="checkbox"/> |
| b. Personal and social relationships                    | <input type="checkbox"/> |
| c. Self-care                                            | <input type="checkbox"/> |
| d. Disturbing and aggressive behaviors                  | <input type="checkbox"/> |

The levels of functioning in other areas should be taken into account to adjust the rating inside the decimal level (for instance, from 31 to 40). Suicidal risk is not included in the scale.

| 10-point intervals | PSP descriptions                                                                                                                                                                                                                                             |
|--------------------|--------------------------------------------------------------------------------------------------------------------------------------------------------------------------------------------------------------------------------------------------------------|
| 100–91             | Excellent functioning in all four main areas*. He/she is held in high consideration for his/her good qualities, copes adequately with life problems, is involved in a wide range of interests and activities.                                                |
| 90–81              | Good functioning in all four main areas, presence of only common problems or difficulties.                                                                                                                                                                   |
| 80–71              | Mild difficulties in 1 or more of areas a–c.                                                                                                                                                                                                                 |
| 70–61              | Manifest, but not marked difficulties in 1 or more areas a–c, or mild difficulties in d.                                                                                                                                                                     |
| 60–51              | Marked difficulties in 1 of areas a–c, or manifest difficulties in d.                                                                                                                                                                                        |
| 50–41              | Marked difficulties in 2 or more, or severe difficulties in 1 of areas a–c, with or without manifest difficulties in d.                                                                                                                                      |
| 40–31              | Severe difficulties in 1 and marked difficulties in at least 1 of areas a–c, or marked difficulties in d.                                                                                                                                                    |
| 30–21              | Severe difficulties in 2 of areas a–c, or severe difficulties in d, with or without impairment in areas a–c.                                                                                                                                                 |
| 20–11              | Severe difficulties in all areas a–d, or very severe in d with or without impairment in general areas a–c. If the person reacts to external prompts the suggested scores are 20–16, if not, the suggested scores are 15–11.                                  |
| 10–1               | Lack of autonomy in basic functioning with extreme behaviors but without survival risk (ratings 6–10) or with survival risk, eg, death risk due to malnutrition, dehydration, infections, inability to recognize situation of manifest danger (ratings 5–1). |

**For main areas a–c, the degrees of severity are:**

|                          |                                                                                                                                                                                                                                                                                          |
|--------------------------|------------------------------------------------------------------------------------------------------------------------------------------------------------------------------------------------------------------------------------------------------------------------------------------|
| Absent                   |                                                                                                                                                                                                                                                                                          |
| Mild                     | Not manifest difficulties, known only to someone who is very familiar with the person.                                                                                                                                                                                                   |
| Manifest, but not marked | Difficulties clearly noticeable by everyone, but not interfering substantially with the person's ability to perform his/her role in that area, given the person's socio-cultural context, age, sex and educational levels.                                                               |
| Marked                   | Difficulties heavily interfering with role performance in that area; however, the person is still able to do something without professional or social help, although inadequately and/or occasionally; if helped by someone, he/she may be able reach the previous level of functioning. |
| Severe                   | Difficulties that make the person unable to perform any role in that area, if not professionally helped, or lead the person to a destructive role; however, there are no survival risks.                                                                                                 |
| Very severe              | Impairments and difficulties of such intensity to endanger person's survival.                                                                                                                                                                                                            |

**For general area d, the degrees of severity are:**

|                          |                                                                                                                                                                                |
|--------------------------|--------------------------------------------------------------------------------------------------------------------------------------------------------------------------------|
| Absent                   |                                                                                                                                                                                |
| Mild                     | Mild rudeness, unsociability or whingeing.                                                                                                                                     |
| Manifest, but not marked | Speaking too loudly or speaking to others in a too-familiar manner, or eating in a socially unacceptable manner.                                                               |
| Marked                   | Insulting other in public, breaking or wrecking objects, acting frequently in a socially inappropriate but not dangerous way (eg, stripping in public or urinating in public). |
| Severe                   | Frequent verbal threats or frequent physical assaults, without intention or possibility of severe injuries.                                                                    |
| Very severe              | Frequent aggressive acts, aimed at or likely to cause severe injuries.                                                                                                         |

Occasional is defined as occurring three or more times in the reference period or occurring even less than three times but in circumstances and/or with such a previous history to convince the rater that there is a risk of recurrence in the near future. If the aggressive behavior has been present occasionally, the rating may be decreased by one degree, eg, from severe to marked.

\* Main areas: a = socially useful activities, including work and study; b = personal and social relationships; c = self-care; d = disturbing and aggressive behaviors.

**Guidelines for PSP Total Score**

Ratings from 71–100 reflect only mild difficulties.

Ratings from 31–70 reflect manifest disabilities of various degrees.

Ratings from 1–30 reflect functioning so poor that intensive support or supervision is needed.

### Supplemental Figure 5. Patient Activation Measure-Mental Health Scale

The following questions ask about your feelings regarding your mental healthcare. When you think about mental health and mental health care, how much do you agree or disagree with the following statements? Please circle the answer that you most agree with:

1. When all is said and done, I am the person who is responsible for managing my mental health.

|                   |          |       |                |
|-------------------|----------|-------|----------------|
| 1                 | 2        | 3     | 4              |
| Strongly Disagree | Disagree | Agree | Strongly Agree |

2. Taking an active role in my own mental health is the most important factor in determining my mental health and ability to function.

|                   |          |       |                |
|-------------------|----------|-------|----------------|
| 1                 | 2        | 3     | 4              |
| Strongly Disagree | Disagree | Agree | Strongly Agree |

3. I am confident that I can take actions that will help prevent or minimize some symptoms or problems associated with my mental health condition.

|                   |          |       |                |
|-------------------|----------|-------|----------------|
| 1                 | 2        | 3     | 4              |
| Strongly Disagree | Disagree | Agree | Strongly Agree |

4. I know what each of my prescribed mental health medications does.

|                   |          |       |                |
|-------------------|----------|-------|----------------|
| 1                 | 2        | 3     | 4              |
| Strongly Disagree | Disagree | Agree | Strongly Agree |

5. I am confident that I can tell when I need to go get mental health care, and when I can handle a mental health problem myself.

|                   |          |       |                |
|-------------------|----------|-------|----------------|
| 1                 | 2        | 3     | 4              |
| Strongly Disagree | Disagree | Agree | Strongly Agree |

6. I am confident I can tell my mental health clinician about concerns I have, even when he or she does not ask.

|                   |          |       |                |
|-------------------|----------|-------|----------------|
| 1                 | 2        | 3     | 4              |
| Strongly Disagree | Disagree | Agree | Strongly Agree |

1  
2  
3  
4  
5 **7. I am confident that I can follow through on mental health treatments I need to do at home.**

6  
7                   1                                   2                                   3                                   4  
8  
9 Strongly Disagree                   Disagree                   Agree                   Strongly Agree

10  
11  
12 **8. I understand the nature and causes of my mental health condition(s).**

13  
14                   1                                   2                                   3                                   4  
15  
16 Strongly Disagree                   Disagree                   Agree                   Strongly Agree

17  
18  
19  
20 **9. I know the different treatment options available for my mental health condition(s).**

21  
22                   1                                   2                                   3                                   4  
23  
24 Strongly Disagree                   Disagree                   Agree                   Strongly Agree

25  
26  
27  
28 **10. I am able to maintain the lifestyle changes I have made for my mental health.**

29  
30                   1                                   2                                   3                                   4  
31  
32 Strongly Disagree                   Disagree                   Agree                   Strongly Agree

33  
34  
35 **11. I know how to prevent further mental health problems.**

36  
37                   1                                   2                                   3                                   4  
38  
39 Strongly Disagree                   Disagree                   Agree                   Strongly Agree

40  
41  
42  
43 **12. I am confident I can figure out solutions when new situations or problems arise with my mental health.**

44  
45                   1                                   2                                   3                                   4  
46  
47 Strongly Disagree                   Disagree                   Agree                   Strongly Agree

48  
49  
50  
51 **13. I am confident that I can maintain lifestyle changes, like diet and exercise, even during times of stress.**

52  
53                   1                                   2                                   3                                   4  
54  
55 Strongly Disagree                   Disagree                   Agree                   Strongly Agree



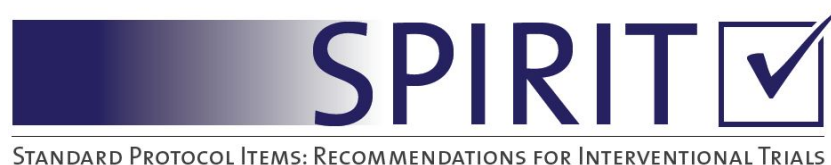

SPIRIT 2013 Checklist: Recommended items to address in a clinical trial protocol and related documents\*

| Section/item                      | Item No | Description                                                                                                                                                                                                                                                                              | Addressed on page number              |
|-----------------------------------|---------|------------------------------------------------------------------------------------------------------------------------------------------------------------------------------------------------------------------------------------------------------------------------------------------|---------------------------------------|
| <b>Administrative information</b> |         |                                                                                                                                                                                                                                                                                          |                                       |
| Title                             | 1       | Descriptive title identifying the study design, population, interventions, and, if applicable, trial acronym                                                                                                                                                                             | <u>Page 1 Line 1</u>                  |
| Trial registration                | 2a      | Trial identifier and registry name. If not yet registered, name of intended registry                                                                                                                                                                                                     | <u>Page 4 Line 64</u>                 |
|                                   | 2b      | All items from the World Health Organization Trial Registration Data Set                                                                                                                                                                                                                 | Provided on <u>ClinicalTrials.gov</u> |
| Protocol version                  | 3       | Date and version identifier                                                                                                                                                                                                                                                              | <u>Page 1 of protocol</u>             |
| Funding                           | 4       | Sources and types of financial, material, and other support                                                                                                                                                                                                                              | <u>Page 20 Line 396</u>               |
| Roles and responsibilities        | 5a      | Names, affiliations, and roles of protocol contributors                                                                                                                                                                                                                                  | <u>Page 21 Line 408</u>               |
|                                   | 5b      | Name and contact information for the trial sponsor                                                                                                                                                                                                                                       | <u>Page 1 Line 22</u>                 |
|                                   | 5c      | Role of study sponsor and funders, if any, in study design; collection, management, analysis, and interpretation of data; writing of the report; and the decision to submit the report for publication, including whether they will have ultimate authority over any of these activities | <u>Page 21 Line 407</u>               |
|                                   | 5d      | Composition, roles, and responsibilities of the coordinating centre, steering committee, endpoint adjudication committee, data management team, and other individuals or groups overseeing the trial, if applicable (see Item 21a for data monitoring committee)                         | <u>Page 21 Line 407</u>               |

1 **Introduction**

2

3 Background and rationale 6a Description of research question and justification for undertaking the trial, including summary of relevant studies (published and unpublished) examining benefits and harms for each intervention [Page 7 Line 137](#)

4

5

6 6b Explanation for choice of comparators [N/A](#)

7

8 Objectives 7 Specific objectives or hypotheses [Page 9 Line 163](#)

9

10 Trial design 8 Description of trial design including type of trial (eg, parallel group, crossover, factorial, single group), allocation ratio, and framework (eg, superiority, equivalence, noninferiority, exploratory) [Page 9 Line 170](#)

11

12

13

14 **Methods: Participants, interventions, and outcomes**

15

16 Study setting 9 Description of study settings (eg, community clinic, academic hospital) and list of countries where data will be collected. Reference to where list of study sites can be obtained [Page 9 Line 176](#)

17

18

19 Eligibility criteria 10 Inclusion and exclusion criteria for participants. If applicable, eligibility criteria for study centres and individuals who will perform the interventions (eg, surgeons, psychotherapists) [Page 10 Line 188](#)

20

21

22 Interventions 11a Interventions for each group with sufficient detail to allow replication, including how and when they will be administered [Page 11 Line 190](#)

23

24

25 11b Criteria for discontinuing or modifying allocated interventions for a given trial participant (eg, drug dose change in response to harms, participant request, or improving/worsening disease) [Page 18 Line 343](#)

26

27

28 11c Strategies to improve adherence to intervention protocols, and any procedures for monitoring adherence (eg, drug tablet return, laboratory tests) [Page 19 Line 358](#)

29

30

31 11d Relevant concomitant care and interventions that are permitted or prohibited during the trial [As listed on each drug label](#)

32

33

34

35 Outcomes 12 Primary, secondary, and other outcomes, including the specific measurement variable (eg, systolic blood pressure), analysis metric (eg, change from baseline, final value, time to event), method of aggregation (eg, median, proportion), and time point for each outcome. Explanation of the clinical relevance of chosen efficacy and harm outcomes is strongly recommended [Page 14 Line 265](#)

36

37

38

39

40

41

42

43

44

45

46

|   |                      |    |                                                                                                                                                                                       |                         |
|---|----------------------|----|---------------------------------------------------------------------------------------------------------------------------------------------------------------------------------------|-------------------------|
| 1 | Participant timeline | 13 | Time schedule of enrolment, interventions (including any run-ins and washouts), assessments, and visits for participants. A schematic diagram is highly recommended (see Figure)      | <u>Figure 3</u>         |
| 2 |                      |    |                                                                                                                                                                                       |                         |
| 3 |                      |    |                                                                                                                                                                                       |                         |
| 4 | Sample size          | 14 | Estimated number of participants needed to achieve study objectives and how it was determined, including clinical and statistical assumptions supporting any sample size calculations | <u>Page 15 Line 282</u> |
| 5 |                      |    |                                                                                                                                                                                       |                         |
| 6 |                      |    |                                                                                                                                                                                       |                         |
| 7 | Recruitment          | 15 | Strategies for achieving adequate participant enrolment to reach target sample size                                                                                                   | <u>Page 13 Line 249</u> |
| 8 |                      |    |                                                                                                                                                                                       |                         |

9  
10 **Methods: Assignment of interventions (for controlled trials)**

11 Allocation:

|    |                                  |     |                                                                                                                                                                                                                                                                                                                                                          |            |
|----|----------------------------------|-----|----------------------------------------------------------------------------------------------------------------------------------------------------------------------------------------------------------------------------------------------------------------------------------------------------------------------------------------------------------|------------|
| 12 |                                  |     |                                                                                                                                                                                                                                                                                                                                                          |            |
| 13 |                                  |     |                                                                                                                                                                                                                                                                                                                                                          |            |
| 14 | Sequence generation              | 16a | Method of generating the allocation sequence (eg, computer-generated random numbers), and list of any factors for stratification. To reduce predictability of a random sequence, details of any planned restriction (eg, blocking) should be provided in a separate document that is unavailable to those who enrol participants or assign interventions | <u>N/A</u> |
| 15 |                                  |     |                                                                                                                                                                                                                                                                                                                                                          |            |
| 16 |                                  |     |                                                                                                                                                                                                                                                                                                                                                          |            |
| 17 |                                  |     |                                                                                                                                                                                                                                                                                                                                                          |            |
| 18 |                                  |     |                                                                                                                                                                                                                                                                                                                                                          |            |
| 19 | Allocation concealment mechanism | 16b | Mechanism of implementing the allocation sequence (eg, central telephone; sequentially numbered, opaque, sealed envelopes), describing any steps to conceal the sequence until interventions are assigned                                                                                                                                                | <u>N/A</u> |
| 20 |                                  |     |                                                                                                                                                                                                                                                                                                                                                          |            |
| 21 |                                  |     |                                                                                                                                                                                                                                                                                                                                                          |            |
| 22 |                                  |     |                                                                                                                                                                                                                                                                                                                                                          |            |
| 23 |                                  |     |                                                                                                                                                                                                                                                                                                                                                          |            |
| 24 | Implementation                   | 16c | Who will generate the allocation sequence, who will enrol participants, and who will assign participants to interventions                                                                                                                                                                                                                                | <u>N/A</u> |
| 25 |                                  |     |                                                                                                                                                                                                                                                                                                                                                          |            |
| 26 |                                  |     |                                                                                                                                                                                                                                                                                                                                                          |            |
| 27 | Blinding (masking)               | 17a | Who will be blinded after assignment to interventions (eg, trial participants, care providers, outcome assessors, data analysts), and how                                                                                                                                                                                                                | <u>N/A</u> |
| 28 |                                  |     |                                                                                                                                                                                                                                                                                                                                                          |            |
| 29 |                                  |     |                                                                                                                                                                                                                                                                                                                                                          |            |
| 30 |                                  | 17b | If blinded, circumstances under which unblinding is permissible, and procedure for revealing a participant's allocated intervention during the trial                                                                                                                                                                                                     | <u>N/A</u> |
| 31 |                                  |     |                                                                                                                                                                                                                                                                                                                                                          |            |
| 32 |                                  |     |                                                                                                                                                                                                                                                                                                                                                          |            |
| 33 |                                  |     |                                                                                                                                                                                                                                                                                                                                                          |            |

34 **Methods: Data collection, management, and analysis**

|    |                         |     |                                                                                                                                                                                                                                                                                                                                                                                                              |                         |
|----|-------------------------|-----|--------------------------------------------------------------------------------------------------------------------------------------------------------------------------------------------------------------------------------------------------------------------------------------------------------------------------------------------------------------------------------------------------------------|-------------------------|
| 35 |                         |     |                                                                                                                                                                                                                                                                                                                                                                                                              |                         |
| 36 | Data collection methods | 18a | Plans for assessment and collection of outcome, baseline, and other trial data, including any related processes to promote data quality (eg, duplicate measurements, training of assessors) and a description of study instruments (eg, questionnaires, laboratory tests) along with their reliability and validity, if known. Reference to where data collection forms can be found, if not in the protocol | <u>Protocol Page 81</u> |
| 37 |                         |     |                                                                                                                                                                                                                                                                                                                                                                                                              |                         |
| 38 |                         |     |                                                                                                                                                                                                                                                                                                                                                                                                              |                         |
| 39 |                         |     |                                                                                                                                                                                                                                                                                                                                                                                                              |                         |
| 40 |                         |     |                                                                                                                                                                                                                                                                                                                                                                                                              |                         |
| 41 |                         |     |                                                                                                                                                                                                                                                                                                                                                                                                              |                         |
| 42 |                         |     |                                                                                                                                                                                                                                                                                                                                                                                                              |                         |

|    |                                 |     |                                                                                                                                                                                                                                                                                                                                       |                                                                     |
|----|---------------------------------|-----|---------------------------------------------------------------------------------------------------------------------------------------------------------------------------------------------------------------------------------------------------------------------------------------------------------------------------------------|---------------------------------------------------------------------|
| 1  |                                 | 18b | Plans to promote participant retention and complete follow-up, including list of any outcome data to be collected for participants who discontinue or deviate from intervention protocols                                                                                                                                             | <u>Page 14 Line 259</u>                                             |
| 2  |                                 |     |                                                                                                                                                                                                                                                                                                                                       |                                                                     |
| 3  |                                 |     |                                                                                                                                                                                                                                                                                                                                       |                                                                     |
| 4  | Data management                 | 19  | Plans for data entry, coding, security, and storage, including any related processes to promote data quality (eg, double data entry; range checks for data values). Reference to where details of data management procedures can be found, if not in the protocol                                                                     | <u>Protocol Page 73</u>                                             |
| 5  |                                 |     |                                                                                                                                                                                                                                                                                                                                       |                                                                     |
| 6  |                                 |     |                                                                                                                                                                                                                                                                                                                                       |                                                                     |
| 7  |                                 |     |                                                                                                                                                                                                                                                                                                                                       |                                                                     |
| 8  | Statistical methods             | 20a | Statistical methods for analysing primary and secondary outcomes. Reference to where other details of the statistical analysis plan can be found, if not in the protocol                                                                                                                                                              | <u>Protocol Page 73</u>                                             |
| 9  |                                 |     |                                                                                                                                                                                                                                                                                                                                       |                                                                     |
| 10 |                                 |     |                                                                                                                                                                                                                                                                                                                                       |                                                                     |
| 11 |                                 | 20b | Methods for any additional analyses (eg, subgroup and adjusted analyses)                                                                                                                                                                                                                                                              | <u>Page 15 Line 282</u>                                             |
| 12 |                                 |     |                                                                                                                                                                                                                                                                                                                                       |                                                                     |
| 13 |                                 | 20c | Definition of analysis population relating to protocol non-adherence (eg, as randomised analysis), and any statistical methods to handle missing data (eg, multiple imputation)                                                                                                                                                       | <u>Page 15 Line 282</u>                                             |
| 14 |                                 |     |                                                                                                                                                                                                                                                                                                                                       |                                                                     |
| 15 |                                 |     |                                                                                                                                                                                                                                                                                                                                       |                                                                     |
| 16 |                                 |     |                                                                                                                                                                                                                                                                                                                                       |                                                                     |
| 17 | <b>Methods: Monitoring</b>      |     |                                                                                                                                                                                                                                                                                                                                       |                                                                     |
| 18 |                                 |     |                                                                                                                                                                                                                                                                                                                                       |                                                                     |
| 19 | Data monitoring                 | 21a | Composition of data monitoring committee (DMC); summary of its role and reporting structure; statement of whether it is independent from the sponsor and competing interests; and reference to where further details about its charter can be found, if not in the protocol. Alternatively, an explanation of why a DMC is not needed | <u>N/A Pragmatic Trial - Safety of Interventions is Established</u> |
| 20 |                                 |     |                                                                                                                                                                                                                                                                                                                                       |                                                                     |
| 21 |                                 |     |                                                                                                                                                                                                                                                                                                                                       |                                                                     |
| 22 |                                 |     |                                                                                                                                                                                                                                                                                                                                       |                                                                     |
| 23 |                                 |     |                                                                                                                                                                                                                                                                                                                                       |                                                                     |
| 24 |                                 |     |                                                                                                                                                                                                                                                                                                                                       |                                                                     |
| 25 |                                 | 21b | Description of any interim analyses and stopping guidelines, including who will have access to these interim results and make the final decision to terminate the trial                                                                                                                                                               | <u>N/A</u>                                                          |
| 26 |                                 |     |                                                                                                                                                                                                                                                                                                                                       |                                                                     |
| 27 |                                 |     |                                                                                                                                                                                                                                                                                                                                       |                                                                     |
| 28 | Harms                           | 22  | Plans for collecting, assessing, reporting, and managing solicited and spontaneously reported adverse events and other unintended effects of trial interventions or trial conduct                                                                                                                                                     | <u>Protocol Page 66</u>                                             |
| 29 |                                 |     |                                                                                                                                                                                                                                                                                                                                       |                                                                     |
| 30 |                                 |     |                                                                                                                                                                                                                                                                                                                                       |                                                                     |
| 31 | Auditing                        | 23  | Frequency and procedures for auditing trial conduct, if any, and whether the process will be independent from investigators and the sponsor                                                                                                                                                                                           | <u>Protocol Page 81</u>                                             |
| 32 |                                 |     |                                                                                                                                                                                                                                                                                                                                       |                                                                     |
| 33 |                                 |     |                                                                                                                                                                                                                                                                                                                                       |                                                                     |
| 34 |                                 |     |                                                                                                                                                                                                                                                                                                                                       |                                                                     |
| 35 | <b>Ethics and dissemination</b> |     |                                                                                                                                                                                                                                                                                                                                       |                                                                     |
| 36 |                                 |     |                                                                                                                                                                                                                                                                                                                                       |                                                                     |
| 37 | Research ethics approval        | 24  | Plans for seeking research ethics committee/institutional review board (REC/IRB) approval                                                                                                                                                                                                                                             | <u>Page 16 Line 309</u>                                             |
| 38 |                                 |     |                                                                                                                                                                                                                                                                                                                                       |                                                                     |
| 39 |                                 |     |                                                                                                                                                                                                                                                                                                                                       |                                                                     |
| 40 |                                 |     |                                                                                                                                                                                                                                                                                                                                       |                                                                     |
| 41 |                                 |     |                                                                                                                                                                                                                                                                                                                                       |                                                                     |
| 42 |                                 |     |                                                                                                                                                                                                                                                                                                                                       |                                                                     |
| 43 |                                 |     |                                                                                                                                                                                                                                                                                                                                       |                                                                     |
| 44 |                                 |     |                                                                                                                                                                                                                                                                                                                                       |                                                                     |
| 45 |                                 |     |                                                                                                                                                                                                                                                                                                                                       |                                                                     |
| 46 |                                 |     |                                                                                                                                                                                                                                                                                                                                       |                                                                     |

|    |                               |     |                                                                                                                                                                                                                                                                                     |                                                                        |
|----|-------------------------------|-----|-------------------------------------------------------------------------------------------------------------------------------------------------------------------------------------------------------------------------------------------------------------------------------------|------------------------------------------------------------------------|
| 1  | Protocol                      | 25  | Plans for communicating important protocol modifications (eg, changes to eligibility criteria, outcomes, analyses) to relevant parties (eg, investigators, REC/IRBs, trial participants, trial registries, journals, regulators)                                                    | Updates to <a href="https://ClinicalTrials.gov">ClinicalTrials.gov</a> |
| 2  | amendments                    |     |                                                                                                                                                                                                                                                                                     |                                                                        |
| 3  |                               |     |                                                                                                                                                                                                                                                                                     |                                                                        |
| 4  |                               |     |                                                                                                                                                                                                                                                                                     |                                                                        |
| 5  | Consent or assent             | 26a | Who will obtain informed consent or assent from potential trial participants or authorised surrogates, and how (see Item 32)                                                                                                                                                        | <a href="#">Page 15 Line 293</a>                                       |
| 6  |                               |     |                                                                                                                                                                                                                                                                                     |                                                                        |
| 7  |                               |     |                                                                                                                                                                                                                                                                                     |                                                                        |
| 8  |                               | 26b | Additional consent provisions for collection and use of participant data and biological specimens in ancillary studies, if applicable                                                                                                                                               | <a href="#">N/A</a>                                                    |
| 9  |                               |     |                                                                                                                                                                                                                                                                                     |                                                                        |
| 10 |                               |     |                                                                                                                                                                                                                                                                                     |                                                                        |
| 11 | Confidentiality               | 27  | How personal information about potential and enrolled participants will be collected, shared, and maintained in order to protect confidentiality before, during, and after the trial                                                                                                | <a href="#">Page 15 Line 299</a>                                       |
| 12 |                               |     |                                                                                                                                                                                                                                                                                     |                                                                        |
| 13 |                               |     |                                                                                                                                                                                                                                                                                     |                                                                        |
| 14 | Declaration of interests      | 28  | Financial and other competing interests for principal investigators for the overall trial and each study site                                                                                                                                                                       | <a href="#">Page 21 Line 402</a>                                       |
| 15 |                               |     |                                                                                                                                                                                                                                                                                     |                                                                        |
| 16 |                               |     |                                                                                                                                                                                                                                                                                     |                                                                        |
| 17 |                               |     |                                                                                                                                                                                                                                                                                     |                                                                        |
| 18 | Access to data                | 29  | Statement of who will have access to the final trial dataset, and disclosure of contractual agreements that limit such access for investigators                                                                                                                                     | <a href="#">Page 17 Line 318</a>                                       |
| 19 |                               |     |                                                                                                                                                                                                                                                                                     |                                                                        |
| 20 |                               |     |                                                                                                                                                                                                                                                                                     |                                                                        |
| 21 | Ancillary and post-trial care | 30  | Provisions, if any, for ancillary and post-trial care, and for compensation to those who suffer harm from trial participation                                                                                                                                                       | <a href="#">N/A</a>                                                    |
| 22 |                               |     |                                                                                                                                                                                                                                                                                     |                                                                        |
| 23 |                               |     |                                                                                                                                                                                                                                                                                     |                                                                        |
| 24 | Dissemination policy          | 31a | Plans for investigators and sponsor to communicate trial results to participants, healthcare professionals, the public, and other relevant groups (eg, via publication, reporting in results databases, or other data sharing arrangements), including any publication restrictions | <a href="#">Protocol page 84</a>                                       |
| 25 |                               |     |                                                                                                                                                                                                                                                                                     |                                                                        |
| 26 |                               |     |                                                                                                                                                                                                                                                                                     |                                                                        |
| 27 |                               |     |                                                                                                                                                                                                                                                                                     |                                                                        |
| 28 |                               |     |                                                                                                                                                                                                                                                                                     |                                                                        |
| 29 |                               | 31b | Authorship eligibility guidelines and any intended use of professional writers                                                                                                                                                                                                      | <a href="#">Protocol page 84</a>                                       |
| 30 |                               |     |                                                                                                                                                                                                                                                                                     |                                                                        |
| 31 |                               | 31c | Plans, if any, for granting public access to the full protocol, participant-level dataset, and statistical code                                                                                                                                                                     | <a href="#">Not yet determined</a>                                     |
| 32 |                               |     |                                                                                                                                                                                                                                                                                     |                                                                        |
| 33 | <b>Appendices</b>             |     |                                                                                                                                                                                                                                                                                     |                                                                        |
| 34 |                               |     |                                                                                                                                                                                                                                                                                     |                                                                        |
| 35 | Informed consent materials    | 32  | Model consent form and other related documentation given to participants and authorised surrogates                                                                                                                                                                                  | <a href="#">Protocol Page 107</a>                                      |
| 36 |                               |     |                                                                                                                                                                                                                                                                                     |                                                                        |
| 37 |                               |     |                                                                                                                                                                                                                                                                                     |                                                                        |
| 38 | Biological specimens          | 33  | Plans for collection, laboratory evaluation, and storage of biological specimens for genetic or molecular analysis in the current trial and for future use in ancillary studies, if applicable                                                                                      | <a href="#">N/A</a>                                                    |
| 39 |                               |     |                                                                                                                                                                                                                                                                                     |                                                                        |
| 40 |                               |     |                                                                                                                                                                                                                                                                                     |                                                                        |
| 41 |                               |     |                                                                                                                                                                                                                                                                                     |                                                                        |
| 42 |                               |     |                                                                                                                                                                                                                                                                                     |                                                                        |
| 43 |                               |     |                                                                                                                                                                                                                                                                                     |                                                                        |
| 44 |                               |     |                                                                                                                                                                                                                                                                                     |                                                                        |
| 45 |                               |     |                                                                                                                                                                                                                                                                                     |                                                                        |
| 46 |                               |     |                                                                                                                                                                                                                                                                                     |                                                                        |

1 \*It is strongly recommended that this checklist be read in conjunction with the SPIRIT 2013 Explanation & Elaboration for important clarification on the items.  
2 Amendments to the protocol should be tracked and dated. The SPIRIT checklist is copyrighted by the SPIRIT Group under the Creative Commons  
3 [“Attribution-NonCommercial-NoDerivs 3.0 Unported”](#) license.  
4  
5  
6  
7  
8  
9  
10  
11  
12  
13  
14  
15  
16  
17  
18  
19  
20  
21  
22  
23  
24  
25  
26  
27  
28  
29  
30  
31  
32  
33  
34  
35  
36  
37  
38  
39  
40  
41  
42  
43  
44  
45  
46

For peer review only

# BMJ Open

## A Study Protocol for the Hummingbird Study, a Multicenter Exploratory Trial to Assess the Acceptance and Performance of a Digital Medicine System in Adults With Schizophrenia, Schizoaffective Disorder, or First-Episode Psychosis

|                                 |                                                                                                                                                                                                                                                                                                                                                                                                                                                                                                        |
|---------------------------------|--------------------------------------------------------------------------------------------------------------------------------------------------------------------------------------------------------------------------------------------------------------------------------------------------------------------------------------------------------------------------------------------------------------------------------------------------------------------------------------------------------|
| Journal:                        | <i>BMJ Open</i>                                                                                                                                                                                                                                                                                                                                                                                                                                                                                        |
| Manuscript ID                   | bmjopen-2018-025952.R2                                                                                                                                                                                                                                                                                                                                                                                                                                                                                 |
| Article Type:                   | Protocol                                                                                                                                                                                                                                                                                                                                                                                                                                                                                               |
| Date Submitted by the Author:   | 10-May-2019                                                                                                                                                                                                                                                                                                                                                                                                                                                                                            |
| Complete List of Authors:       | Fowler, J.; Otsuka Pharmaceutical Development & Commercialization, Inc.,<br>Cope, Nathan; Otsuka Pharmaceutical Europe Ltd.<br>Knights, Jonathan; Otsuka Pharmaceutical Development & Commercialization, Inc.<br>Phiri, Peter; Southern Health NHS Foundation Trust<br>Makin, Andrew; Otsuka Europe Development and Commercialisation Ltd.<br>Peters-Strickland, Tim; Otsuka Pharmaceutical Development & Commercialization, Inc.<br>Rathod, Shanaya; Southern Health NHS Foundation Trust, Psychiatry |
| <b>Primary Subject Heading</b>: | Mental health                                                                                                                                                                                                                                                                                                                                                                                                                                                                                          |
| Secondary Subject Heading:      | Evidence based practice                                                                                                                                                                                                                                                                                                                                                                                                                                                                                |
| Keywords:                       | Coproduction, digital medicine, schizoaffective disorder, schizophrenia                                                                                                                                                                                                                                                                                                                                                                                                                                |
|                                 |                                                                                                                                                                                                                                                                                                                                                                                                                                                                                                        |

SCHOLARONE™  
Manuscripts

Study Protocol for DMS use for schizophrenia in the UK  
Revised to address Peer-review

1  
2  
3  
4 1 **A Study Protocol for the Hummingbird Study, a Multicenter Exploratory**  
5  
6 2 **Trial to Assess the Acceptance and Performance of a Digital Medicine System**  
7  
8  
9 3 **in Adults With Schizophrenia, Schizoaffective Disorder, or First-Episode**  
10  
11 4 **Psychosis**  
12  
13  
14  
15  
16  
17  
18  
19  
20  
21  
22  
23  
24  
25  
26  
27  
28

29 6 Running title: Study protocol for DMS use in schizophrenia in the UK  
30  
31  
32  
33  
34  
35

36 8 Authors:

37 9 J. Corey Fowler, PhD,<sup>1</sup> Nathan Cope, PhD,<sup>2</sup> Jonathan Knights, PhD,<sup>1</sup> Peter Phiri, PhD,<sup>3</sup> Andrew  
38 10 Makin, MD,<sup>4</sup> Tim Peters-Strickland, MD,<sup>1</sup> Shanaya Rathod, DM, MRCPsych<sup>3</sup>  
39  
40  
41  
42  
43

44 12 Affiliations:

45 13 <sup>1</sup>Otsuka Pharmaceutical Development & Commercialization, Inc., Princeton, NJ, USA; <sup>2</sup>Otsuka  
46 14 Pharmaceutical Europe Ltd., Wexham, UK; <sup>3</sup>Southern Health NHS Foundation Trust,  
47 15 Southampton, UK; <sup>4</sup>Otsuka Europe Development and Commercialisation Ltd., Wexham, UK  
48  
49  
50  
51  
52  
53  
54  
55  
56  
57  
58  
59  
60

61 17 E-mail addresses:

62 18 [corey.fowler@otsuka-us.com](mailto:corey.fowler@otsuka-us.com), [NCope@otsuka-europe.com](mailto:NCope@otsuka-europe.com), [Jonathan.Knights@otsuka-us.com](mailto:Jonathan.Knights@otsuka-us.com),  
63 19 [Peter.Phiri@southernhealth.nhs.uk](mailto:Peter.Phiri@southernhealth.nhs.uk), [AMakin@otsuka-europe.com](mailto:AMakin@otsuka-europe.com), [tim.peters-strickland@otsuka-  
65 21 us.com](mailto:tim.peters-strickland@otsuka-<br/>64 20 us.com), [shanayarathod@nhs.net](mailto:shanayarathod@nhs.net)

66 22 Address correspondence to: J. Corey Fowler, PhD

67 23 [corey.fowler@otsuka-us.com](mailto:corey.fowler@otsuka-us.com)

68 24 Associate Director, Global Clinical Development

69 25 Otsuka Pharmaceutical Development & Commercialization, Inc.

70 26 508 Carnegie Center Blvd, Suite 300

71 27 Princeton, NJ 08540, USA

72 28 +1 919 475 4823



Study Protocol for DMS use for schizophrenia in the UK  
Revised to address Peer-review

1  
2  
3 29  
4  
5 30 Word count (max 4000 for BMJ Open): 3988 (Intro through conclusion, not including table)  
6  
7 31 Table count: 1  
8  
9 32 Figure count: 3 (+6 supplemental)  
10  
11 33 Reference count: 31  
12  
13 34  
14  
15 35  
16  
17  
18  
19  
20  
21  
22  
23  
24  
25  
26  
27  
28  
29  
30  
31  
32  
33  
34  
35  
36  
37  
38  
39  
40  
41  
42  
43  
44  
45  
46  
47  
48  
49  
50  
51  
52  
53  
54  
55  
56  
57  
58  
59  
60

Study Protocol for DMS use for schizophrenia in the UK  
Revised to address Peer-review

## 36 **ABSTRACT**

37 Objectives: In patients with schizophrenia, medication adherence is important for relapse  
38 prevention, and effective adherence monitoring is essential for treatment planning. A digital  
39 medicine system (DMS) has been developed to objectively monitor patient adherence and  
40 support clinical decision-making regarding treatment choices. This study's objective is to assess  
41 the acceptance and performance of the DMS in adults with schizophrenia, schizoaffective  
42 disorder, or first-episode psychosis and in healthcare professionals (HCPs) in the United  
43 Kingdom.

44 Design: This is a multicenter, 8-week, single-arm, open-label pragmatic trial designed using  
45 coproduction methodology.

46 Setting: The study will be conducted at 5 National Health Service Foundation Trusts in the  
47 United Kingdom.

48 Participants: Patients 18 to 65 years old with a diagnosis of schizophrenia, schizoaffective  
49 disorder, or first-episode psychosis will be eligible. HCPs (psychiatrists, care coordinators,  
50 nurses, pharmacists) researchers, information governance (IG) personnel, Clinical  
51 Commissioning Groups (CCGs), and patients participated in study design and coproduction.

52 Interventions: The DMS is an integrated system comprising an oral sensor tablet co-encapsulated  
53 with an antipsychotic, nonmedicated wearable patch, mobile application (app), and Web-based  
54 dashboard. The co-encapsulation product contains aripiprazole, olanzapine, quetiapine, or  
55 risperidone, as prescribed by the HCP, with a miniature ingestible event marker (IEM) in tablet.  
56 Upon ingestion, the IEM transmits a signal to the patch, which collects ingestion and physical  
57 activity data for processing on the patient's smartphone or tablet before transmission to a cloud-  
58 based server for viewing by patients, caregivers, and HCPs on secure web portals or mobile apps.

Study Protocol for DMS use for schizophrenia in the UK  
Revised to address Peer-review

59 Outcome measures: The primary and secondary endpoints will be the proportion of days with  
60 good patch coverage and ingestion adherence, respectively.

61 Conclusions: This study will provide data on the acceptance and performance of the DMS in UK  
62 patients with schizophrenia, schizoaffective disorder, or first-episode psychosis and in caregivers  
63 and HCPs.

64 ClinicalTrials.gov: NCT03568500; EudraCT 2017-004602-17

## 65 **Keywords**

66 Coproduction, digital medicine, schizoaffective disorder, schizophrenia

## 67 **STRENGTHS AND LIMITATIONS OF THIS STUDY**

- 68 • Although a PRECIS-2 assessment tool was not used during the design of the study the  
69 authors feel that based on a retrospective PRECIS-2 analysis (refer to supplemental  
70 materials for this analysis) this study does meet the criteria for a pragmatic study.
- 71 • This study was codeveloped with input from clinical practitioners, researchers, patients,  
72 caregivers, service managers, IG teams, and clinical commissioning groups to obtain  
73 information that will best serve all those involved in the treatment and care of patients  
74 with schizophrenia, schizoaffective disorder, and first-episode psychosis.
- 75 • The digital medicine system (DMS) uses an integrated, user-friendly system to provide  
76 objective feedback on patient medication adherence and physical health parameters, such  
77 as activity and rest levels, as well as voluntary subjective entries regarding mood and rest  
78 quality, to help support treatment decisions and evaluation.

Study Protocol for DMS use for schizophrenia in the UK  
Revised to address Peer-review

- 1  
2  
3 79      • Information from the DMS is made readily available to patients, caregivers (with the  
4  
5 patient's consent), and physicians to support clinical decision making, proactive  
6 80  
7 intervention, and individualized care in near to real time.  
8 81  
9  
10 82      • Possible limitations of this study are the small sample size (N=60), limited  
11  
12 generalizability to the broader pool of UK mental health patients and providers, and the  
13 83  
14 relatively short 12-week timeframe. Although the DMS does require the patient to  
15 84  
16 engage more with their own care, the benefits of increasing their awareness of  
17 85  
18 medication, activity, rest, and mood patterns may outweigh risks/burden for most  
19 86  
20 patients. The DMS was not developed for all mental health patients, but for a subset of  
21 87  
22 patients who realize they have difficulty with adherence and want to improve their status  
23 88  
24 by self-monitoring with potential for their HCP's to make better clinical decisions based  
25 89  
26 on objective data from the DMS. Patients with poor insight into their illness will likely be  
27 90  
28 a better candidate for a long-acting injectable atypical antipsychotic than this DMS.  
29 91  
30  
31  
32  
33  
34  
35 92  
36  
37  
38  
39  
40  
41  
42  
43  
44  
45  
46  
47  
48  
49  
50  
51  
52  
53  
54  
55  
56  
57  
58  
59  
60

Study Protocol for DMS use for schizophrenia in the UK  
Revised to address Peer-review

## 93 INTRODUCTION

94 Schizophrenia has an enormous social and economic burden worldwide, accounting for 1.1% of  
95 total disability-adjusted life-years and 2.7% of years lived with disability [1, 2]. In Europe, the  
96 economic impact of schizophrenia and other psychotic disorders and syndromes in 2010 was  
97 estimated at €93.9 billion [3]. Because schizophrenia is a chronic disease, maintenance treatment  
98 is often necessary to prevent relapse and preserve quality of life over the long term [4, 5].

99 Although antipsychotic medications are effective [6-8], poor insight into schizophrenia can  
100 increase risk of medication nonadherence [9, 10]. In patients with schizophrenia, the rate of  
101 nonadherence to prescribed antipsychotics has been reported to be as high as 74% [11]. Not only  
102 is medication nonadherence burdensome to patients and their families, it also increases the  
103 likelihood of rehospitalization and relapse [12] and contributes substantially to healthcare costs  
104 [13]. In 2005/2006, mean annual psychiatric inpatient and medication costs for patients with  
105 schizophrenia in England were estimated to be approximately £3,000 and £2,000 per patient,  
106 respectively [14].

107 Because medication adherence is important to relapse prevention in schizophrenia [15], effective  
108 adherence monitoring is an essential part of the treatment plan. Although there are various  
109 subjective methods for determining medication adherence, including patient surveys, adherence  
110 diaries, and clinician ratings of patient symptoms and medication side effects, these methods  
111 have low validity [16]. Blister packs and electronic medication bottle caps can provide an  
112 indicator of pill removal or bottle opening and have been shown to improve adherence [17, 18],  
113 but neither technology provides an objective marker of pill ingestion or supports remote  
114 monitoring by healthcare professionals (HCPs). Optimal adherence monitoring and support for

Study Protocol for DMS use for schizophrenia in the UK  
Revised to address Peer-review

1  
2  
3 115 patients with schizophrenia requires a system that provides physicians with objective information  
4  
5 116 during interim periods between patient visits.  
6  
7

8 117 The use of modern technology such as personal digital assistants [19], digital wristwatches [20],  
9  
10 118 handheld computers [21], and mobile phones [22] to help people with schizophrenia dealing with  
11  
12 119 their disease has shown success. A digital medicine system (DMS) has been developed as a drug-  
13  
14 120 device combination to objectively assess and report ingestion of prescription antipsychotics [23].  
15  
16

17 121 The DMS has 4 main components: an ingestible sensor embedded within an inert tablet, a  
18  
19 122 nonmedicated wearable sensor (patch) worn by the patient, a mobile application (app), and a  
20  
21 123 Web-based dashboard [23]. Upon interaction with stomach fluids, the ingestible sensor is  
22  
23 124 activated and communicates with the wearable sensor, which sends a signal to a Bluetooth-paired  
24  
25 125 mobile device where it can be viewed by patients or be subsequently viewed by HCPs and  
26  
27 126 caregivers using secure mobile- and cloud-based software [23]. The DMS also enables patients  
28  
29 127 to share data on their activity and rest levels as well as subjective data on mood and rest quality,  
30  
31 128 which can be generated while the patient is engaged with the system. The intention of the DMS  
32  
33 129 is to encourage greater patient self-management and behavior change while enabling caregivers  
34  
35 130 and HCPs to provide better care and support both within and outside of office visits, further  
36  
37 131 engaging patients in their ongoing disease management. The data is communicated to the  
38  
39 132 psychiatrist that is connected to the patient on the MyCite platform. Additionally, should the  
40  
41 133 patient choose to share their data, they are able to invite additional healthcare providers,  
42  
43 134 caregivers and/or family or friends. Recipients of the data, through a web-based password  
44  
45 135 protected platform, are able to view this data and assist the patient with their treatment plan,  
46  
47 136 however HCPs can only access the portal for a specific patient once he/she has consented to give  
48  
49 137 them access to their information in the system. It is envisioned that HCPs will be able to use this  
50  
51  
52  
53  
54  
55  
56  
57  
58  
59  
60

Study Protocol for DMS use for schizophrenia in the UK  
Revised to address Peer-review

138 data to make more informed clinical decisions such as whether individuals need dose adjustment,  
139 medication changes or conversations on lifestyle, adherence or other parameters.

140 Previous results in the USA have shown in an open-label, 8-week study, 78% (47/60) of patients  
141 and 72% (43/60) of HCPs reported being somewhat satisfied, satisfied, or extremely satisfied  
142 with the DMS [24]. Findings from another open-label study showed patients to be actively  
143 involved in their treatment, with 73.5% (36/49) utilizing call centers for technological DMS  
144 support [25]; the rate of ingestion adherence in this study for the 15 patients with schizophrenia  
145 was 85.6% [25].

146 The DMS from the current study (namely the ingestible sensor and the wearable sensor) are  
147 Conformité Européene (CE)–marked for use in Europe as class IIa medical devices (CE 559373),  
148 but studies in European mental health populations have not been performed. Therefore, the  
149 objective of this exploratory study is to assess the acceptance and performance of the DMS  
150 among adult patients with schizophrenia, schizoaffective disorder, or first-episode psychosis and  
151 among HCPs from different care settings in the United Kingdom. We are particularly interested  
152 in assessing the acceptance of the digital medicine technology in individuals from different care  
153 settings. Acceptance will be assessed by study completion and, feedback from subjects from  
154 patient satisfaction surveys. Furthermore, acceptance will also be evaluated by healthcare  
155 providers using the system; this will be assessed by how their clinical decisions altered whilst  
156 using the system and through HCP Utility questionnaire evaluations.

157 In respect to performance, the study will be assessing multiple hardware and software from a  
158 varied population. Based on operational feedback of different phones and OS and any technical  
159 troubleshooting that occurs, the study will be able to determine areas of the app that need to be  
160 enhanced to ensure that the app functions across multiple hardware and operating systems.

Study Protocol for DMS use for schizophrenia in the UK  
Revised to address Peer-review

1  
2  
3 161 Previous studies performed using the DMS were conducted in relatively stable individuals with  
4  
5 162 schizophrenia. For this study, we have broadened the inclusion criteria and will be assessing the  
6  
7 163 technology in a range of clinical groups from different care settings, such as those individuals  
8  
9 164 managed in the community or on specialized services such as Early Intervention in Psychosis  
10  
11 165 services to determine the performance in these different environments.  
12  
13

14  
15 166 The study is not intended to measure and report or make any claims of adherence, but instead, to  
16  
17 167 report the observed ingestions recorded by the DMS. Our goal is to look at the impact of  
18  
19 168 patients' improvements as a result of participation (e.g. reduced need for follow-up care,  
20  
21 169 knowledge of adherence to medication to help physicians decide whether patients are medication  
22  
23 170 compliant or require a long acting injectable or other follow-up care) with the hypothesis that  
24  
25 171 DMS will reduce overall healthcare utilization burden by optimizing treatment decisions.  
26  
27  
28  
29  
30

## 31 172 **METHODS AND ANALYSIS**

### 32 33 34 35 173 **Study design**

36  
37 174 This is a multicenter, 8-week, single-arm, open-label trial to evaluate the acceptance and  
38  
39 175 performance of the DMS in adult patients with schizophrenia, schizoaffective disorder, or first-  
40  
41 176 episode psychosis on an oral atypical antipsychotic medication (aripiprazole, olanzapine,  
42  
43 177 quetiapine, or risperidone) and in HCPs. Recruitment began the same day that we submitted to  
44  
45 178 CT.gov, 25/MAY. However, we didn't consent our first patient until 11/JUN and dosing  
46  
47 179 occurred on 18/JUN. The study will take place at 5 institutions in the United Kingdom:  
48  
49 180 Northumberland, Tyne and Wear National Health Service (NHS) Foundation Trust, Surrey and  
50  
51 181 Borders Partnership NHS Foundation Trust, Oxford Health NHS Foundation Trust, South  
52  
53 182 London and Maudsley NHS Foundation Trust, and Southern Health NHS Foundation Trust. The  
54  
55  
56  
57  
58  
59  
60



Study Protocol for DMS use for schizophrenia in the UK  
Revised to address Peer-review

183 first patient's first visit occurred in May 2018. Patient recruitment will be targeted to last  
184 approximately 4 months.

## 185 **Patient selection**

186 Patients for this exploratory study will be identified using database searches conducted at each  
187 study site per HCP discretion. Inclusion and exclusion criteria are provided in **Table 1**. The  
188 degree of clinical stability will be varied across participants that enroll. In short, a fully stable  
189 patient population will not be actively recruited, instead a range of clinical populations (crudely  
190 based on Clinical Global Impression – Severity scale (CGI-S)) from different care settings will  
191 participate.

192 **Table 1. Inclusion and Exclusion Criteria**

| <b>Inclusion criteria</b>                                                                                                                                                                                                                                                                                                                                                                                                                                                                                                                                                                                                                                                                                                                                                                                                                                                                                                                                                                                                                                                                                                                                                                                                                                                                                                                                                                                                                                                                                                                                                                                                                                                                                                                                                                                                                                                    |
|------------------------------------------------------------------------------------------------------------------------------------------------------------------------------------------------------------------------------------------------------------------------------------------------------------------------------------------------------------------------------------------------------------------------------------------------------------------------------------------------------------------------------------------------------------------------------------------------------------------------------------------------------------------------------------------------------------------------------------------------------------------------------------------------------------------------------------------------------------------------------------------------------------------------------------------------------------------------------------------------------------------------------------------------------------------------------------------------------------------------------------------------------------------------------------------------------------------------------------------------------------------------------------------------------------------------------------------------------------------------------------------------------------------------------------------------------------------------------------------------------------------------------------------------------------------------------------------------------------------------------------------------------------------------------------------------------------------------------------------------------------------------------------------------------------------------------------------------------------------------------|
| <ul style="list-style-type: none"> <li>• Willing and able to give written informed consent and adhere to trial procedures</li> <li>• Able to read and understand English</li> <li>• Age 18–65 years at the time of informed consent</li> <li>• Possessing a smartphone and able to use it to interact with the digital medicine system (DMS) application <b>through robust and dependable cellular or wireless internet connections (Subjects should have WiFi at home and/or at work, or at the very least have access to free WiFi hot spots. Alternatively, subjects should have a sufficient data plan from their mobile provider and/or coverage on their phone. Such assessments are made during the screening of potential subjects.)</b></li> <li>• Cooperative, able to ingest oral medication, willing to complete aspects of the trial, and capable of reporting adverse events (AEs)</li> <li>• Clinical diagnosis of schizophrenia, schizoaffective disorder (defined by International Classification of Diseases, Tenth Revision, codes F20 and F25), or first-episode psychosis based on case note review</li> <li>• Prescription for aripiprazole, olanzapine, quetiapine, or risperidone</li> <li>• Fulfills <math>\geq 1</math> of the following: <ul style="list-style-type: none"> <li>○ Discharge from a hospital admission (within 7 days of discharge) to an acute intervention team</li> <li>○ Referral to an acute intervention team before hospital admission</li> <li>○ Referral from an acute intervention team to a community team</li> <li>○ Managed by community services</li> <li>○ Inclusion within early intervention caseload (&lt;3 years from initial symptoms)</li> <li>○ Healthcare professional (HCP) determines the patient would benefit</li> </ul> </li> <li>• General medical condition does not pose additional risk</li> </ul> |

Study Protocol for DMS use for schizophrenia in the UK  
Revised to address Peer-review

- Skin on the anterior chest above the lower edge of the rib cage is free of any dermatologic problem

#### **Exclusion criteria**

- Any disorder that may affect patient's ability to participate in the trial or interact with a smartphone
- Likely to be incapable of using DMS technology, even with assistance
- History or evidence of a medical condition that would expose patient to undue risk of an AE
- Known allergy to adhesive tape or any component of the patch or co-encapsulation product
- Current incarceration in prison system
- Hospitalization at the time of screening due to mental or physical illness
- HCP recommendation to not participate
- Aversion to taking gelatin capsules
- Women who are breastfeeding, pregnant, or plan to become pregnant

193

#### **Intervention**

195 The DMS is an integrated, 4-component system comprising an oral co-encapsulation (CoE)  
196 pharmacologic sensor tablet, a Proteus® Patch, a mobile app, and Otsuka Medical dashboard  
197 software (**Figure 1**). Each CoE product contains an approved antipsychotic medication  
198 (aripiprazole, olanzapine, quetiapine, or risperidone) encapsulated with a miniature ingestible  
199 event marker (IEM) in tablet. HCPs will select the medication and dosage based on each  
200 patient's needs. Upon taking the medication, the IEM transmits a signal to the nonmedicated  
201 patch that is attached to the patient's skin. The patch collects IEM ingestion and physical activity  
202 data, which are then processed by the Patch Analytics Block on the patient's smartphone.  
203 Processed data are transferred through the app on the smartphone and sent to a cloud-based  
204 server for patient, caregiver, and HCP viewing on Otsuka Medical software through web portals  
205 or mobile apps. Patients will have access to the Otsuka Patient Application, caregivers will have

Study Protocol for DMS use for schizophrenia in the UK  
Revised to address Peer-review

206 access (with patient consent) to the Otsuka Caregiver Web Portal, and HCPs will have access to  
207 the Otsuka Healthcare Provider Web Portal.

208

## 209 **Patient and Public Involvement Statement**

### 210 **Coproduction**

211 This study was designed using coproduction methodology involving NHS staff and patients (**Figure 2**).  
212 Coproduction in this protocol is the involvement of people with lived experience of mental illness  
213 (diagnosed or otherwise) as equal partners alongside other healthcare stakeholders, in the design and  
214 contribution to the protocol. The lead site, Southern Health NHS Foundation Trust, held 5 coproduction  
215 workshops, and a subset of these workshops was repeated at other study sites to elicit feedback on the  
216 study design. At least 2 of these workshops involved patients. The discussions from the workshops  
217 addressed pharmacy items for the CoE product; HCP recruitment strategies; and protocols for  
218 identification, recruitment, and interactions with suitable patients and their general practitioners.  
219 Throughout the various workshops at the different sites, participants included clinicians, pharmacists,  
220 researchers, IG personnel (refers to the way in which the NHS handles, stores and processes information,  
221 in particular personal and sensitive information relating to patients and employees; it was vital to ensure  
222 that IG individuals were happy with the privacy and storage features of the digital medicine system),  
223 psychiatrists, care coordinators, nurses, information technology personnel, CCGs (clinically led groups  
224 within the NHS that are responsible for the planning and commissioning of healthcare services for their  
225 local area), and patients (**Figure 2**).

226

Study Protocol for DMS use for schizophrenia in the UK  
Revised to address Peer-review

## 227 **Patient Involvement**

228 The Patient and Public Involvement and Service User Lead from 2 study sites (Surrey and Borders  
229 Partnership NHS Foundation Trust and Northumberland, Tyne, and Wear NHS Foundation Trust)  
230 engaged service users to participate in a patient focus group. The objective of the focus groups was to  
231 obtain feedback on the app technology and assess the completion of specific app tasks. The groups  
232 identified issues that may have prevented the completion of key tasks and whether greater explanation  
233 would be needed, for instance in ensuring the app could send notifications to patients. Furthermore,  
234 general feedback on colour and language was also obtained.

235

## 236 **Procedures**

237 The study will comprise 3 phases: a screening phase of up to 7 days, an 8-week assessment  
238 phase, and a 2-week safety follow-up (**Figure 3**). Screening and baseline may occur at a single  
239 visit or at 2 visits separated by up to 7 days. At the screening/baseline visit, patients providing  
240 informed consent will receive patches, CoE product, and other supplies and undergo training by  
241 the HCPs on required and correct use of the DMS. HCPs will confirm proper patch application to  
242 the skin and pairing of the patch with the smartphone app when patients commence their usage  
243 of the digital medicine system, so called on boarding. These individuals will either be  
244 psychiatrists or research assistants for the site. During time in-between the only required site  
245 visits at weeks 4 and 8, patients will perform patch changing themselves and be guided, if  
246 required, through videos contained within the app. There is a freephone technical support line to  
247 assist individuals should they wish. Patients will be instructed to wear the patch continuously,  
248 replacing it every 7 days or as needed during the assessment period. An integrated call center  
249 will be available to patients for technical support regarding use of the DMS.

Study Protocol for DMS use for schizophrenia in the UK  
Revised to address Peer-review

250 During the subsequent 8-week assessment period, patients will visit their HCP at weeks 4 and 8  
251 (or at early termination) for clinical evaluation and review of DMS data. At the week 4 visit,  
252 patients will also obtain a prescription refill. HCPs will be required to monitor and review DMS  
253 data at least every 2 weeks, with the option of requesting additional patient visits as needed.  
254 HCPs will also have the ability to modify the patient's treatment plan at their discretion. Safety  
255 and tolerability will be assessed on an ongoing basis throughout the assessment period and  
256 during the subsequent 2-week safety follow-up, during which time a follow-up telephone call  
257 will be made to each study participant.

258 Healthcare utilization record evaluation will occur continuously beginning at the  
259 baseline/screening visit and will span a period ranging from 24 weeks before baseline/screening  
260 to 24 weeks after screening. All hospital admissions will be recorded and categorized as  
261 "planned," "unplanned," "related," or "unrelated" to psychiatric illness. Characteristics of each  
262 HCP encounter will also be recorded, including the nature of the contact; HCP role; whether the  
263 visit was planned or unplanned; whether or not the contact was initiated as a result of the DMS;  
264 and any medication titration, adherence counseling, education, or lifestyle coaching that  
265 occurred.

## 266 **Outcomes**

267 The primary endpoint is the proportion of days with good patch coverage during the assessment  
268 period, which will be defined as having  $\geq 80\%$  patch data available or IEMs detected within each  
269 day of the assessment period. The secondary endpoint is ingestion adherence, defined as the  
270 proportion of detected IEMs to the total expected IEMs ingested on the assessment days that  
271 showed good patch coverage.

Study Protocol for DMS use for schizophrenia in the UK  
Revised to address Peer-review

272 The following exploratory endpoints will also be included:

- 273 • The proportion of time during the assessment period that patients wear their patch
- 274 • Engagement and satisfaction of patients, HCPs, and caregivers as determined using the  
275 Subject Usability and Satisfaction Scale (**Supplemental Figure 1**), the Physician Utility  
276 Survey (**Supplemental Figure 2**), and the Caregiver/Support Person Involvement Scale  
277 (**Supplemental Figure 3**)
- 278 • Personal and social functioning as assessed using the Personal and Social Performance  
279 Scale (**Supplemental Figure 4**)
- 280 • Patient activation as assessed using the Patient Activation Measure-Mental Health Scale  
281 (**Supplemental Figure 5**)
- 282 • The proportion of days that patients and HCPs use the app and dashboard, respectively
- 283 • The proportion of ingested IEM tablets registered on the digital health data server of the  
284 total expected IEM tablets ingested
- 285 • Safety variables will include the frequency and severity of serious adverse events and  
286 device-related nonserious adverse events, suicidality, and any product quality complaints  
287 that may arise. Suicidality will be determined by face-to-face risk assessment according  
288 to each study site's standard operating procedure.

## 289 **Statistical analysis**

290 A sample size of 60 patients was determined based on an anticipated 25% discontinuation rate,  
291 such that  $\geq 45$  patients would complete the 8-week assessment period. The study described is a  
292 feasibility study with no comparisons and no formal power calculations. The sample size was  
293 chosen to contain roughly 20 patients per indication and align with historical studies performed

Study Protocol for DMS use for schizophrenia in the UK  
Revised to address Peer-review

1  
2  
3 294 in the USA. The discontinuation rate is assumed based on similar discontinuations for other  
4  
5 295 psychiatry studies and the fact that an actively clinical stable population is not being recruited.  
6  
7  
8 296 Data will be analyzed in the intent-to-treat population (ie, all patients who enter the trial and use  
9  
10 297 the DMS). All data will be analyzed using descriptive statistics. Continuous variables will be  
11  
12 298 summarized using mean, median, range, and standard deviation. Categorical variables will be  
13  
14 299 summarized using frequency distributions.  
15  
16  
17

### 18 300 **Data protection**

19  
20 301 Before initiating participation, informed consent will be obtained from all patients and  
21  
22 302 caregivers. Health information will be de-identified to the fullest possible extent. However, some  
23  
24 303 identifiers or sensitive health information cannot be stripped (eg, psychiatric medical history,  
25  
26 304 participation in a care program approach, presence of a community treatment order, employment  
27  
28 305 status, disabilities, housing arrangements, or armed forces history). Health information will be  
29  
30 306 used to develop and improve the DMS application and user experience. The DMS and associated  
31  
32 307 third-party vendors are compliant with the General Data Protection Regulation (GDPR), and all  
33  
34 308 accessed health information will be maintained in the strictest confidence and in compliance with  
35  
36 309 the GDPR. Data from the DMS are encrypted in activity and rest and will be accessed only by  
37  
38 310 role-specific individuals for discrete time periods and functions (eg, technical troubleshooting).  
39  
40 311 All data will be completely anonymized for graphical, statistical, and publication purposes.  
41  
42  
43  
44 312 Research staff from NHS sites will store consent documents, demographic forms, and receipts  
45  
46 313 for reimbursement of travel in locked filing cabinets to which only research staff will have  
47  
48 314 access. Accessing of health data will be compliant with IG policies of each participating NHS  
49  
50 315 trust.  
51  
52  
53  
54  
55  
56  
57  
58  
59  
60

Study Protocol for DMS use for schizophrenia in the UK  
Revised to address Peer-review

## 316 **Ethical considerations**

317 Ethics approval for this study was o  
318 btained from London - City & East Research Ethics Committee (REC Ref no. 18/LO/0128), and  
319 clinical trial authorization was provided by the Medicines and Healthcare products Regulatory  
320 Agency. Written informed consent will be obtained from every participant. Ethical issues will be  
321 related to the identification and recruitment of patients, informed consent, and data protection  
322 arrangements. The trial will be conducted in compliance with the International Council for  
323 Harmonisation of Technical Requirements for Pharmaceuticals for Human Use guidelines and  
324 Declaration of Helsinki.

## 325 **Dissemination of study results**

326 The study results will be disseminated through peer-reviewed publications, national and  
327 international conference presentations, and formal clinical trial repositories (eg,  
328 ClinicalTrials.gov). The 5 participating NHS sites will be invited to a results launch event.  
329 Results will be shared with individuals who participated in the workshops via the respective  
330 trusts. Additionally, follow-up workshops are planned to capture further feedback on next steps  
331 for scaling the DMS technology.

## 332 **DISCUSSION**

333 Patient adherence to antipsychotic medication is a crucial component of successful maintenance  
334 therapy for schizophrenia. Knowledge of patient adherence in the absence of positive treatment  
335 outcome is also essential. Subjective means for assessing medication adherence such as clinician  
336 evaluation and patient self-report have low validity [16], and most can only be administered  
337 during patient-HCP visits. Digital medicine offers a means to monitor patient adherence and



Study Protocol for DMS use for schizophrenia in the UK  
Revised to address Peer-review

338 obtain objective data throughout treatment, including periods between office visits, which may  
339 yield more accurate data. For example, a study evaluating nonadherence rates for antipsychotic  
340 medication based on electronic medication bottle caps, which report when pill bottles have been  
341 opened [18], showed a 57% nonadherence rate, much higher than that estimated by patient (5%)  
342 and provider (7%) report [18]. Electronic medication bottle caps are used as the current gold-  
343 standard surrogate for ‘objective’ adherence data. Few reports in this space exist and the need for  
344 more robust objective adherence data is supported through this discrepancy and the limitations of  
345 electronic medication bottle caps as an ‘objective’ measure, given it only measures an  
346 intermediate step in the ingestion process. This study shows the potential of digital medicine to  
347 provide continuous objective data that can inform and improve patient adherence and assist in  
348 clinical decision making. The DMS improves upon approaches such as electronic medication  
349 caps by providing an objective marker of ingestion and not merely a surrogate in addition to  
350 other objective and subjective data.

351 Patient discontinuation is a considerable problem in studies of digital health technology [26].  
352 Studies of early digital health systems for maintenance and counseling of mental disorders  
353 reported low completion rates. For example, a study evaluating a 12-week web-based cognitive  
354 behavioral therapy intervention for panic disorder had a 1% (12/1161) completion rate [27], and  
355 a study evaluating a publicly accessible 5-module web-based cognitive behavioral therapy  
356 program for anxiety and depression had a 0.5% completion rate (97/19,607) [28]. Completion  
357 rates may be particularly low in patients with more severe negative symptoms [22]. Despite these  
358 historically poor completion rates in studies of digital health platforms, results of a meta-analysis  
359 indicate that more than 50% of patients favor managing their mental health through the use of  
360 mobile health technology [29], and the use of mobile devices for health management is viewed

Study Protocol for DMS use for schizophrenia in the UK  
Revised to address Peer-review

361 by patients as normalized and nonstigmatizing [30]. The integrated DMS described here was  
362 developed to leverage the advantages of digital technology to positively influence adherence in  
363 patients with schizophrenia.

364 The DMS is a multimodal, user-friendly system that provides medication reminders and  
365 measures patient ingestion of prescribed antipsychotic medications. The CoE product, in  
366 particular, advances the ability to confirm medication ingestion and to assess adherence on a  
367 continuous basis, which can inform whether uncontrolled symptoms may be explained by  
368 nonadherence. Information from the DMS is made readily available to patients, caregivers (with  
369 the patient's consent), and physicians for supported decision making, proactive intervention, and  
370 individualized care. DMS also provides adherence feedback electronically to the patient, HCP,  
371 and/or caregiver. The DMS provides this feedback discreetly, through user-owned and operated  
372 applications and a patch that is not readily visible as it is worn on the torso underneath clothing,  
373 reducing any potential stigmatization if it (the patch) was visible. The DMS also provides  
374 feedback on activity and rest levels, which is important given that maintenance of a healthy  
375 lifestyle can help address the problems of weight gain and obesity that are related to both  
376 medication side effects and sedentary lifestyles [31]. Furthermore, shifts in activity levels may be  
377 indicative of altered patient disposition.

378 This ongoing study was designed using coproduction methodology to incorporate input from  
379 patients, caregivers, psychiatrists, pharmacists, nurses, and researchers. For all 5 study sites, a  
380 minimum of 2 engagement/setup meetings were conducted and 2 specific patient focus groups  
381 were held to guide protocol development and app design. The exploratory data collected in this  
382 study, although limited to a small number of patients, will help provide a better understanding of

Study Protocol for DMS use for schizophrenia in the UK  
Revised to address Peer-review

383 the ease of use for patients, HCPs, and caregivers to inform the development of future software  
384 or hardware iterations.

385 Given the level of unfamiliarity with digital medicine systems, conducting clinical trials in this  
386 space requires a higher level of stakeholder management and alignment, especially when the trial  
387 is being held in a new environment. Whether it's a new country, a new healthcare system, or a  
388 new set of investigators, formal buy-in and input is critical to participation. The protocol outlines  
389 one way of managing and aligning stakeholders in such an environment - the UK mental health  
390 system. Additionally, and increasingly important within mental health services and interventions  
391 in the UK, is the involvement of end-users, so called service users who have lived experience of  
392 mental health. The methods paper describes a robust engagement strategy using such individuals  
393 in mental health research.

394 Digital health interventions require significant clinician and patient engagement. The protocol  
395 describes an approach to ensure that service users of a digital medicine intervention can assist  
396 with protocol design and system input e.g. approach and appropriate language

## 397 **CONCLUSION**

398 In conclusion, this study will examine the usability and acceptance of the DMS by patients with  
399 schizophrenia, schizoaffective disorder, or first-episode psychosis, and by caregivers and HCPs  
400 in different care settings. The study was coproduced through the engagement of all stakeholders  
401 and, if successful, could be used to support DMS usage in larger cohorts within the United  
402 Kingdom and Europe.

403

## 404 **Funding statement**

Study Protocol for DMS use for schizophrenia in the UK  
Revised to address Peer-review

1  
2  
3 405 This study is supported by Otsuka Pharmaceutical Development & Commercialization, Inc.  
4  
5 406 Editorial support for development of this manuscript was provided by Eric Comeau, PhD, at C4  
6  
7 407 MedSolutions, LLC (Yardley, PA), a CHC Group company, and funded by Otsuka  
8  
9 408 Pharmaceutical Development & Commercialization, Inc.  
10  
11  
12

### 13 409 **Competing interests statement**

14  
15  
16 410 Dr J. Corey Fowler, Dr Jonathan Knights, and Dr Tim Peters-Strickland are employees of Otsuka  
17  
18 411 Pharmaceutical Development & Commercialization. Dr Nathan Cope is an employee of Otsuka  
19  
20 412 Pharmaceutical Europe Ltd. Dr Andrew Makin is an employee of Otsuka Europe Development  
21  
22 413 and Commercialisation. Dr Peter Phiri has no conflict of interest. Dr Shanaya Rathod has  
23  
24 414 received honoraria from Otsuka and Lundbeck for educational sessions.  
25  
26  
27

### 28 415 **Author contributions**

29  
30  
31 416 JCF, NC, JK, PP, AM, TP-S and SR contributed to study conception and design as well as data  
32  
33 417 collection, analysis, and interpretation; JCF, NC, JK, PP, AM, TP-S and SR were responsible for  
34  
35 418 review and critical revision of the manuscript; and JCF, NC, JK, PP, AM, TP-S and SR gave  
36  
37 419 final approval to submit for publication.  
38  
39  
40

### 41 420 **Acknowledgements**

42  
43  
44 421 The authors thank patient advisers and NHS staff from all 5 participating sites (Oxford Health  
45  
46 422 NHS Foundation Trust; Northumberland, Tyne and Wear NHS Foundation Trust; Southern  
47  
48 423 Health NHS Foundation Trust; South London and Maudsley NHS Foundation Trust; and Surrey  
49  
50 424 and Borders Partnership NHS Foundation Trust) for their contributions to the study  
51  
52 425 methodology. Editorial support for development of this manuscript was provided by Eric  
53  
54  
55  
56  
57  
58  
59  
60

Study Protocol for DMS use for schizophrenia in the UK  
Revised to address Peer-review

1  
2  
3 426 Comeau at C4 MedSolutions, LLC (Yardley, PA, USA), a CHC Group company, and funded by  
4

5 427 Otsuka Pharmaceutical Development & Commercialization, Inc.  
6  
7

8  
9 428  
10  
11  
12  
13  
14  
15  
16  
17  
18  
19  
20  
21  
22  
23  
24  
25  
26  
27  
28  
29  
30  
31  
32  
33  
34  
35  
36  
37  
38  
39  
40  
41  
42  
43  
44  
45  
46  
47  
48  
49  
50  
51  
52  
53  
54  
55  
56  
57  
58  
59  
60

Study Protocol for DMS use for schizophrenia in the UK  
Revised to address Peer-review

## 429 REFERENCES

- 430 1. World Health Organization. 2008. The Global Burden of Disease: 2004 update.  
431 [http://www.who.int/healthinfo/global\\_burden\\_disease/GBD\\_report\\_2004update\\_full.pdf?](http://www.who.int/healthinfo/global_burden_disease/GBD_report_2004update_full.pdf?ua=1)  
432 [ua=1](http://www.who.int/healthinfo/global_burden_disease/GBD_report_2004update_full.pdf?ua=1). (accessed June 29, 2018).
- 433 2. Rathod S, Garner C, Griffiths A, et al. Protocol for a multicentre study to assess  
434 feasibility, acceptability, effectiveness and direct costs of TRIumPH (Treatment and  
435 Recovery In Psychosis): integrated care pathway for psychosis. *BMJ Open*  
436 2016;6:e012751. doi:10.1136/bmjopen-2016-012751
- 437 3. Gustavsson A, Svensson M, Jacobi F, et al. Cost of disorders of the brain in Europe 2010.  
438 *Eur Neuropsychopharmacol* 2011;21:718-79. doi:10.1016/j.euroneuro.2011.08.008
- 439 4. Hasan A, Falkai P, Wobrock T, et al. World Federation of Societies of Biological  
440 Psychiatry (WFSBP) guidelines for biological treatment of schizophrenia, part 2: update  
441 2012 on the long-term treatment of schizophrenia and management of antipsychotic-  
442 induced side effects. *World J Biol Psychiatry* 2013;14:2-44.  
443 doi:10.3109/15622975.2012.739708
- 444 5. Kreyenbuhl J, Dixon LB, McCarthy JF, et al. Does adherence to medications for type 2  
445 diabetes differ between individuals with vs without schizophrenia? *Schizophr Bull*  
446 2010;36:428-35. doi:10.1093/schbul/sbn106
- 447 6. Isett KR, Burnam MA, Coleman-Beattie B, et al. The state policy context of  
448 implementation issues for evidence-based practices in mental health. *Psychiatr Serv*  
449 2007;58:914-21. doi:10.1176/appi.ps.58.7.914
- 450 7. Ismail Z, Peters-Strickland T, Miguelez M, et al. Aripiprazole once-monthly in the  
451 treatment of acute psychotic episodes in schizophrenia: post hoc analysis of Positive and

Study Protocol for DMS use for schizophrenia in the UK  
Revised to address Peer-review

- 1  
2  
3 452 Negative Syndrome Scale Marder factor scores. *J Clin Psychopharmacol* 2017;37:347-  
4  
5 453 50. doi:10.1097/JCP.0000000000000710  
6  
7  
8 454 8. Potkin SG, Loze JY, Forray C, et al. Multidimensional assessment of functional  
9  
10 455 outcomes in schizophrenia: results from QUALIFY, a head-to-head trial of aripiprazole  
11  
12 456 once-monthly and paliperidone palmitate. *Int J Neuropsychopharmacol* 2017;20:40-9.  
13  
14 457 doi:10.1093/ijnp/pyw093  
15  
16  
17 458 9. Rathod S, Kingdon D, Smith P, et al. Insight into schizophrenia: the effects of cognitive  
18  
19 459 behavioural therapy on the components of insight and association with  
20  
21 460 sociodemographics--data on a previously published randomised controlled trial.  
22  
23 461 *Schizophr Res* 2005;74:211-9. doi:10.1016/j.schres.2004.07.003  
24  
25  
26 462 10. Sendt KV, Tracy DK, Bhattacharyya S. A systematic review of factors influencing  
27  
28 463 adherence to antipsychotic medication in schizophrenia-spectrum disorders. *Psychiatry*  
29  
30 464 *Res* 2015;225:14-30.  
31  
32  
33 465 11. Lieberman JA, Stroup TS, McEvoy JP, et al. Effectiveness of antipsychotic drugs in  
34  
35 466 patients with chronic schizophrenia. *N Engl J Med* 2005;353:1209-23.  
36  
37 467 doi:10.1056/NEJMoa051688  
38  
39  
40 468 12. Morken G, Widen JH, Grawe RW. Non-adherence to antipsychotic medication, relapse  
41  
42 469 and rehospitalisation in recent-onset schizophrenia. *BMC Psychiatry* 2008;8:32.  
43  
44  
45 470 13. Cutler RL, Fernandez-Llimos F, Frommer M, et al. Economic impact of medication non-  
46  
47 471 adherence by disease groups: a systematic review. *BMJ Open* 2018;8:e016982.  
48  
49 472 doi:10.1136/bmjopen-2017-016982  
50  
51 473 14. McCrone P, Dhanasiri S, Patel A, et al. Paying the Price: The Cost of Mental Health Care  
52  
53 474 in England to 2026. London: King's Fund 2008.

Study Protocol for DMS use for schizophrenia in the UK  
Revised to address Peer-review

- 1  
2  
3 475 15. Gray R, Bressington D, Ivanecka A, et al. Is adherence therapy an effective adjunct  
4  
5 476 treatment for patients with schizophrenia spectrum disorders? A systematic review and  
6  
7 477 meta-analysis. *BMC Psychiatry* 2016;16:90. doi:10.1186/s12888-016-0801-1  
8  
9  
10 478 16. Haddad PM, Brain C, Scott J. Nonadherence with antipsychotic medication in  
11  
12 479 schizophrenia: challenges and management strategies. *Patient Relat Outcome Meas*  
13  
14 480 2014;5:43-62. doi:10.2147/PROM.S42735  
15  
16  
17 481 17. Gutierrez PM, Wortzel HS, Forster JE, et al. Blister packaging medication increases  
18  
19 482 treatment adherence in psychiatric patients. *J Psychiatr Pract* 2017;23:320-7.  
20  
21  
22 483 18. Byerly MJ, Thompson A, Carmody T, et al. Validity of electronically monitored  
23  
24 484 medication adherence and conventional adherence measures in schizophrenia. *Psychiatr*  
25  
26 485 *Serv* 2007;58:844-7.  
27  
28  
29 486 19. Ben-Zeev D, McHugo GJ, Xie H, et al. Comparing retrospective reports to real-time/real-  
30  
31 487 place mobile assessments in individuals with schizophrenia and a nonclinical comparison  
32  
33 488 group. *Schizophr Bull* 2012;38:396-404. doi:10.1093/schbul/sbr171  
34  
35  
36 489 20. Oorschot M, Lataster T, Thewissen V, et al. Mobile assessment in schizophrenia: a data-  
37  
38 490 driven momentary approach. *Schizophr Bull* 2012;38:405-13. doi:10.1093/schbul/sbr166  
39  
40  
41 491 21. Kimhy D, Delespaul P, Corcoran C, et al. Computerized experience sampling method  
42  
43 492 (ESMc): assessing feasibility and validity among individuals with schizophrenia. *J*  
44  
45 493 *Psychiatr Res* 2006;40:221-30. doi:10.1016/j.jpsychires.2005.09.007  
46  
47  
48 494 22. Granholm E, Ben-Zeev D, Link PC, et al. Mobile Assessment and Treatment for  
49  
50 495 Schizophrenia (MATS): a pilot trial of an interactive text-messaging intervention for  
51  
52 496 medication adherence, socialization, and auditory hallucinations. *Schizophr Bull*  
53  
54 497 2012;38:414-25.  
55  
56  
57  
58  
59  
60



Study Protocol for DMS use for schizophrenia in the UK  
Revised to address Peer-review

- 1  
2  
3 498 23. Rohatagi S, Profit D, Hatch A, et al. Optimization of a digital medicine system in  
4  
5 499 psychiatry. *J Clin Psychiatry* 2016;77:e1101-e7.  
6  
7  
8 500 24. Peters-Strickland T, Pestreich L, Hatch A, Rohatagi S, Baker A, Docherty J,  
9  
10 501 Markovtsova L, Raja P, Weiden P, Walling D. Usability of a novel digital medicine  
11  
12 502 system in adults with schizophrenia treated with sensor-embedded tablets of aripiprazole.  
13  
14 503 *Neuropsychiatr Dis Treat*. 2016, 12: 2587–2594.  
15  
16  
17 504 25. Kopelowicz A, Baker RA, Zhao C, et al. A multicenter, open-label, pilot study evaluating  
18  
19 505 the functionality of an integrated call center for a digital medicine system to optimize  
20  
21 506 monitoring of adherence to oral aripiprazole in adult patients with serious mental illness.  
22  
23 507 *Neuropsychiatr Dis Treat* 2017;13:2641-51. doi:10.2147/NDT.S143091  
24  
25  
26 508 26. Eysenbach G. The law of attrition. *J Med Internet Res* 2005;7:e11.  
27  
28 509 27. Farvolden P, Denisoff E, Selby P, et al. Usage and longitudinal effectiveness of a web-  
29  
30 510 based self-help cognitive behavioral therapy program for panic disorder. *J Med Internet*  
31  
32 511 *Res* 2005;7:e7. doi:10.2196/jmir.7.1.e7  
33  
34  
35 512 28. Christensen H, Griffiths KM, Korten AE, et al. A comparison of changes in anxiety and  
36  
37 513 depression symptoms of spontaneous users and trial participants of a cognitive behavior  
38  
39 514 therapy website. *J Med Internet Res* 2004;6:e46. doi:10.2196/jmir.6.4.e46  
40  
41  
42 515 29. Firth J, Cotter J, Torous J, et al. Mobile phone ownership and endorsement of "mHealth"  
43  
44 516 among people with psychosis: a meta-analysis of cross-sectional studies. *Schizophr Bull*  
45  
46 517 2016;42:448-55. doi:10.1093/schbul/sbv132  
47  
48  
49 518 30. Palmier-Claus JE, Rogers A, Ainsworth J, et al. Integrating mobile-phone based  
50  
51 519 assessment for psychosis into people's everyday lives and clinical care: a qualitative  
52  
53 520 study. *BMC Psychiatry* 2013;13:34.  
54  
55  
56  
57  
58  
59

Study Protocol for DMS use for schizophrenia in the UK  
Revised to address Peer-review

1  
2  
3 521 31. Gossage-Worrall R, Holt RI, Barnard K, et al. STEPWISE - STructured lifestyle  
4  
5 522 Education for People With SchizophrEnia: a study protocol for a randomised controlled  
6  
7 523 trial. *Trials* 2016;17:475. doi:10.1186/s13063-016-1572-1  
8  
9

10  
11 524

12  
13 525  
14  
15  
16  
17  
18  
19  
20  
21  
22  
23  
24  
25  
26  
27  
28  
29  
30  
31  
32  
33  
34  
35  
36  
37  
38  
39  
40  
41  
42  
43  
44  
45  
46  
47  
48  
49  
50  
51  
52  
53  
54  
55  
56  
57  
58  
59  
60

For peer review only

Study Protocol for DMS use for schizophrenia in the UK  
Revised to address Peer-review

1  
2  
3  
4 526 **Figure Legends**

5 527 **Figure 1.** Digital medicine system: co-encapsulated antipsychotic medication with miniature  
6  
7 528 ingestible event marker in tablet (MIT) and compatible medical device. DM=digital medicine;  
8  
9 529 HCP=healthcare professional. Image reprinted from article in npg Digital Medicine [In Press].

10  
11  
12  
13 530 **Figure 2.** Description of coproduction workshops with Southern Health NHS Foundation Trust.  
14  
15 531 DMS=digital medicine system; EIP=Early Intervention in Psychosis; IG=information  
16  
17 532 governance; MoSCoW=must have, should have, could have, won't have; NHS=National Health  
18  
19 533 Service; PANSS=Positive and Negative Syndrome Scale; PPI=Patient and Public Involvement  
20  
21  
22 534 program.

23  
24  
25 535 **Figure 3.** Study design.  
26  
27  
28  
29  
30  
31  
32  
33  
34  
35  
36  
37  
38  
39  
40  
41  
42  
43  
44  
45  
46  
47  
48  
49  
50  
51  
52  
53  
54  
55  
56  
57  
58  
59  
60

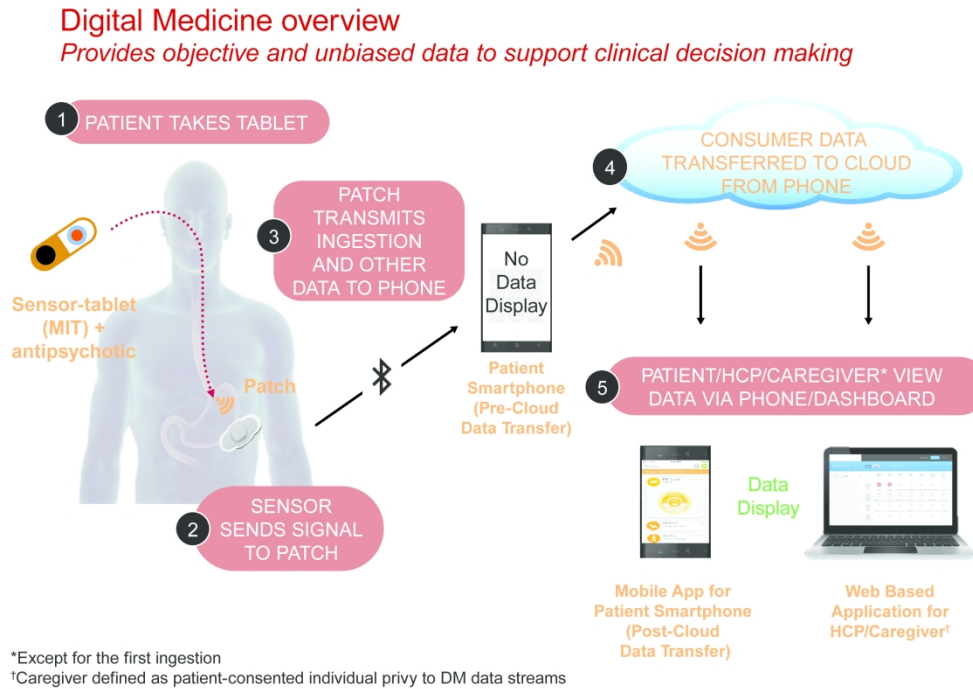

Figure 1. Digital medicine system: co-encapsulated antipsychotic medication with miniature ingestible event marker in tablet (MIT) and compatible medical device. DM=digital medicine; HCP=healthcare professional.

254x177mm (300 x 300 DPI)



Figure 2. Description of coproduction workshops with Southern Health NHS Foundation Trust. DMS=digital medicine system; EIP=Early Intervention in Psychosis; IG=information governance; MoSCoW=must have, should have, could have, won't have; NHS=National Health Service; PANSS=Positive and Negative Syndrome Scale; PPI=Patient and Public Involvement program.

317x184mm (300 x 300 DPI)

1  
2  
3  
4  
5  
6  
7  
8  
9  
10  
11  
12  
13  
14  
15  
16  
17  
18  
19  
20  
21  
22  
23  
24  
25  
26  
27  
28  
29  
30  
31  
32  
33  
34  
35  
36  
37  
38  
39  
40  
41  
42  
43  
44  
45  
46  
47  
48  
49  
50  
51  
52  
53  
54  
55  
56  
57  
58  
59  
60

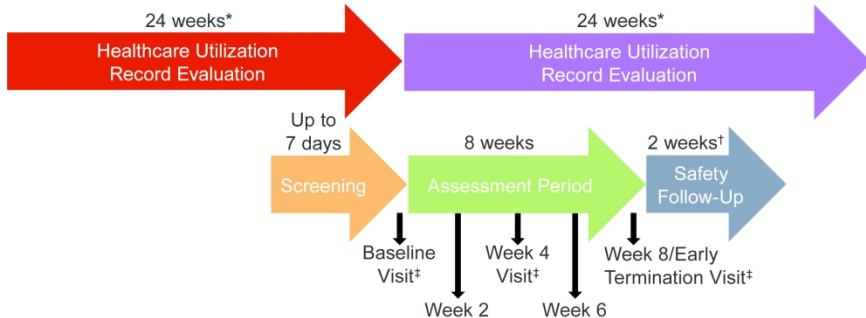

Healthcare professionals (HCPs) will review dashboard at weeks 2, 4, 6, and 8 and make treatment changes at their discretion.  
 \*Healthcare utilization will be recorded 24 weeks before and after baseline visit (for a total of 48 weeks).  
 †Safety follow-up phone call will occur 2 weeks after week 8/early termination visit.  
 ‡Patient visits will occur at baseline, week 4, and week 8/early termination. Other visits will be at the discretion of the HCP.

Figure 3. Study design.

241x108mm (300 x 300 DPI)

## Supplementary Material

### Supplemental Figure 1. Subject Usability and Satisfaction Scale (Ver 2.0)

#### Section A: Usability

##### 1. How easy or difficult was it for you to apply the patch on your body?

| Extremely Difficult | Difficult | Somewhat Difficult | Neutral | Somewhat Easy | Easy | Extremely Easy |
|---------------------|-----------|--------------------|---------|---------------|------|----------------|
| 1                   | 2         | 3                  | 4       | 5             | 6    | 7              |
|                     |           |                    |         |               |      |                |

##### 2. How easy or difficult was it to pair the patch with the mobile phone application (app)?

| Extremely Difficult | Difficult | Somewhat Difficult | Neutral | Somewhat Easy | Easy | Extremely Easy |
|---------------------|-----------|--------------------|---------|---------------|------|----------------|
| 1                   | 2         | 3                  | 4       | 5             | 6    | 7              |
|                     |           |                    |         |               |      |                |

##### 3. How easy or difficult was it for you to use the mobile phone application (app)?

| Extremely Difficult | Difficult | Somewhat Difficult | Neutral | Somewhat Easy | Easy | Extremely Easy |
|---------------------|-----------|--------------------|---------|---------------|------|----------------|
| 1                   | 2         | 3                  | 4       | 5             | 6    | 7              |
|                     |           |                    |         |               |      |                |

##### 4. How easy or difficult was it for you to use the Digital Medicine System?

| Extremely Difficult | Difficult | Somewhat Difficult | Neutral | Somewhat Easy | Easy | Extremely Easy |
|---------------------|-----------|--------------------|---------|---------------|------|----------------|
| 1                   | 2         | 3                  | 4       | 5             | 6    | 7              |
|                     |           |                    |         |               |      |                |

##### 5. How well do you agree with the following statement?

- In general, I did not mind wearing the patch.

| Strongly Disagree | Disagree | Somewhat Disagree | Neutral | Somewhat Agree | Agree | Strongly Agree |
|-------------------|----------|-------------------|---------|----------------|-------|----------------|
| 1                 | 2        | 3                 | 4       | 5              | 6     | 7              |
|                   |          |                   |         |                |       |                |

|  |  |  |  |  |  |  |
|--|--|--|--|--|--|--|
|  |  |  |  |  |  |  |
|--|--|--|--|--|--|--|

**6. Since your last visit, did you receive assistance when changing and pairing the required patches? Yes No**

If yes,

|                                                                  | Never | Once a month or less | A few times a month | Once a week | A few times a week | Daily |
|------------------------------------------------------------------|-------|----------------------|---------------------|-------------|--------------------|-------|
| How much assistance did you receive when applying the patches?   |       |                      |                     |             |                    |       |
| How much assistance did you receive when syncing the technology? |       |                      |                     |             |                    |       |

If you did receive any help or assistance, who helped or assisted you?  
(please place a √ [check] to indicate who helped or assisted you)

| Friend | Hired Caregiver | Relative* | Other** |
|--------|-----------------|-----------|---------|
|        |                 |           |         |

\*If a relative helped or assisted you, then please specify their relationship to you (such as wife, husband, father, mother, sister, brother, or whatever else you think is the most appropriate description of the relative who helped you): \_\_\_\_\_

\*\*If you selected "Other", please specify your relationship to the person who helped you

**Section B: Satisfaction**

**7. How easy or difficult was it for you to use the entire Digital Medicine System, which includes the patch, pills, and mobile phone application (app)?**

| Extremely Difficult | Difficult | Somewhat Difficult | Neutral | Somewhat Easy | Easy | Extremely Easy |
|---------------------|-----------|--------------------|---------|---------------|------|----------------|
| 1                   | 2         | 3                  | 4       | 5             | 6    | 7              |
|                     |           |                    |         |               |      |                |



8. How helpful or unhelpful was the Digital Medicine System in the management of your condition?

| Extremely Unhelpful | Unhelpful | Somewhat Unhelpful | Neutral | Somewhat Helpful | Helpful | Extremely Helpful |
|---------------------|-----------|--------------------|---------|------------------|---------|-------------------|
| 1                   | 2         | 3                  | 4       | 5                | 6       | 7                 |
|                     |           |                    |         |                  |         |                   |

9. How helpful or unhelpful was the Digital Medicine System for sharing information with your healthcare professionals to help you understand your treatment plan?

| Extremely Unhelpful | Unhelpful | Somewhat Unhelpful | Neutral | Somewhat Helpful | Helpful | Extremely Helpful |
|---------------------|-----------|--------------------|---------|------------------|---------|-------------------|
| 1                   | 2         | 3                  | 4       | 5                | 6       | 7                 |
|                     |           |                    |         |                  |         |                   |

10. How helpful or unhelpful was the Digital Medicine System in improving your discussions with your doctor / treatment team?

| Extremely Unhelpful | Unhelpful | Somewhat Unhelpful | Neutral | Somewhat Helpful | Helpful | Extremely Helpful |
|---------------------|-----------|--------------------|---------|------------------|---------|-------------------|
| 1                   | 2         | 3                  | 4       | 5                | 6       | 7                 |
|                     |           |                    |         |                  |         |                   |

11. Based on your experience, how would you rate your satisfaction with the Digital Medicine System?

| Extremely Dissatisfied | Dissatisfied | Somewhat Dissatisfied | Neutral | Somewhat Satisfied | Satisfied | Extremely Satisfied |
|------------------------|--------------|-----------------------|---------|--------------------|-----------|---------------------|
| 1                      | 2            | 3                     | 4       | 5                  | 6         | 7                   |
|                        |              |                       |         |                    |           |                     |

12. How likely would you be to use the Digital Medicine System in the future, if it were available and recommended by your doctor?

| Extremely Unlikely | Unlikely | Somewhat Unlikely | Neutral | Somewhat Likely | Likely | Extremely Likely |
|--------------------|----------|-------------------|---------|-----------------|--------|------------------|
| 1                  | 2        | 3                 | 4       | 5               | 6      | 7                |
|                    |          |                   |         |                 |        |                  |

## Supplemental Figure 2. Physician Utility Survey (Ver 2.0)

We ask the Principal Investigator, Physician Investigator, and Trial Coordinator(s) at a clinical site/trust to complete this survey for each patient enrolled. Please answer the below questions based on your overall experience using DMS.

### 1. How easy or difficult was it for you and your patient to apply the patch on the patient's body?

|                  | Extremel<br>y Difficult | Difficult | Somewhat<br>Difficult | Neutral | Somewhat<br>Easy | Easy | Extremely<br>Easy |
|------------------|-------------------------|-----------|-----------------------|---------|------------------|------|-------------------|
|                  | 1                       | 2         | 3                     | 4       | 5                | 6    | 7                 |
| For you          |                         |           |                       |         |                  |      |                   |
| For your patient |                         |           |                       |         |                  |      |                   |

### 2. How easy or difficult was it for you and your patient to sync the patch with the mobile phone application (app)?

|                  | Extremel<br>y Difficult | Difficult | Somewhat<br>Difficult | Neutral | Somewhat<br>Easy | Easy | Extremely<br>Easy |
|------------------|-------------------------|-----------|-----------------------|---------|------------------|------|-------------------|
|                  | 1                       | 2         | 3                     | 4       | 5                | 6    | 7                 |
| For you          |                         |           |                       |         |                  |      |                   |
| For your patient |                         |           |                       |         |                  |      |                   |

### 3. How easy or difficult was it for you and your patient to complete the overall onboarding for the Digital Medicine System?

|                  | Extremel<br>y Difficult | Difficult | Somewhat<br>Difficult | Neutral | Somewhat<br>Easy | Easy | Extremely<br>Easy |
|------------------|-------------------------|-----------|-----------------------|---------|------------------|------|-------------------|
|                  | 1                       | 2         | 3                     | 4       | 5                | 6    | 7                 |
| For you          |                         |           |                       |         |                  |      |                   |
| For your patient |                         |           |                       |         |                  |      |                   |

### 4. Overall, how easy or difficult was it for you and your patient to use the mobile phone application (app)?

|                  | Extremel<br>y Difficult | Difficult | Somewhat<br>Difficult | Neutral | Somewhat<br>Easy | Easy | Extremely<br>Easy |
|------------------|-------------------------|-----------|-----------------------|---------|------------------|------|-------------------|
|                  | 1                       | 2         | 3                     | 4       | 5                | 6    | 7                 |
| For you          |                         |           |                       |         |                  |      |                   |
| For your patient |                         |           |                       |         |                  |      |                   |

### 5. Overall, how easy or difficult was it for you and your patient to use the entire Digital Medicine System, which includes the patch, pills, and mobile phone application (app)?

|                  | Extremel<br>y Difficult | Difficult | Somewhat<br>Difficult | Neutral | Somewhat<br>Easy | Easy | Extremel<br>y Easy |
|------------------|-------------------------|-----------|-----------------------|---------|------------------|------|--------------------|
|                  | 1                       | 2         | 3                     | 4       | 5                | 6    | 7                  |
| For you          |                         |           |                       |         |                  |      |                    |
| For your patient |                         |           |                       |         |                  |      |                    |

### 6. How easy or difficult was it for you to use the HCP dashboard?

| Extremely Difficult | Difficult | Somewhat Difficult | Neutral | Somewhat Easy | Easy | Extremely Easy |
|---------------------|-----------|--------------------|---------|---------------|------|----------------|
| 1                   | 2         | 3                  | 4       | 5             | 6    | 7              |

7. If you were in routine clinical practice (ie, in clinical practice without a study protocol), how helpful or unhelpful do you think the Digital Medicine System could be for the following elements of clinical management for this specific patient?

|                                 | Extremely Unhelpful | Unhelpful | Somewhat Unhelpful | Neutral | Somewhat Helpful | Helpful | Extremely Helpful |
|---------------------------------|---------------------|-----------|--------------------|---------|------------------|---------|-------------------|
|                                 | 1                   | 2         | 3                  | 4       | 5                | 6       | 7                 |
| Assessment                      |                     |           |                    |         |                  |         |                   |
| Clinical Advice/Recommendations |                     |           |                    |         |                  |         |                   |
| Treatment Decisions             |                     |           |                    |         |                  |         |                   |

8. How effective was the Digital Medicine System in aiding decision-making for medication adherence?

| Extremely Not Effective | Not Effective to Use | Somewhat Not Effective to Use | Neutral | Somewhat Effective to Use | Effective to Use | Extremely Effective to Use |
|-------------------------|----------------------|-------------------------------|---------|---------------------------|------------------|----------------------------|
| 1                       | 2                    | 3                             | 4       | 5                         | 6                | 7                          |

9. How helpful or unhelpful was the Digital Medicine System in providing a way to better engage your patients in self-management of their condition?

| Extremely Unhelpful | Unhelpful | Somewhat Unhelpful | Neutral | Somewhat Helpful | Helpful | Extremely Helpful |
|---------------------|-----------|--------------------|---------|------------------|---------|-------------------|
| 1                   | 2         | 3                  | 4       | 5                | 6       | 7                 |

10. How helpful or unhelpful was the Digital Medicine System in improving quality of care for your patient?

| Extremely Unhelpful | Unhelpful | Somewhat Unhelpful | Neutral | Somewhat Helpful | Helpful | Extremely Helpful |
|---------------------|-----------|--------------------|---------|------------------|---------|-------------------|
| 1                   | 2         | 3                  | 4       | 5                | 6       | 7                 |

1  
2  
3  
4 **11. How helpful or unhelpful was the Digital Medicine System in improving your conversations with**  
5 **your patient about their treatment plan and progress?**  
6

| Extremely Unhelpful | Unhelpful | Somewhat Unhelpful | Neutral | Somewhat Helpful | Helpful | Extremely Helpful |
|---------------------|-----------|--------------------|---------|------------------|---------|-------------------|
| 1                   | 2         | 3                  | 4       | 5                | 6       | 7                 |
|                     |           |                    |         |                  |         |                   |

13 **12. How helpful or unhelpful was the Digital Medicine System in the identification of**  
14 **potential lifestyle changes for your patient (eg sleep and exercise)?**  
15

| Extremely Unhelpful | Unhelpful | Somewhat Unhelpful | Neutral | Somewhat Helpful | Helpful | Extremely Helpful |
|---------------------|-----------|--------------------|---------|------------------|---------|-------------------|
| 1                   | 2         | 3                  | 4       | 5                | 6       | 7                 |
|                     |           |                    |         |                  |         |                   |

22 **13. Other than during the patient visit(s), did you look at the HCP dashboard at other**  
23 **times? Please select all that apply**  
24

|                                            | Place a $\checkmark$ (check) next to the time you referred to the HCP dashboard |
|--------------------------------------------|---------------------------------------------------------------------------------|
| No, only during the patient visit          |                                                                                 |
| Prior to patient visit (same day as visit) |                                                                                 |
| In between visits                          |                                                                                 |
| Other: <i>Please Specify:</i> _____        |                                                                                 |

32 **14. What features did you find helpful? Please select all that apply**  
33

|                                               | Place a $\checkmark$ (check) next to the features you found helpful | For the features you have selected, please rank these features from 1 (most helpful) to 7 (least helpful) in order of helpfulness |
|-----------------------------------------------|---------------------------------------------------------------------|-----------------------------------------------------------------------------------------------------------------------------------|
| Pill ingestion data                           |                                                                     |                                                                                                                                   |
| Patient reported reason code for missed doses |                                                                     |                                                                                                                                   |
| Multiple dose alerts                          |                                                                     |                                                                                                                                   |
| Missed dose alerts                            |                                                                     |                                                                                                                                   |
| Activity                                      |                                                                     |                                                                                                                                   |
| Rest                                          |                                                                     |                                                                                                                                   |
| Patient reported rest quality rating          |                                                                     |                                                                                                                                   |
| Other: <i>Please Specify:</i><br>_____        |                                                                     |                                                                                                                                   |

1  
2  
3 **15. Did you set up alerts to be notified of missed doses? Yes/no**

4 **a. If yes, based on your overall experience, how helpful were the missed dose**  
5 **alerts?**

| Extremely Unhelpful | Unhelpful | Somewhat Unhelpful | Neutral | Somewhat Helpful | Helpful | Extremely Helpful | Not Applicable – No alerts received |
|---------------------|-----------|--------------------|---------|------------------|---------|-------------------|-------------------------------------|
| 1                   | 2         | 3                  | 4       | 5                | 6       | 7                 |                                     |
|                     |           |                    |         |                  |         |                   |                                     |

13 15a. If you received a missed dose alert what action did you take, if any? (If none,  
14 please write N/A) \_\_\_\_\_

16 **16. Did you set up alerts to be notified of multiple doses? Yes/no**

17 **a. If yes, based on your overall experience, how helpful were the multiple dose**  
18 **alerts?**

| Extremely Unhelpful | Unhelpful | Somewhat Unhelpful | Neutral | Somewhat Helpful | Helpful | Extremely Helpful | Not Applicable – No alerts received |
|---------------------|-----------|--------------------|---------|------------------|---------|-------------------|-------------------------------------|
| 1                   | 2         | 3                  | 4       | 5                | 6       | 7                 |                                     |
|                     |           |                    |         |                  |         |                   |                                     |

27 16a. If you received a multiple dose alert what action did you take, if any? (If none, please write  
28 N/A) \_\_\_\_\_

30 **17. How well do you agree with the following statement?**

31 **a. Overall, the Digital Medicine System adds value to my practice.**

| Strongly Disagree | Disagree | Somewhat Disagree | Neutral | Somewhat Agree | Agree | Strongly Agree |
|-------------------|----------|-------------------|---------|----------------|-------|----------------|
| 1                 | 2        | 3                 | 4       | 5              | 6     | 7              |
|                   |          |                   |         |                |       |                |

38 **18. Based on your overall experience with this patient, how would you rate your satisfaction with the**  
39 **Digital Medicine System?**

| Extremely Dissatisfied | Dissatisfied | Somewhat Dissatisfied | Neutral | Somewhat Satisfied | Satisfied | Extremely Satisfied |
|------------------------|--------------|-----------------------|---------|--------------------|-----------|---------------------|
| 1                      | 2            | 3                     | 4       | 5                  | 6         | 7                   |
|                        |              |                       |         |                    |           |                     |

1  
2  
3 **Supplemental Figure 3. Caregiver/Support Person Involvement Scale (Ver 2.0)**  
4  
5

6 **DMS Caregiver/Support Person Involvement Scale**  
7

- 8  
9 **1. Are you aware that the study participant/patient is currently participating in the Digital**  
10 **Medicine study (check one)?**  
11

| Yes | No* |
|-----|-----|
|     |     |

12  
13  
14  
15  
16  
17  
18 **\*If no, stop here and do not answer the rest of the questions on this form.**  
19

- 20  
21 **2. Indicate your relationship to the study participant/patient by placing a √ (check).**  
22

| Friend | Hired Caregiver | Relative* | Other** |
|--------|-----------------|-----------|---------|
|        |                 |           |         |

23  
24  
25  
26  
27  
28 **\*If you are a relative, please specify relationship to the study participant/patient, e.g.,**  
29 **wife, father:**  
30

31 **\*\*If you selected "Other", please specify your relationship to the study**  
32 **participant/patient:**  
33  
34  
35  
36  
37  
38  
39  
40  
41  
42  
43  
44  
45  
46  
47  
48  
49  
50  
51  
52  
53  
54  
55  
56  
57  
58  
59  
60

---

3. How much involvement did you provide the subject with regard to taking medication, pairing the patch, applying the patch, and using the app during the course of the study?

|                                                                                         | Never | Once a month or less | A few times a month | Once a week      | A few times a week | Daily              |
|-----------------------------------------------------------------------------------------|-------|----------------------|---------------------|------------------|--------------------|--------------------|
| How much overall assistance did you provide the subject during the course of the study? |       |                      |                     |                  |                    |                    |
| How much assistance did you provide with patch application?                             |       |                      |                     |                  |                    |                    |
| How much assistance did you provide with syncing the technology?                        |       |                      |                     |                  |                    |                    |
| How much assistance did you provide with using the app?                                 |       |                      |                     |                  |                    |                    |
|                                                                                         | Never | Once a week          | A few times a week  | Nearly every day | Daily              | More than once/day |
| How much overall assistance did you provide during the past week of the study?          |       |                      |                     |                  |                    |                    |

### Clinical Global Impression Scale

#### Clinical Global Impression – Severity Scale (CGI-S)

Considering your total clinical experience with this particular population, how mentally ill is the patient at this time?

0 = Not assessed

4 = Moderately ill

1 = Normal, not at all ill

5 = Markedly ill

2 = Borderline mentally ill

6 = Severely ill

3 = Mildly ill

7 = Among the most extremely ill subjects

#### Supplemental Figure 4. Personal and Social Performance Scale

Original version: Morosini PL, Magliano L, Brambilla L, et al. Development, reliability and acceptability of a new version of the DSM-IV Social and Occupational Functioning Assessment Scale (SOFAS) to assess routine social functioning. *Acta Psychiatr Scand* 2000;101(4):323-9  
Copyright © 2000 John Wiley & Sons, Inc. Reproduced with permission of Blackwell Publishing Ltd.

For peer review only



## Personal and Social Performance Scale (PSP)

The rating is based on four main areas: (a) socially useful activities, including work and study; (b) personal and social relationships; (c) self-care; and (d) disturbing and aggressive behaviors.

Data will be captured in the following format using the PSP descriptions provided below:

|                                                         | Absent                   | Mild                     | Manifest                 | Marked                   | Severe                   | Very Severe              |
|---------------------------------------------------------|--------------------------|--------------------------|--------------------------|--------------------------|--------------------------|--------------------------|
| a. Socially useful activities, including work and study | <input type="checkbox"/> |
| b. Personal and social relationships                    | <input type="checkbox"/> |
| c. Self-care                                            | <input type="checkbox"/> |
| d. Disturbing and aggressive behaviors                  | <input type="checkbox"/> |

The levels of functioning in other areas should be taken into account to adjust the rating inside the decimal level (for instance, from 31 to 40). Suicidal risk is not included in the scale.

| 10-point intervals | PSP descriptions                                                                                                                                                                                                                                             |
|--------------------|--------------------------------------------------------------------------------------------------------------------------------------------------------------------------------------------------------------------------------------------------------------|
| 100–91             | Excellent functioning in all four main areas*. He/she is held in high consideration for his/her good qualities, copes adequately with life problems, is involved in a wide range of interests and activities.                                                |
| 90–81              | Good functioning in all four main areas, presence of only common problems or difficulties.                                                                                                                                                                   |
| 80–71              | Mild difficulties in 1 or more of areas a–c.                                                                                                                                                                                                                 |
| 70–61              | Manifest, but not marked difficulties in 1 or more areas a–c, or mild difficulties in d.                                                                                                                                                                     |
| 60–51              | Marked difficulties in 1 of areas a–c, or manifest difficulties in d.                                                                                                                                                                                        |
| 50–41              | Marked difficulties in 2 or more, or severe difficulties in 1 of areas a–c, with or without manifest difficulties in d.                                                                                                                                      |
| 40–31              | Severe difficulties in 1 and marked difficulties in at least 1 of areas a–c, or marked difficulties in d.                                                                                                                                                    |
| 30–21              | Severe difficulties in 2 of areas a–c, or severe difficulties in d, with or without impairment in areas a–c.                                                                                                                                                 |
| 20–11              | Severe difficulties in all areas a–d, or very severe in d with or without impairment in general areas a–c. If the person reacts to external prompts the suggested scores are 20–16, if not, the suggested scores are 15–11.                                  |
| 10–1               | Lack of autonomy in basic functioning with extreme behaviors but without survival risk (ratings 6–10) or with survival risk, eg, death risk due to malnutrition, dehydration, infections, inability to recognize situation of manifest danger (ratings 5–1). |

**For main areas a–c, the degrees of severity are:**

|                          |                                                                                                                                                                                                                                                                                          |
|--------------------------|------------------------------------------------------------------------------------------------------------------------------------------------------------------------------------------------------------------------------------------------------------------------------------------|
| Absent                   |                                                                                                                                                                                                                                                                                          |
| Mild                     | Not manifest difficulties, known only to someone who is very familiar with the person.                                                                                                                                                                                                   |
| Manifest, but not marked | Difficulties clearly noticeable by everyone, but not interfering substantially with the person's ability to perform his/her role in that area, given the person's socio-cultural context, age, sex and educational levels.                                                               |
| Marked                   | Difficulties heavily interfering with role performance in that area; however, the person is still able to do something without professional or social help, although inadequately and/or occasionally; if helped by someone, he/she may be able reach the previous level of functioning. |
| Severe                   | Difficulties that make the person unable to perform any role in that area, if not professionally helped, or lead the person to a destructive role; however, there are no survival risks.                                                                                                 |
| Very severe              | Impairments and difficulties of such intensity to endanger person's survival.                                                                                                                                                                                                            |

**For general area d, the degrees of severity are:**

|                          |                                                                                                                                                                                |
|--------------------------|--------------------------------------------------------------------------------------------------------------------------------------------------------------------------------|
| Absent                   |                                                                                                                                                                                |
| Mild                     | Mild rudeness, unsociability or whingeing.                                                                                                                                     |
| Manifest, but not marked | Speaking too loudly or speaking to others in a too-familiar manner, or eating in a socially unacceptable manner.                                                               |
| Marked                   | Insulting other in public, breaking or wrecking objects, acting frequently in a socially inappropriate but not dangerous way (eg, stripping in public or urinating in public). |
| Severe                   | Frequent verbal threats or frequent physical assaults, without intention or possibility of severe injuries.                                                                    |
| Very severe              | Frequent aggressive acts, aimed at or likely to cause severe injuries.                                                                                                         |

Occasional is defined as occurring three or more times in the reference period or occurring even less than three times but in circumstances and/or with such a previous history to convince the rater that there is a risk of recurrence in the near future. If the aggressive behavior has been present occasionally, the rating may be decreased by one degree, eg, from severe to marked.

\* Main areas: a = socially useful activities, including work and study; b = personal and social relationships; c = self-care; d = disturbing and aggressive behaviors.

**Guidelines for PSP Total Score**

Ratings from 71–100 reflect only mild difficulties.

Ratings from 31–70 reflect manifest disabilities of various degrees.

Ratings from 1–30 reflect functioning so poor that intensive support or supervision is needed.

## Supplemental Figure 5. Patient Activation Measure-Mental Health Scale

The following questions ask about your feelings regarding your mental healthcare. When you think about mental health and mental health care, how much do you agree or disagree with the following statements? Please circle the answer that you most agree with:

**1.** When all is said and done, I am the person who is responsible for managing my mental health.

|                   |          |       |                |
|-------------------|----------|-------|----------------|
| 1                 | 2        | 3     | 4              |
| Strongly Disagree | Disagree | Agree | Strongly Agree |

**2.** Taking an active role in my own mental health is the most important factor in determining my mental health and ability to function.

|                   |          |       |                |
|-------------------|----------|-------|----------------|
| 1                 | 2        | 3     | 4              |
| Strongly Disagree | Disagree | Agree | Strongly Agree |

**3.** I am confident that I can take actions that will help prevent or minimize some symptoms or problems associated with my mental health condition.

|                   |          |       |                |
|-------------------|----------|-------|----------------|
| 1                 | 2        | 3     | 4              |
| Strongly Disagree | Disagree | Agree | Strongly Agree |

**4.** I know what each of my prescribed mental health medications does.

|                   |          |       |                |
|-------------------|----------|-------|----------------|
| 1                 | 2        | 3     | 4              |
| Strongly Disagree | Disagree | Agree | Strongly Agree |

**5.** I am confident that I can tell when I need to go get mental health care, and when I can handle a mental health problem myself.

|                   |          |       |                |
|-------------------|----------|-------|----------------|
| 1                 | 2        | 3     | 4              |
| Strongly Disagree | Disagree | Agree | Strongly Agree |

**6.** I am confident I can tell my mental health clinician about concerns I have, even when he or she does not ask.

|                   |          |       |                |
|-------------------|----------|-------|----------------|
| 1                 | 2        | 3     | 4              |
| Strongly Disagree | Disagree | Agree | Strongly Agree |

1  
2  
3  
4  
5 **7. I am confident that I can follow through on mental health treatments I need to do at home.**

6  
7                   1                                   2                                   3                                   4  
8  
9 Strongly Disagree                   Disagree                   Agree                   Strongly Agree

10  
11  
12 **8. I understand the nature and causes of my mental health condition(s).**

13  
14                   1                                   2                                   3                                   4  
15  
16 Strongly Disagree                   Disagree                   Agree                   Strongly Agree

17  
18  
19  
20 **9. I know the different treatment options available for my mental health condition(s).**

21  
22                   1                                   2                                   3                                   4  
23  
24 Strongly Disagree                   Disagree                   Agree                   Strongly Agree

25  
26  
27  
28 **10. I am able to maintain the lifestyle changes I have made for my mental health.**

29  
30                   1                                   2                                   3                                   4  
31  
32 Strongly Disagree                   Disagree                   Agree                   Strongly Agree

33  
34  
35 **11. I know how to prevent further mental health problems.**

36  
37                   1                                   2                                   3                                   4  
38  
39 Strongly Disagree                   Disagree                   Agree                   Strongly Agree

40  
41  
42  
43 **12. I am confident I can figure out solutions when new situations or problems arise with my mental health.**

44  
45                   1                                   2                                   3                                   4  
46  
47 Strongly Disagree                   Disagree                   Agree                   Strongly Agree

48  
49  
50  
51 **13. I am confident that I can maintain lifestyle changes, like diet and exercise, even during times of stress.**

52  
53                   1                                   2                                   3                                   4  
54  
55 Strongly Disagree                   Disagree                   Agree                   Strongly Agree

1  
2  
3 Supplemental Material – PRECIS-2 Tool Assessment  
4  
5

6 Whilst the PRECIS-2 tool assessment was not completed during the design of the study, when it  
7 is designed to be conducted, a post assessment use of the tool confirms the use of the term  
8 pragmatic. For example, from the nine PRECIS-2 domains:  
9  
10

11 Eligibility: Would score 4 (out of 5) since those identified in the study would be those identified  
12 in usual care. The study does exclude inpatients, which in the “real world” could in theory  
13 participate but we felt the DMS intervention was of limited benefit in this setting since inpatients  
14 have observed adherence  
15  
16

17 Recruitment: would score 4-5 since recruitment is based simply on screening patient caseloads  
18 and assessment of patients who may need help with adherence measures. No advertisements  
19 have been conducted.  
20  
21

22 Setting: Would score 4-5 since the care settings used in the study are those in usual care. We  
23 have a range of participants from community and specialist mental health services  
24  
25

26 Organisation: Would likely score 3-4 since although the resource/expertise is largely similar to  
27 usual care, the study does use NHS research staff to assist with training and screening, as is  
28 commonplace with all clinical studies in the UK  
29  
30

31 Flexibility (delivery): Would score 3-4 since the study gives patients and HCPs the ability to  
32 follow standard of care but does require specific site visit at w4 and w8 (yet one could argue this  
33 would occur naturally since the w4 visit is to collect a new prescription (which would occur in  
34  
35  
36  
37  
38  
39  
40  
41  
42  
43  
44  
45  
46  
47  
48  
49  
50  
51  
52  
53  
54  
55  
56  
57  
58  
59  
60

1  
2  
3 the real world) and the w8 visit is the completion of the study. Patients do not experience any  
4  
5 other “forced” visits.  
6  
7

8  
9 Flexibility (adherence): Would score 3 since following enrolment if patients do not utilise the  
10  
11 patch/app the site can contact the patient to found out why they are not engaging and try to  
12  
13 encourage; however, this would be the same if the DMS was indeed normal practice; this is the  
14  
15 intention of the tool to promote conversations between visits when individuals are not adherent.  
16  
17

18  
19 Primary outcome: would score 3-4; whilst the outcome may not be obvious to patients, the  
20  
21 outcome has been supported from conversations with HCPs and payers. The good patch  
22  
23 coverage days are essential to provide insight into medication taking so again, if the intervention  
24  
25 become standard, the metric would be used since it would determine whether objective and  
26  
27 insightful data was being captured.  
28  
29  
30

31  
32  
33  
34  
35 Primary analysis: Would score 4 since all individuals will be included in the analysis with all  
36  
37 available data.  
38  
39  
40  
41  
42  
43

44  
45 Based on the above, the average score is approx. 4 which equates to “Rather pragmatic”  
46  
47

48  
49 The reason why the study is not the top score of 5 (Very pragmatic) is that the intervention itself  
50  
51 does cause changes to current care but we are not stating how individuals should respond to these  
52  
53 changes. They are free to decide for themselves.  
54  
55  
56  
57  
58  
59  
60

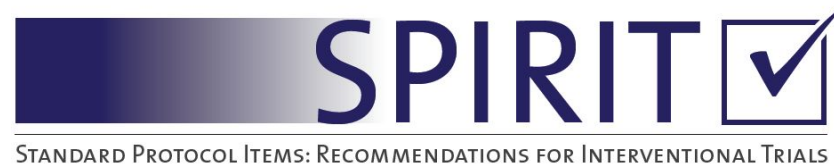

SPIRIT 2013 Checklist: Recommended items to address in a clinical trial protocol and related documents\*

| Section/item                      | Item No | Description                                                                                                                                                                                                                                                                              | Addressed on page number              |
|-----------------------------------|---------|------------------------------------------------------------------------------------------------------------------------------------------------------------------------------------------------------------------------------------------------------------------------------------------|---------------------------------------|
| <b>Administrative information</b> |         |                                                                                                                                                                                                                                                                                          |                                       |
| Title                             | 1       | Descriptive title identifying the study design, population, interventions, and, if applicable, trial acronym                                                                                                                                                                             | <u>Page 1 Line 1</u>                  |
| Trial registration                | 2a      | Trial identifier and registry name. If not yet registered, name of intended registry                                                                                                                                                                                                     | <u>Page 4 Line 64</u>                 |
|                                   | 2b      | All items from the World Health Organization Trial Registration Data Set                                                                                                                                                                                                                 | Provided on <u>ClinicalTrials.gov</u> |
| Protocol version                  | 3       | Date and version identifier                                                                                                                                                                                                                                                              | <u>Page 1 of protocol</u>             |
| Funding                           | 4       | Sources and types of financial, material, and other support                                                                                                                                                                                                                              | <u>Page 20 Line 396</u>               |
| Roles and responsibilities        | 5a      | Names, affiliations, and roles of protocol contributors                                                                                                                                                                                                                                  | <u>Page 21 Line 408</u>               |
|                                   | 5b      | Name and contact information for the trial sponsor                                                                                                                                                                                                                                       | <u>Page 1 Line 22</u>                 |
|                                   | 5c      | Role of study sponsor and funders, if any, in study design; collection, management, analysis, and interpretation of data; writing of the report; and the decision to submit the report for publication, including whether they will have ultimate authority over any of these activities | <u>Page 21 Line 407</u>               |
|                                   | 5d      | Composition, roles, and responsibilities of the coordinating centre, steering committee, endpoint adjudication committee, data management team, and other individuals or groups overseeing the trial, if applicable (see Item 21a for data monitoring committee)                         | <u>Page 21 Line 407</u>               |

1 **Introduction**

2

3 Background and rationale 6a Description of research question and justification for undertaking the trial, including summary of relevant studies (published and unpublished) examining benefits and harms for each intervention [Page 7 Line 137](#)

4

5

6 6b Explanation for choice of comparators [N/A](#)

7

8 Objectives 7 Specific objectives or hypotheses [Page 9 Line 163](#)

9

10 Trial design 8 Description of trial design including type of trial (eg, parallel group, crossover, factorial, single group), allocation ratio, and framework (eg, superiority, equivalence, noninferiority, exploratory) [Page 9 Line 170](#)

11

12

13

14 **Methods: Participants, interventions, and outcomes**

15

16 Study setting 9 Description of study settings (eg, community clinic, academic hospital) and list of countries where data will be collected. Reference to where list of study sites can be obtained [Page 9 Line 176](#)

17

18

19 Eligibility criteria 10 Inclusion and exclusion criteria for participants. If applicable, eligibility criteria for study centres and individuals who will perform the interventions (eg, surgeons, psychotherapists) [Page 10 Line 188](#)

20

21

22 Interventions 11a Interventions for each group with sufficient detail to allow replication, including how and when they will be administered [Page 11 Line 190](#)

23

24

25 11b Criteria for discontinuing or modifying allocated interventions for a given trial participant (eg, drug dose change in response to harms, participant request, or improving/worsening disease) [Page 18 Line 343](#)

26

27

28 11c Strategies to improve adherence to intervention protocols, and any procedures for monitoring adherence (eg, drug tablet return, laboratory tests) [Page 19 Line 358](#)

29

30

31 11d Relevant concomitant care and interventions that are permitted or prohibited during the trial [As listed on each drug label](#)

32

33

34

35 Outcomes 12 Primary, secondary, and other outcomes, including the specific measurement variable (eg, systolic blood pressure), analysis metric (eg, change from baseline, final value, time to event), method of aggregation (eg, median, proportion), and time point for each outcome. Explanation of the clinical relevance of chosen efficacy and harm outcomes is strongly recommended [Page 14 Line 265](#)

36

37

38

39

40

41

42

43

44

45

46



|   |                      |    |                                                                                                                                                                                       |                         |
|---|----------------------|----|---------------------------------------------------------------------------------------------------------------------------------------------------------------------------------------|-------------------------|
| 1 | Participant timeline | 13 | Time schedule of enrolment, interventions (including any run-ins and washouts), assessments, and visits for participants. A schematic diagram is highly recommended (see Figure)      | <u>Figure 3</u>         |
| 2 |                      |    |                                                                                                                                                                                       |                         |
| 3 |                      |    |                                                                                                                                                                                       |                         |
| 4 | Sample size          | 14 | Estimated number of participants needed to achieve study objectives and how it was determined, including clinical and statistical assumptions supporting any sample size calculations | <u>Page 15 Line 282</u> |
| 5 |                      |    |                                                                                                                                                                                       |                         |
| 6 |                      |    |                                                                                                                                                                                       |                         |
| 7 | Recruitment          | 15 | Strategies for achieving adequate participant enrolment to reach target sample size                                                                                                   | <u>Page 13 Line 249</u> |
| 8 |                      |    |                                                                                                                                                                                       |                         |

### Methods: Assignment of interventions (for controlled trials)

#### Allocation:

|    |                                  |     |                                                                                                                                                                                                                                                                                                                                                          |            |
|----|----------------------------------|-----|----------------------------------------------------------------------------------------------------------------------------------------------------------------------------------------------------------------------------------------------------------------------------------------------------------------------------------------------------------|------------|
| 13 | Sequence generation              | 16a | Method of generating the allocation sequence (eg, computer-generated random numbers), and list of any factors for stratification. To reduce predictability of a random sequence, details of any planned restriction (eg, blocking) should be provided in a separate document that is unavailable to those who enrol participants or assign interventions | <u>N/A</u> |
| 14 |                                  |     |                                                                                                                                                                                                                                                                                                                                                          |            |
| 15 |                                  |     |                                                                                                                                                                                                                                                                                                                                                          |            |
| 16 |                                  |     |                                                                                                                                                                                                                                                                                                                                                          |            |
| 17 |                                  |     |                                                                                                                                                                                                                                                                                                                                                          |            |
| 18 |                                  |     |                                                                                                                                                                                                                                                                                                                                                          |            |
| 19 | Allocation concealment mechanism | 16b | Mechanism of implementing the allocation sequence (eg, central telephone; sequentially numbered, opaque, sealed envelopes), describing any steps to conceal the sequence until interventions are assigned                                                                                                                                                | <u>N/A</u> |
| 20 |                                  |     |                                                                                                                                                                                                                                                                                                                                                          |            |
| 21 |                                  |     |                                                                                                                                                                                                                                                                                                                                                          |            |
| 22 |                                  |     |                                                                                                                                                                                                                                                                                                                                                          |            |
| 23 |                                  |     |                                                                                                                                                                                                                                                                                                                                                          |            |
| 24 | Implementation                   | 16c | Who will generate the allocation sequence, who will enrol participants, and who will assign participants to interventions                                                                                                                                                                                                                                | <u>N/A</u> |
| 25 |                                  |     |                                                                                                                                                                                                                                                                                                                                                          |            |
| 26 |                                  |     |                                                                                                                                                                                                                                                                                                                                                          |            |
| 27 | Blinding (masking)               | 17a | Who will be blinded after assignment to interventions (eg, trial participants, care providers, outcome assessors, data analysts), and how                                                                                                                                                                                                                | <u>N/A</u> |
| 28 |                                  |     |                                                                                                                                                                                                                                                                                                                                                          |            |
| 29 |                                  |     |                                                                                                                                                                                                                                                                                                                                                          |            |
| 30 |                                  | 17b | If blinded, circumstances under which unblinding is permissible, and procedure for revealing a participant's allocated intervention during the trial                                                                                                                                                                                                     | <u>N/A</u> |
| 31 |                                  |     |                                                                                                                                                                                                                                                                                                                                                          |            |
| 32 |                                  |     |                                                                                                                                                                                                                                                                                                                                                          |            |

### Methods: Data collection, management, and analysis

|    |                         |     |                                                                                                                                                                                                                                                                                                                                                                                                              |                         |
|----|-------------------------|-----|--------------------------------------------------------------------------------------------------------------------------------------------------------------------------------------------------------------------------------------------------------------------------------------------------------------------------------------------------------------------------------------------------------------|-------------------------|
| 36 | Data collection methods | 18a | Plans for assessment and collection of outcome, baseline, and other trial data, including any related processes to promote data quality (eg, duplicate measurements, training of assessors) and a description of study instruments (eg, questionnaires, laboratory tests) along with their reliability and validity, if known. Reference to where data collection forms can be found, if not in the protocol | <u>Protocol Page 81</u> |
| 37 |                         |     |                                                                                                                                                                                                                                                                                                                                                                                                              |                         |
| 38 |                         |     |                                                                                                                                                                                                                                                                                                                                                                                                              |                         |
| 39 |                         |     |                                                                                                                                                                                                                                                                                                                                                                                                              |                         |
| 40 |                         |     |                                                                                                                                                                                                                                                                                                                                                                                                              |                         |
| 41 |                         |     |                                                                                                                                                                                                                                                                                                                                                                                                              |                         |
| 42 |                         |     |                                                                                                                                                                                                                                                                                                                                                                                                              |                         |

|    |                                 |     |                                                                                                                                                                                                                                                                                                                                       |                                                                     |
|----|---------------------------------|-----|---------------------------------------------------------------------------------------------------------------------------------------------------------------------------------------------------------------------------------------------------------------------------------------------------------------------------------------|---------------------------------------------------------------------|
| 1  |                                 | 18b | Plans to promote participant retention and complete follow-up, including list of any outcome data to be collected for participants who discontinue or deviate from intervention protocols                                                                                                                                             | <u>Page 14 Line 259</u>                                             |
| 2  |                                 |     |                                                                                                                                                                                                                                                                                                                                       |                                                                     |
| 3  |                                 |     |                                                                                                                                                                                                                                                                                                                                       |                                                                     |
| 4  | Data management                 | 19  | Plans for data entry, coding, security, and storage, including any related processes to promote data quality (eg, double data entry; range checks for data values). Reference to where details of data management procedures can be found, if not in the protocol                                                                     | <u>Protocol Page 73</u>                                             |
| 5  |                                 |     |                                                                                                                                                                                                                                                                                                                                       |                                                                     |
| 6  |                                 |     |                                                                                                                                                                                                                                                                                                                                       |                                                                     |
| 7  |                                 |     |                                                                                                                                                                                                                                                                                                                                       |                                                                     |
| 8  | Statistical methods             | 20a | Statistical methods for analysing primary and secondary outcomes. Reference to where other details of the statistical analysis plan can be found, if not in the protocol                                                                                                                                                              | <u>Protocol Page 73</u>                                             |
| 9  |                                 |     |                                                                                                                                                                                                                                                                                                                                       |                                                                     |
| 10 |                                 |     |                                                                                                                                                                                                                                                                                                                                       |                                                                     |
| 11 |                                 | 20b | Methods for any additional analyses (eg, subgroup and adjusted analyses)                                                                                                                                                                                                                                                              | <u>Page 15 Line 282</u>                                             |
| 12 |                                 |     |                                                                                                                                                                                                                                                                                                                                       |                                                                     |
| 13 |                                 | 20c | Definition of analysis population relating to protocol non-adherence (eg, as randomised analysis), and any statistical methods to handle missing data (eg, multiple imputation)                                                                                                                                                       | <u>Page 15 Line 282</u>                                             |
| 14 |                                 |     |                                                                                                                                                                                                                                                                                                                                       |                                                                     |
| 15 |                                 |     |                                                                                                                                                                                                                                                                                                                                       |                                                                     |
| 16 |                                 |     |                                                                                                                                                                                                                                                                                                                                       |                                                                     |
| 17 | <b>Methods: Monitoring</b>      |     |                                                                                                                                                                                                                                                                                                                                       |                                                                     |
| 18 |                                 |     |                                                                                                                                                                                                                                                                                                                                       |                                                                     |
| 19 | Data monitoring                 | 21a | Composition of data monitoring committee (DMC); summary of its role and reporting structure; statement of whether it is independent from the sponsor and competing interests; and reference to where further details about its charter can be found, if not in the protocol. Alternatively, an explanation of why a DMC is not needed | <u>N/A Pragmatic Trial - Safety of Interventions is Established</u> |
| 20 |                                 |     |                                                                                                                                                                                                                                                                                                                                       |                                                                     |
| 21 |                                 |     |                                                                                                                                                                                                                                                                                                                                       |                                                                     |
| 22 |                                 |     |                                                                                                                                                                                                                                                                                                                                       |                                                                     |
| 23 |                                 |     |                                                                                                                                                                                                                                                                                                                                       |                                                                     |
| 24 |                                 |     |                                                                                                                                                                                                                                                                                                                                       |                                                                     |
| 25 |                                 | 21b | Description of any interim analyses and stopping guidelines, including who will have access to these interim results and make the final decision to terminate the trial                                                                                                                                                               | <u>N/A</u>                                                          |
| 26 |                                 |     |                                                                                                                                                                                                                                                                                                                                       |                                                                     |
| 27 |                                 |     |                                                                                                                                                                                                                                                                                                                                       |                                                                     |
| 28 | Harms                           | 22  | Plans for collecting, assessing, reporting, and managing solicited and spontaneously reported adverse events and other unintended effects of trial interventions or trial conduct                                                                                                                                                     | <u>Protocol Page 66</u>                                             |
| 29 |                                 |     |                                                                                                                                                                                                                                                                                                                                       |                                                                     |
| 30 |                                 |     |                                                                                                                                                                                                                                                                                                                                       |                                                                     |
| 31 | Auditing                        | 23  | Frequency and procedures for auditing trial conduct, if any, and whether the process will be independent from investigators and the sponsor                                                                                                                                                                                           | <u>Protocol Page 81</u>                                             |
| 32 |                                 |     |                                                                                                                                                                                                                                                                                                                                       |                                                                     |
| 33 |                                 |     |                                                                                                                                                                                                                                                                                                                                       |                                                                     |
| 34 |                                 |     |                                                                                                                                                                                                                                                                                                                                       |                                                                     |
| 35 | <b>Ethics and dissemination</b> |     |                                                                                                                                                                                                                                                                                                                                       |                                                                     |
| 36 |                                 |     |                                                                                                                                                                                                                                                                                                                                       |                                                                     |
| 37 | Research ethics approval        | 24  | Plans for seeking research ethics committee/institutional review board (REC/IRB) approval                                                                                                                                                                                                                                             | <u>Page 16 Line 309</u>                                             |
| 38 |                                 |     |                                                                                                                                                                                                                                                                                                                                       |                                                                     |
| 39 |                                 |     |                                                                                                                                                                                                                                                                                                                                       |                                                                     |
| 40 |                                 |     |                                                                                                                                                                                                                                                                                                                                       |                                                                     |
| 41 |                                 |     |                                                                                                                                                                                                                                                                                                                                       |                                                                     |
| 42 |                                 |     |                                                                                                                                                                                                                                                                                                                                       |                                                                     |
| 43 |                                 |     |                                                                                                                                                                                                                                                                                                                                       |                                                                     |
| 44 |                                 |     |                                                                                                                                                                                                                                                                                                                                       |                                                                     |
| 45 |                                 |     |                                                                                                                                                                                                                                                                                                                                       |                                                                     |
| 46 |                                 |     |                                                                                                                                                                                                                                                                                                                                       |                                                                     |

|    |                               |     |                                                                                                                                                                                                                                                                                     |                                               |
|----|-------------------------------|-----|-------------------------------------------------------------------------------------------------------------------------------------------------------------------------------------------------------------------------------------------------------------------------------------|-----------------------------------------------|
| 1  | Protocol amendments           | 25  | Plans for communicating important protocol modifications (eg, changes to eligibility criteria, outcomes, analyses) to relevant parties (eg, investigators, REC/IRBs, trial participants, trial registries, journals, regulators)                                                    | <a href="#">Updates to ClinicalTrials.gov</a> |
| 2  |                               |     |                                                                                                                                                                                                                                                                                     |                                               |
| 3  |                               |     |                                                                                                                                                                                                                                                                                     |                                               |
| 4  |                               |     |                                                                                                                                                                                                                                                                                     |                                               |
| 5  | Consent or assent             | 26a | Who will obtain informed consent or assent from potential trial participants or authorised surrogates, and how (see Item 32)                                                                                                                                                        | <a href="#">Page 15 Line 293</a>              |
| 6  |                               |     |                                                                                                                                                                                                                                                                                     |                                               |
| 7  |                               |     |                                                                                                                                                                                                                                                                                     |                                               |
| 8  |                               | 26b | Additional consent provisions for collection and use of participant data and biological specimens in ancillary studies, if applicable                                                                                                                                               | <a href="#">N/A</a>                           |
| 9  |                               |     |                                                                                                                                                                                                                                                                                     |                                               |
| 10 |                               |     |                                                                                                                                                                                                                                                                                     |                                               |
| 11 | Confidentiality               | 27  | How personal information about potential and enrolled participants will be collected, shared, and maintained in order to protect confidentiality before, during, and after the trial                                                                                                | <a href="#">Page 15 Line 299</a>              |
| 12 |                               |     |                                                                                                                                                                                                                                                                                     |                                               |
| 13 |                               |     |                                                                                                                                                                                                                                                                                     |                                               |
| 14 | Declaration of interests      | 28  | Financial and other competing interests for principal investigators for the overall trial and each study site                                                                                                                                                                       | <a href="#">Page 21 Line 402</a>              |
| 15 |                               |     |                                                                                                                                                                                                                                                                                     |                                               |
| 16 |                               |     |                                                                                                                                                                                                                                                                                     |                                               |
| 17 |                               |     |                                                                                                                                                                                                                                                                                     |                                               |
| 18 | Access to data                | 29  | Statement of who will have access to the final trial dataset, and disclosure of contractual agreements that limit such access for investigators                                                                                                                                     | <a href="#">Page 17 Line 318</a>              |
| 19 |                               |     |                                                                                                                                                                                                                                                                                     |                                               |
| 20 |                               |     |                                                                                                                                                                                                                                                                                     |                                               |
| 21 | Ancillary and post-trial care | 30  | Provisions, if any, for ancillary and post-trial care, and for compensation to those who suffer harm from trial participation                                                                                                                                                       | <a href="#">N/A</a>                           |
| 22 |                               |     |                                                                                                                                                                                                                                                                                     |                                               |
| 23 |                               |     |                                                                                                                                                                                                                                                                                     |                                               |
| 24 | Dissemination policy          | 31a | Plans for investigators and sponsor to communicate trial results to participants, healthcare professionals, the public, and other relevant groups (eg, via publication, reporting in results databases, or other data sharing arrangements), including any publication restrictions | <a href="#">Protocol page 84</a>              |
| 25 |                               |     |                                                                                                                                                                                                                                                                                     |                                               |
| 26 |                               |     |                                                                                                                                                                                                                                                                                     |                                               |
| 27 |                               |     |                                                                                                                                                                                                                                                                                     |                                               |
| 28 |                               |     |                                                                                                                                                                                                                                                                                     |                                               |
| 29 |                               | 31b | Authorship eligibility guidelines and any intended use of professional writers                                                                                                                                                                                                      | <a href="#">Protocol page 84</a>              |
| 30 |                               |     |                                                                                                                                                                                                                                                                                     |                                               |
| 31 |                               | 31c | Plans, if any, for granting public access to the full protocol, participant-level dataset, and statistical code                                                                                                                                                                     | <a href="#">Not yet determined</a>            |
| 32 |                               |     |                                                                                                                                                                                                                                                                                     |                                               |
| 33 | <b>Appendices</b>             |     |                                                                                                                                                                                                                                                                                     |                                               |
| 34 |                               |     |                                                                                                                                                                                                                                                                                     |                                               |
| 35 | Informed consent materials    | 32  | Model consent form and other related documentation given to participants and authorised surrogates                                                                                                                                                                                  | <a href="#">Protocol Page 107</a>             |
| 36 |                               |     |                                                                                                                                                                                                                                                                                     |                                               |
| 37 |                               |     |                                                                                                                                                                                                                                                                                     |                                               |
| 38 | Biological specimens          | 33  | Plans for collection, laboratory evaluation, and storage of biological specimens for genetic or molecular analysis in the current trial and for future use in ancillary studies, if applicable                                                                                      | <a href="#">N/A</a>                           |
| 39 |                               |     |                                                                                                                                                                                                                                                                                     |                                               |
| 40 |                               |     |                                                                                                                                                                                                                                                                                     |                                               |
| 41 |                               |     |                                                                                                                                                                                                                                                                                     |                                               |
| 42 |                               |     |                                                                                                                                                                                                                                                                                     |                                               |
| 43 |                               |     |                                                                                                                                                                                                                                                                                     |                                               |
| 44 |                               |     |                                                                                                                                                                                                                                                                                     |                                               |
| 45 |                               |     |                                                                                                                                                                                                                                                                                     |                                               |
| 46 |                               |     |                                                                                                                                                                                                                                                                                     |                                               |

1  
2  
3  
4  
5  
6  
7  
8  
9  
10  
11  
12  
13  
14  
15  
16  
17  
18  
19  
20  
21  
22  
23  
24  
25  
26  
27  
28  
29  
30  
31  
32  
33  
34  
35  
36  
37  
38  
39  
40  
41  
42  
43  
44  
45  
46

\*It is strongly recommended that this checklist be read in conjunction with the SPIRIT 2013 Explanation & Elaboration for important clarification on the items. Amendments to the protocol should be tracked and dated. The SPIRIT checklist is copyrighted by the SPIRIT Group under the Creative Commons [“Attribution-NonCommercial-NoDerivs 3.0 Unported”](#) license.

For peer review only

# BMJ Open

## **A Study Protocol for the Hummingbird Study, a Multicenter Exploratory Trial to Assess the Acceptance and Performance of a Digital Medicine System in Adults With Schizophrenia, Schizoaffective Disorder, or First-Episode Psychosis**

|                                 |                                                                                                                                                                                                                                                                                                                                                                                                                                                                                                        |
|---------------------------------|--------------------------------------------------------------------------------------------------------------------------------------------------------------------------------------------------------------------------------------------------------------------------------------------------------------------------------------------------------------------------------------------------------------------------------------------------------------------------------------------------------|
| Journal:                        | <i>BMJ Open</i>                                                                                                                                                                                                                                                                                                                                                                                                                                                                                        |
| Manuscript ID                   | bmjopen-2018-025952.R3                                                                                                                                                                                                                                                                                                                                                                                                                                                                                 |
| Article Type:                   | Protocol                                                                                                                                                                                                                                                                                                                                                                                                                                                                                               |
| Date Submitted by the Author:   | 05-Jun-2019                                                                                                                                                                                                                                                                                                                                                                                                                                                                                            |
| Complete List of Authors:       | Fowler, J.; Otsuka Pharmaceutical Development & Commercialization, Inc.,<br>Cope, Nathan; Otsuka Pharmaceutical Europe Ltd.<br>Knights, Jonathan; Otsuka Pharmaceutical Development & Commercialization, Inc.<br>Phiri, Peter; Southern Health NHS Foundation Trust<br>Makin, Andrew; Otsuka Europe Development and Commercialisation Ltd.<br>Peters-Strickland, Tim; Otsuka Pharmaceutical Development & Commercialization, Inc.<br>Rathod, Shanaya; Southern Health NHS Foundation Trust, Psychiatry |
| <b>Primary Subject Heading</b>: | Mental health                                                                                                                                                                                                                                                                                                                                                                                                                                                                                          |
| Secondary Subject Heading:      | Evidence based practice                                                                                                                                                                                                                                                                                                                                                                                                                                                                                |
| Keywords:                       | Coproduction, digital medicine, schizoaffective disorder, schizophrenia                                                                                                                                                                                                                                                                                                                                                                                                                                |
|                                 |                                                                                                                                                                                                                                                                                                                                                                                                                                                                                                        |

SCHOLARONE™  
Manuscripts

Study Protocol for DMS use for schizophrenia in the UK  
Revised to address Peer-review

1  
2  
3 1 **A Study Protocol for the Hummingbird Study, a Multicenter Exploratory**  
4  
5  
6 2 **Trial to Assess the Acceptance and Performance of a Digital Medicine System**  
7  
8  
9 3 **in Adults With Schizophrenia, Schizoaffective Disorder, or First-Episode**  
10  
11 4 **Psychosis**  
12  
13  
14  
15  
16  
17  
18  
19  
20  
21  
22  
23  
24  
25  
26  
27  
28

29 6 Running title: Study protocol for DMS use in schizophrenia in the UK  
30  
31  
32  
33  
34  
35

36 8 Authors:

37 9 J. Corey Fowler, PhD,<sup>1</sup> Nathan Cope, PhD,<sup>2</sup> Jonathan Knights, PhD,<sup>1</sup> Peter Phiri, PhD,<sup>3</sup> Andrew  
38 10 Makin, MD,<sup>4</sup> Tim Peters-Strickland, MD,<sup>1</sup> Shanaya Rathod, DM, MRCPsych<sup>3</sup>  
39  
40  
41  
42  
43

44 12 Affiliations:

45 13 <sup>1</sup>Otsuka Pharmaceutical Development & Commercialization, Inc., Princeton, NJ, USA; <sup>2</sup>Otsuka  
46 14 Pharmaceutical Europe Ltd., Wexham, UK; <sup>3</sup>Southern Health NHS Foundation Trust,  
47 15 Southampton, UK; <sup>4</sup>Otsuka Europe Development and Commercialisation Ltd., Wexham, UK  
48  
49  
50  
51  
52  
53  
54  
55  
56  
57  
58  
59  
60

61 17 E-mail addresses:

62 18 [corey.fowler@otsuka-us.com](mailto:corey.fowler@otsuka-us.com), [NCope@otsuka-europe.com](mailto:NCope@otsuka-europe.com), [Jonathan.Knights@otsuka-us.com](mailto:Jonathan.Knights@otsuka-us.com),  
63 19 [Peter.Phiri@southernhealth.nhs.uk](mailto:Peter.Phiri@southernhealth.nhs.uk), [AMakin@otsuka-europe.com](mailto:AMakin@otsuka-europe.com), [tim.peters-strickland@otsuka-](mailto:tim.peters-strickland@otsuka-us.com)  
64 20 [us.com](mailto:us.com), [shanayarathod@nhs.net](mailto:shanayarathod@nhs.net)  
65  
66  
67  
68  
69  
70

71 22 Address correspondence to: J. Corey Fowler, PhD

72 23 [corey.fowler@otsuka-us.com](mailto:corey.fowler@otsuka-us.com)

73 24 Associate Director, Global Clinical Development

74 25 Otsuka Pharmaceutical Development & Commercialization, Inc.

75 26 508 Carnegie Center Blvd, Suite 300

76 27 Princeton, NJ 08540, USA

77 28 +1 919 475 4823

Study Protocol for DMS use for schizophrenia in the UK  
Revised to address Peer-review

1  
2  
3 29  
4  
5 30 Word count (max 4000 for BMJ Open): 3988 (Intro through conclusion, not including table)  
6  
7 31 Table count: 1  
8  
9 32 Figure count: 3 (+6 supplemental)  
10  
11 33 Reference count: 31  
12  
13 34  
14  
15 35  
16  
17  
18  
19  
20  
21  
22  
23  
24  
25  
26  
27  
28  
29  
30  
31  
32  
33  
34  
35  
36  
37  
38  
39  
40  
41  
42  
43  
44  
45  
46  
47  
48  
49  
50  
51  
52  
53  
54  
55  
56  
57  
58  
59  
60

Study Protocol for DMS use for schizophrenia in the UK  
Revised to address Peer-review

## 36 ABSTRACT

37 **Introduction** In patients with schizophrenia, medication adherence is important for relapse  
38 prevention, and effective adherence monitoring is essential for treatment planning. A digital  
39 medicine system (DMS) has been developed to objectively monitor patient adherence and  
40 support clinical decision-making regarding treatment choices. This study assesses the acceptance  
41 and performance of the DMS in adults with schizophrenia, schizoaffective disorder, or first-  
42 episode psychosis and in healthcare professionals (HCPs).

43 **Methods/ analysis** This is a multicenter, 8-week, single-arm, open-label pragmatic trial designed  
44 using coproduction methodology. The study will be conducted at 5 National Health Service  
45 Foundation Trusts in the United Kingdom. Patients 18 to 65 years old with a diagnosis of  
46 schizophrenia, schizoaffective disorder, or first-episode psychosis will be eligible. HCPs  
47 (psychiatrists, care coordinators, nurses, pharmacists) researchers, information governance (IG)  
48 personnel, Clinical Commissioning Groups (CCGs), and patients participated in study design and  
49 coproduction. Intervention employed will be the DMS an integrated system comprising an oral  
50 sensor tablet co-encapsulated with an antipsychotic, nonmedicated wearable patch, mobile  
51 application (app), and Web-based dashboard. The co-encapsulation product contains  
52 aripiprazole, olanzapine, quetiapine, or risperidone, as prescribed by the HCP, with a miniature  
53 ingestible event marker (IEM) in tablet. Upon ingestion, the IEM transmits a signal to the patch,  
54 which collects ingestion and physical activity data for processing on the patient's smartphone or  
55 tablet before transmission to a cloud-based server for viewing by patients, caregivers, and HCPs  
56 on secure web portals or mobile apps.

57



Study Protocol for DMS use for schizophrenia in the UK  
Revised to address Peer-review

58 **Ethics and Dissemination** Approval granted by the ethics committee of London-City & East  
59 Research Ethics Committee (REC Ref no. 18/LO/0128), and clinical trial authorization was  
60 provided by the Medicines and Healthcare products Regulatory Agency. Written informed  
61 consent will be obtained from every participant. The trial will be compliant with the International  
62 Council for Harmonisation of Technical Requirements for Pharmaceuticals for Human Use  
63 guidelines and Declaration of Helsinki.

64  
65 ClinicalTrials.gov: NCT03568500; EudraCT 2017-004602-17

## 66 **Keywords**

67 Coproduction, digital medicine, schizoaffective disorder, schizophrenia

## 68 **STRENGTHS AND LIMITATIONS OF THIS STUDY**

- 69 • This study was codeveloped with input from clinical practitioners, researchers, patients,  
70 caregivers, service managers, IG teams, and clinical commissioning groups to obtain  
71 information that will best serve all those involved in the treatment and care of patients  
72 with schizophrenia, schizoaffective disorder, and first-episode psychosis.
- 73 • The digital medicine system (DMS) uses an integrated, user-friendly system to provide  
74 objective feedback on patient medication adherence and physical health parameters, such  
75 as activity and rest levels, as well as voluntary subjective entries regarding mood and rest  
76 quality, to help support treatment decisions and evaluation.
- 77 • Information from the DMS is made readily available to patients, caregivers (with the  
78 patient's consent), and physicians to support clinical decision making, proactive  
79 intervention, and individualized care in near to real time.

Study Protocol for DMS use for schizophrenia in the UK  
Revised to address Peer-review

- 1  
2  
3 80      • Possible limitations of this study are the small sample size (N=60), limited  
4  
5  
6 81            generalizability to the broader pool of UK mental health patients and providers, and the  
7  
8 82            relatively short 12-week timeframe.
- 9  
10 83      • The DMS was not developed for all mental health patients, but for a subset of patients  
11  
12 84            who realize they have difficulty with adherence and want to improve their status by self-  
13  
14 85            monitoring with potential for their HCP's to make better clinical decisions based on  
15  
16  
17 86            objective data from the DMS.  
18  
19  
20  
21  
22  
23  
24  
25  
26  
27  
28  
29  
30  
31  
32  
33  
34  
35  
36  
37  
38  
39  
40  
41  
42  
43  
44  
45  
46  
47  
48  
49  
50  
51  
52  
53  
54  
55  
56  
57  
58  
59  
60

Study Protocol for DMS use for schizophrenia in the UK  
Revised to address Peer-review

## 87 INTRODUCTION

88 Schizophrenia has an enormous social and economic burden worldwide, accounting for 1.1% of  
89 total disability-adjusted life-years and 2.7% of years lived with disability [1, 2]. In Europe, the  
90 economic impact of schizophrenia and other psychotic disorders and syndromes in 2010 was  
91 estimated at €93.9 billion [3]. Because schizophrenia is a chronic disease, maintenance treatment  
92 is often necessary to prevent relapse and preserve quality of life over the long term [4, 5].

93 Although antipsychotic medications are effective [6-8], poor insight into schizophrenia can  
94 increase risk of medication nonadherence [9, 10]. In patients with schizophrenia, the rate of  
95 nonadherence to prescribed antipsychotics has been reported to be as high as 74% [11]. Not only  
96 is medication nonadherence burdensome to patients and their families, it also increases the  
97 likelihood of rehospitalization and relapse [12] and contributes substantially to healthcare costs  
98 [13]. In 2005/2006, mean annual psychiatric inpatient and medication costs for patients with  
99 schizophrenia in England were estimated to be approximately £3,000 and £2,000 per patient,  
100 respectively [14].

101 Because medication adherence is important to relapse prevention in schizophrenia [15], effective  
102 adherence monitoring is an essential part of the treatment plan. Although there are various  
103 subjective methods for determining medication adherence, including patient surveys, adherence  
104 diaries, and clinician ratings of patient symptoms and medication side effects, these methods  
105 have low validity [16]. Blister packs and electronic medication bottle caps can provide an  
106 indicator of pill removal or bottle opening and have been shown to improve adherence [17, 18],  
107 but neither technology provides an objective marker of pill ingestion or supports remote  
108 monitoring by healthcare professionals (HCPs). Optimal adherence monitoring and support for

Study Protocol for DMS use for schizophrenia in the UK  
Revised to address Peer-review

109 patients with schizophrenia requires a system that provides physicians with objective information  
110 during interim periods between patient visits.

111 The use of modern technology such as personal digital assistants [19], digital wristwatches [20],  
112 handheld computers [21], and mobile phones [22] to help people with schizophrenia dealing with  
113 their disease has shown success. A digital medicine system (DMS) has been developed as a drug-  
114 device combination to objectively assess and report ingestion of prescription antipsychotics [23].

115 The DMS has 4 main components: an ingestible sensor embedded within an inert tablet, a  
116 nonmedicated wearable sensor (patch) worn by the patient, a mobile application (app), and a  
117 Web-based dashboard [23]. Upon interaction with stomach fluids, the ingestible sensor is  
118 activated and communicates with the wearable sensor, which sends a signal to a Bluetooth-paired  
119 mobile device where it can be viewed by patients or be subsequently viewed by HCPs and  
120 caregivers using secure mobile- and cloud-based software [23]. The DMS also enables patients  
121 to share data on their activity and rest levels as well as subjective data on mood and rest quality,  
122 which can be generated while the patient is engaged with the system. The intention of the DMS  
123 is to encourage greater patient self-management and behavior change while enabling caregivers  
124 and HCPs to provide better care and support both within and outside of office visits, further  
125 engaging patients in their ongoing disease management. The data is communicated to the  
126 psychiatrist that is connected to the patient on the MyCite platform. Additionally, should the  
127 patient choose to share their data, they are able to invite additional healthcare providers,  
128 caregivers and/or family or friends. Recipients of the data, through a web-based password  
129 protected platform, are able to view this data and assist the patient with their treatment plan,  
130 however HCPs can only access the portal for a specific patient once he/she has consented to give  
131 them access to their information in the system. It is envisioned that HCPs will be able to use this

Study Protocol for DMS use for schizophrenia in the UK  
Revised to address Peer-review

132 data to make more informed clinical decisions such as whether individuals need dose adjustment,  
133 medication changes or conversations on lifestyle, adherence or other parameters.

134 Previous results in the USA have shown in an open-label, 8-week study, 78% (47/60) of patients  
135 and 72% (43/60) of HCPs reported being somewhat satisfied, satisfied, or extremely satisfied  
136 with the DMS [24]. Findings from another open-label study showed patients to be actively  
137 involved in their treatment, with 73.5% (36/49) utilizing call centers for technological DMS  
138 support [25]; the rate of ingestion adherence in this study for the 15 patients with schizophrenia  
139 was 85.6% [25].

140 The DMS from the current study (namely the ingestible sensor and the wearable sensor) are  
141 Conformité Européene (CE)–marked for use in Europe as class IIa medical devices (CE 559373),  
142 but studies in European mental health populations have not been performed. Therefore, the  
143 objective of this exploratory study is to assess the acceptance and performance of the DMS  
144 among adult patients with schizophrenia, schizoaffective disorder, or first-episode psychosis and  
145 among HCPs from different care settings in the United Kingdom. We are particularly interested  
146 in assessing the acceptance of the digital medicine technology in individuals from different care  
147 settings. Acceptance will be assessed by study completion and, feedback from subjects from  
148 patient satisfaction surveys. Furthermore, acceptance will also be evaluated by healthcare  
149 providers using the system; this will be assessed by how their clinical decisions altered whilst  
150 using the system and through HCP Utility questionnaire evaluations.

151 In respect to performance, the study will be assessing multiple hardware and software from a  
152 varied population. Based on operational feedback of different phones and OS and any technical  
153 troubleshooting that occurs, the study will be able to determine areas of the app that need to be  
154 enhanced to ensure that the app functions across multiple hardware and operating systems.

Study Protocol for DMS use for schizophrenia in the UK  
Revised to address Peer-review

1  
2  
3 155 Previous studies performed using the DMS were conducted in relatively stable individuals with  
4  
5 156 schizophrenia. For this study, we have broadened the inclusion criteria and will be assessing the  
6  
7 157 technology in a range of clinical groups from different care settings, such as those individuals  
8  
9 158 managed in the community or on specialized services such as Early Intervention in Psychosis  
10  
11 159 services to determine the performance in these different environments.  
12  
13  
14

15 160 The study is not intended to measure and report or make any claims of adherence, but instead, to  
16  
17 161 report the observed ingestions recorded by the DMS. Our goal is to look at the impact of  
18  
19 162 patients' improvements as a result of participation (e.g. reduced need for follow-up care,  
20  
21 163 knowledge of adherence to medication to help physicians decide whether patients are medication  
22  
23 164 compliant or require a long acting injectable or other follow-up care) with the hypothesis that  
24  
25 165 DMS will reduce overall healthcare utilization burden by optimizing treatment decisions.  
26  
27  
28  
29  
30

## 31 166 **METHODS AND ANALYSIS**

  
32  
33  
34

### 35 167 **Study design**

  
36

37 168 This is a multicenter, 8-week, single-arm, open-label trial to evaluate the acceptance and  
38  
39 169 performance of the DMS in adult patients with schizophrenia, schizoaffective disorder, or first-  
40  
41 170 episode psychosis on an oral atypical antipsychotic medication (aripiprazole, olanzapine,  
42  
43 171 quetiapine, or risperidone) and in HCPs. Recruitment began the same day that we submitted to  
44  
45 172 CT.gov, 25/MAY. However, we didn't consent our first patient until 11/JUN and dosing  
46  
47 173 occurred on 18/JUN. The study will take place at 5 institutions in the United Kingdom:  
48  
49 174 Northumberland, Tyne and Wear National Health Service (NHS) Foundation Trust, Surrey and  
50  
51 175 Borders Partnership NHS Foundation Trust, Oxford Health NHS Foundation Trust, South  
52  
53 176 London and Maudsley NHS Foundation Trust, and Southern Health NHS Foundation Trust. The  
54  
55  
56  
57  
58  
59  
60

Study Protocol for DMS use for schizophrenia in the UK  
Revised to address Peer-review

177 first patient's first visit occurred in May 2018. Patient recruitment will be targeted to last  
178 approximately 4 months.

## 179 **Patient selection**

180 Patients for this exploratory study will be identified using database searches conducted at each  
181 study site per HCP discretion. Inclusion and exclusion criteria are provided in **Table 1**. The  
182 degree of clinical stability will be varied across participants that enroll. In short, a fully stable  
183 patient population will not be actively recruited, instead a range of clinical populations (crudely  
184 based on Clinical Global Impression – Severity scale (CGI-S)) from different care settings will  
185 participate.

186 **Table 1. Inclusion and Exclusion Criteria**

| <b>Inclusion criteria</b>                                                                                                                                                                                                                                                                                                                                                                                                                                                                                                                                                                                                                                                                                                                                                                                                                                                                                                                                                                                                                                                                                                                                                                                                                                                                                                                                                                                                                                                                                                                                                                                                                                                                                                                                                                                                                                                    |
|------------------------------------------------------------------------------------------------------------------------------------------------------------------------------------------------------------------------------------------------------------------------------------------------------------------------------------------------------------------------------------------------------------------------------------------------------------------------------------------------------------------------------------------------------------------------------------------------------------------------------------------------------------------------------------------------------------------------------------------------------------------------------------------------------------------------------------------------------------------------------------------------------------------------------------------------------------------------------------------------------------------------------------------------------------------------------------------------------------------------------------------------------------------------------------------------------------------------------------------------------------------------------------------------------------------------------------------------------------------------------------------------------------------------------------------------------------------------------------------------------------------------------------------------------------------------------------------------------------------------------------------------------------------------------------------------------------------------------------------------------------------------------------------------------------------------------------------------------------------------------|
| <ul style="list-style-type: none"> <li>• Willing and able to give written informed consent and adhere to trial procedures</li> <li>• Able to read and understand English</li> <li>• Age 18–65 years at the time of informed consent</li> <li>• Possessing a smartphone and able to use it to interact with the digital medicine system (DMS) application <b>through robust and dependable cellular or wireless internet connections (Subjects should have WiFi at home and/or at work, or at the very least have access to free WiFi hot spots. Alternatively, subjects should have a sufficient data plan from their mobile provider and/or coverage on their phone. Such assessments are made during the screening of potential subjects.)</b></li> <li>• Cooperative, able to ingest oral medication, willing to complete aspects of the trial, and capable of reporting adverse events (AEs)</li> <li>• Clinical diagnosis of schizophrenia, schizoaffective disorder (defined by International Classification of Diseases, Tenth Revision, codes F20 and F25), or first-episode psychosis based on case note review</li> <li>• Prescription for aripiprazole, olanzapine, quetiapine, or risperidone</li> <li>• Fulfills <math>\geq 1</math> of the following: <ul style="list-style-type: none"> <li>○ Discharge from a hospital admission (within 7 days of discharge) to an acute intervention team</li> <li>○ Referral to an acute intervention team before hospital admission</li> <li>○ Referral from an acute intervention team to a community team</li> <li>○ Managed by community services</li> <li>○ Inclusion within early intervention caseload (&lt;3 years from initial symptoms)</li> <li>○ Healthcare professional (HCP) determines the patient would benefit</li> </ul> </li> <li>• General medical condition does not pose additional risk</li> </ul> |

Study Protocol for DMS use for schizophrenia in the UK  
Revised to address Peer-review

- Skin on the anterior chest above the lower edge of the rib cage is free of any dermatologic problem

#### **Exclusion criteria**

- Any disorder that may affect patient's ability to participate in the trial or interact with a smartphone
- Likely to be incapable of using DMS technology, even with assistance
- History or evidence of a medical condition that would expose patient to undue risk of an AE
- Known allergy to adhesive tape or any component of the patch or co-encapsulation product
- Current incarceration in prison system
- Hospitalization at the time of screening due to mental or physical illness
- HCP recommendation to not participate
- Aversion to taking gelatin capsules
- Women who are breastfeeding, pregnant, or plan to become pregnant

187

#### **Intervention**

189 The DMS is an integrated, 4-component system comprising an oral co-encapsulation (CoE)  
190 pharmacologic sensor tablet, a Proteus® Patch, a mobile app, and Otsuka Medical dashboard  
191 software (**Figure 1**). Each CoE product contains an approved antipsychotic medication  
192 (aripiprazole, olanzapine, quetiapine, or risperidone) encapsulated with a miniature ingestible  
193 event marker (IEM) in tablet. HCPs will select the medication and dosage based on each  
194 patient's needs. Upon taking the medication, the IEM transmits a signal to the nonmedicated  
195 patch that is attached to the patient's skin. The patch collects IEM ingestion and physical activity  
196 data, which are then processed by the Patch Analytics Block on the patient's smartphone.  
197 Processed data are transferred through the app on the smartphone and sent to a cloud-based  
198 server for patient, caregiver, and HCP viewing on Otsuka Medical software through web portals  
199 or mobile apps. Patients will have access to the Otsuka Patient Application, caregivers will have



Study Protocol for DMS use for schizophrenia in the UK  
Revised to address Peer-review

200 access (with patient consent) to the Otsuka Caregiver Web Portal, and HCPs will have access to  
201 the Otsuka Healthcare Provider Web Portal.

202

## 203 **Patient and Public Involvement Statement**

### 204 **Coproduction**

205 This study was designed using coproduction methodology involving NHS staff and patients (**Figure 2**).

206 Coproduction in this protocol is the involvement of people with lived experience of mental illness

207 (diagnosed or otherwise) as equal partners alongside other healthcare stakeholders, in the design and

208 contribution to the protocol. The lead site, Southern Health NHS Foundation Trust, held 5 coproduction

209 workshops, and a subset of these workshops was repeated at other study sites to elicit feedback on the

210 study design. At least 2 of these workshops involved patients. The discussions from the workshops

211 addressed pharmacy items for the CoE product; HCP recruitment strategies; and protocols for

212 identification, recruitment, and interactions with suitable patients and their general practitioners.

213 Throughout the various workshops at the different sites, participants included clinicians, pharmacists,

214 researchers, IG personnel (refers to the way in which the NHS handles, stores and processes information,

215 in particular personal and sensitive information relating to patients and employees; it was vital to ensure

216 that IG individuals were happy with the privacy and storage features of the digital medicine system),

217 psychiatrists, care coordinators, nurses, information technology personnel, CCGs (clinically led groups

218 within the NHS that are responsible for the planning and commissioning of healthcare services for their

219 local area), and patients (**Figure 2**).

220

Study Protocol for DMS use for schizophrenia in the UK  
Revised to address Peer-review

## 221 **Patient Involvement**

222 The Patient and Public Involvement and Service User Lead from 2 study sites (Surrey and Borders  
223 Partnership NHS Foundation Trust and Northumberland, Tyne, and Wear NHS Foundation Trust)  
224 engaged service users to participate in a patient focus group. The objective of the focus groups was to  
225 obtain feedback on the app technology and assess the completion of specific app tasks. The groups  
226 identified issues that may have prevented the completion of key tasks and whether greater explanation  
227 would be needed, for instance in ensuring the app could send notifications to patients. Furthermore,  
228 general feedback on colour and language was also obtained.

229

## 230 **Procedures**

231 The study will comprise 3 phases: a screening phase of up to 7 days, an 8-week assessment  
232 phase, and a 2-week safety follow-up (**Figure 3**). Screening and baseline may occur at a single  
233 visit or at 2 visits separated by up to 7 days. At the screening/baseline visit, patients providing  
234 informed consent will receive patches, CoE product, and other supplies and undergo training by  
235 the HCPs on required and correct use of the DMS. HCPs will confirm proper patch application to  
236 the skin and pairing of the patch with the smartphone app when patients commence their usage  
237 of the digital medicine system, so called on boarding. These individuals will either be  
238 psychiatrists or research assistants for the site. During time in-between the only required site  
239 visits at weeks 4 and 8, patients will perform patch changing themselves and be guided, if  
240 required, through videos contained within the app. There is a freephone technical support line to  
241 assist individuals should they wish. Patients will be instructed to wear the patch continuously,  
242 replacing it every 7 days or as needed during the assessment period. An integrated call center  
243 will be available to patients for technical support regarding use of the DMS.

Study Protocol for DMS use for schizophrenia in the UK  
Revised to address Peer-review

244 During the subsequent 8-week assessment period, patients will visit their HCP at weeks 4 and 8  
245 (or at early termination) for clinical evaluation and review of DMS data. At the week 4 visit,  
246 patients will also obtain a prescription refill. HCPs will be required to monitor and review DMS  
247 data at least every 2 weeks, with the option of requesting additional patient visits as needed.  
248 HCPs will also have the ability to modify the patient's treatment plan at their discretion. Safety  
249 and tolerability will be assessed on an ongoing basis throughout the assessment period and  
250 during the subsequent 2-week safety follow-up, during which time a follow-up telephone call  
251 will be made to each study participant.

252 Healthcare utilization record evaluation will occur continuously beginning at the  
253 baseline/screening visit and will span a period ranging from 24 weeks before baseline/screening  
254 to 24 weeks after screening. All hospital admissions will be recorded and categorized as  
255 "planned," "unplanned," "related," or "unrelated" to psychiatric illness. Characteristics of each  
256 HCP encounter will also be recorded, including the nature of the contact; HCP role; whether the  
257 visit was planned or unplanned; whether or not the contact was initiated as a result of the DMS;  
258 and any medication titration, adherence counseling, education, or lifestyle coaching that  
259 occurred.

## 260 **Outcomes**

261 The primary endpoint is the proportion of days with good patch coverage during the assessment  
262 period, which will be defined as having  $\geq 80\%$  patch data available or IEMs detected within each  
263 day of the assessment period. The secondary endpoint is ingestion adherence, defined as the  
264 proportion of detected IEMs to the total expected IEMs ingested on the assessment days that  
265 showed good patch coverage.

Study Protocol for DMS use for schizophrenia in the UK  
Revised to address Peer-review

266 The following exploratory endpoints will also be included:

- 267 • The proportion of time during the assessment period that patients wear their patch
- 268 • Engagement and satisfaction of patients, HCPs, and caregivers as determined using the  
269 Subject Usability and Satisfaction Scale (**Supplemental Figure 1**), the Physician Utility  
270 Survey (**Supplemental Figure 2**), and the Caregiver/Support Person Involvement Scale  
271 (**Supplemental Figure 3**)
- 272 • Personal and social functioning as assessed using the Personal and Social Performance  
273 Scale (**Supplemental Figure 4**)
- 274 • Patient activation as assessed using the Patient Activation Measure-Mental Health Scale  
275 (**Supplemental Figure 5**)
- 276 • The proportion of days that patients and HCPs use the app and dashboard, respectively
- 277 • The proportion of ingested IEM tablets registered on the digital health data server of the  
278 total expected IEM tablets ingested
- 279 • Safety variables will include the frequency and severity of serious adverse events and  
280 device-related nonserious adverse events, suicidality, and any product quality complaints  
281 that may arise. Suicidality will be determined by face-to-face risk assessment according  
282 to each study site's standard operating procedure.

### 283 **Statistical analysis**

284 A sample size of 60 patients was determined based on an anticipated 25% discontinuation rate,  
285 such that  $\geq 45$  patients would complete the 8-week assessment period. The study described is a  
286 feasibility study with no comparisons and no formal power calculations. The sample size was  
287 chosen to contain roughly 20 patients per indication and align with historical studies performed

Study Protocol for DMS use for schizophrenia in the UK  
Revised to address Peer-review

288 in the USA. The discontinuation rate is assumed based on similar discontinuations for other  
289 psychiatry studies and the fact that an actively clinical stable population is not being recruited.  
290 Data will be analyzed in the intent-to-treat population (ie, all patients who enter the trial and use  
291 the DMS). All data will be analyzed using descriptive statistics. Continuous variables will be  
292 summarized using mean, median, range, and standard deviation. Categorical variables will be  
293 summarized using frequency distributions.

### 294 **Data protection**

295 Before initiating participation, informed consent will be obtained from all patients and  
296 caregivers. Health information will be de-identified to the fullest possible extent. However, some  
297 identifiers or sensitive health information cannot be stripped (eg, psychiatric medical history,  
298 participation in a care program approach, presence of a community treatment order, employment  
299 status, disabilities, housing arrangements, or armed forces history). Health information will be  
300 used to develop and improve the DMS application and user experience. The DMS and associated  
301 third-party vendors are compliant with the General Data Protection Regulation (GDPR), and all  
302 accessed health information will be maintained in the strictest confidence and in compliance with  
303 the GDPR. Data from the DMS are encrypted in activity and rest and will be accessed only by  
304 role-specific individuals for discrete time periods and functions (eg, technical troubleshooting).  
305 All data will be completely anonymized for graphical, statistical, and publication purposes.  
306 Research staff from NHS sites will store consent documents, demographic forms, and receipts  
307 for reimbursement of travel in locked filing cabinets to which only research staff will have  
308 access. Accessing of health data will be compliant with IG policies of each participating NHS  
309 trust.

Study Protocol for DMS use for schizophrenia in the UK  
Revised to address Peer-review

### 310 **Ethical considerations**

311 Ethics approval for this study was obtained from London - City & East Research Ethics  
312 Committee (REC Ref no. 18/LO/0128), and clinical trial authorization was provided by the  
313 Medicines and Healthcare products Regulatory Agency. Written informed consent will be  
314 obtained from every participant. Ethical issues will be related to the identification and  
315 recruitment of patients, informed consent, and data protection arrangements. The trial will be  
316 conducted in compliance with the International Council for Harmonisation of Technical  
317 Requirements for Pharmaceuticals for Human Use guidelines and Declaration of Helsinki.

### 318 **Dissemination of study results**

319 The study results will be disseminated through peer-reviewed publications, national and  
320 international conference presentations, and formal clinical trial repositories (eg,  
321 ClinicalTrials.gov). The 5 participating NHS sites will be invited to a results launch event.  
322 Results will be shared with individuals who participated in the workshops via the respective  
323 trusts. Additionally, follow-up workshops are planned to capture further feedback on next steps  
324 for scaling the DMS technology.

### 325 **DISCUSSION**

326 Patient adherence to antipsychotic medication is a crucial component of successful maintenance  
327 therapy for schizophrenia. Knowledge of patient adherence in the absence of positive treatment  
328 outcome is also essential. Subjective means for assessing medication adherence such as clinician  
329 evaluation and patient self-report have low validity [16], and most can only be administered  
330 during patient-HCP visits. Digital medicine offers a means to monitor patient adherence and  
331 obtain objective data throughout treatment, including periods between office visits, which may

Study Protocol for DMS use for schizophrenia in the UK  
Revised to address Peer-review

332 yield more accurate data. For example, a study evaluating nonadherence rates for antipsychotic  
333 medication based on electronic medication bottle caps, which report when pill bottles have been  
334 opened [18], showed a 57% nonadherence rate, much higher than that estimated by patient (5%)  
335 and provider (7%) report [18]. Electronic medication bottle caps are used as the current gold-  
336 standard surrogate for ‘objective’ adherence data. Few reports in this space exist and the need for  
337 more robust objective adherence data is supported through this discrepancy and the limitations of  
338 electronic medication bottle caps as an ‘objective’ measure, given it only measures an  
339 intermediate step in the ingestion process. This study shows the potential of digital medicine to  
340 provide continuous objective data that can inform and improve patient adherence and assist in  
341 clinical decision making. The DMS improves upon approaches such as electronic medication  
342 caps by providing an objective marker of ingestion and not merely a surrogate in addition to  
343 other objective and subjective data.

344 Patient discontinuation is a considerable problem in studies of digital health technology [26].  
345 Studies of early digital health systems for maintenance and counseling of mental disorders  
346 reported low completion rates. For example, a study evaluating a 12-week web-based cognitive  
347 behavioral therapy intervention for panic disorder had a 1% (12/1161) completion rate [27], and  
348 a study evaluating a publicly accessible 5-module web-based cognitive behavioral therapy  
349 program for anxiety and depression had a 0.5% completion rate (97/19,607) [28]. Completion  
350 rates may be particularly low in patients with more severe negative symptoms [22]. Despite these  
351 historically poor completion rates in studies of digital health platforms, results of a meta-analysis  
352 indicate that more than 50% of patients favor managing their mental health through the use of  
353 mobile health technology [29], and the use of mobile devices for health management is viewed  
354 by patients as normalized and nonstigmatizing [30]. The integrated DMS described here was

Study Protocol for DMS use for schizophrenia in the UK  
Revised to address Peer-review

1  
2  
3 355 developed to leverage the advantages of digital technology to positively influence adherence in  
4  
5 356 patients with schizophrenia.  
6  
7  
8 357 The DMS is a multimodal, user-friendly system that provides medication reminders and  
9  
10 358 measures patient ingestion of prescribed antipsychotic medications. The CoE product, in  
11  
12 359 particular, advances the ability to confirm medication ingestion and to assess adherence on a  
13  
14 360 continuous basis, which can inform whether uncontrolled symptoms may be explained by  
15  
16 361 nonadherence. Information from the DMS is made readily available to patients, caregivers (with  
17  
18 362 the patient's consent), and physicians for supported decision making, proactive intervention, and  
19  
20 363 individualized care. DMS also provides adherence feedback electronically to the patient, HCP,  
21  
22 364 and/or caregiver. The DMS provides this feedback discreetly, through user-owned and operated  
23  
24 365 applications and a patch that is not readily visible as it is worn on the torso underneath clothing,  
25  
26 366 reducing any potential stigmatization if it (the patch) was visible. The DMS also provides  
27  
28 367 feedback on activity and rest levels, which is important given that maintenance of a healthy  
29  
30 368 lifestyle can help address the problems of weight gain and obesity that are related to both  
31  
32 369 medication side effects and sedentary lifestyles [31]. Furthermore, shifts in activity levels may be  
33  
34 370 indicative of altered patient disposition.  
35  
36  
37 371 This ongoing study was designed using coproduction methodology to incorporate input from  
38  
39 372 patients, caregivers, psychiatrists, pharmacists, nurses, and researchers. For all 5 study sites, a  
40  
41 373 minimum of 2 engagement/setup meetings were conducted and 2 specific patient focus groups  
42  
43 374 were held to guide protocol development and app design. Although a PRECIS-2 assessment tool  
44  
45 375 was not used during the design of the study the authors feel that based on a retrospective  
46  
47 376 PRECIS-2 analysis (refer to supplemental materials for this analysis) this study does meet the  
48  
49 377 criteria for a pragmatic study. The exploratory data collected in this study, although limited to a  
50  
51  
52  
53  
54  
55  
56  
57  
58  
59  
60



Study Protocol for DMS use for schizophrenia in the UK  
Revised to address Peer-review

378 small number of patients, will help provide a better understanding of the ease of use for patients,  
379 HCPs, and caregivers to inform the development of future software or hardware iterations.  
380 Given the level of unfamiliarity with digital medicine systems, conducting clinical trials in this  
381 space requires a higher level of stakeholder management and alignment, especially when the trial  
382 is being held in a new environment. Whether it's a new country, a new healthcare system, or a  
383 new set of investigators, formal buy-in and input is critical to participation. The protocol outlines  
384 one way of managing and aligning stakeholders in such an environment - the UK mental health  
385 system. Additionally, and increasingly important within mental health services and interventions  
386 in the UK, is the involvement of end-users, so called service users who have lived experience of  
387 mental health. The methods paper describes a robust engagement strategy using such individuals  
388 in mental health research.

389 Digital health interventions require significant clinician and patient engagement. The protocol  
390 describes an approach to ensure that service users of a digital medicine intervention can assist  
391 with protocol design and system input e.g. approach and appropriate language

## 392 **CONCLUSION**

393 In conclusion, this study will examine the usability and acceptance of the DMS by patients with  
394 schizophrenia, schizoaffective disorder, or first-episode psychosis, and by caregivers and HCPs  
395 in different care settings. The study was coproduced through the engagement of all stakeholders  
396 and, if successful, could be used to support DMS usage in larger cohorts within the United  
397 Kingdom and Europe.

398

## 399 **Funding statement**

Study Protocol for DMS use for schizophrenia in the UK  
Revised to address Peer-review

1  
2  
3 400 This study is supported by Otsuka Pharmaceutical Development & Commercialization, Inc.  
4  
5 401 Editorial support for development of this manuscript was provided by Eric Comeau, PhD, at C4  
6  
7 402 MedSolutions, LLC (Yardley, PA), a CHC Group company, and funded by Otsuka  
8  
9 403 Pharmaceutical Development & Commercialization, Inc.  
10  
11  
12

### 13 404 **Competing interests statement**

14  
15  
16 405 Dr J. Corey Fowler, Dr Jonathan Knights, and Dr Tim Peters-Strickland are employees of Otsuka  
17  
18 406 Pharmaceutical Development & Commercialization. Dr Nathan Cope is an employee of Otsuka  
19  
20 407 Pharmaceutical Europe Ltd. Dr Andrew Makin is an employee of Otsuka Europe Development  
21  
22 408 and Commercialisation. Dr Peter Phiri has no conflict of interest. Dr Shanaya Rathod has  
23  
24 409 received honoraria from Otsuka and Lundbeck for educational sessions.  
25  
26  
27

### 28 410 **Author contributions**

29  
30  
31 411 JCF, NC, JK, PP, AM, TP-S and SR contributed to study conception and design as well as data  
32  
33 412 collection, analysis, and interpretation; JCF, NC, JK, PP, AM, TP-S and SR were responsible for  
34  
35 413 review and critical revision of the manuscript; and JCF, NC, JK, PP, AM, TP-S and SR gave  
36  
37 414 final approval to submit for publication.  
38  
39  
40

### 41 415 **Acknowledgements**

42  
43  
44 416 The authors thank patient advisers and NHS staff from all 5 participating sites (Oxford Health  
45  
46 417 NHS Foundation Trust; Northumberland, Tyne and Wear NHS Foundation Trust; Southern  
47  
48 418 Health NHS Foundation Trust; South London and Maudsley NHS Foundation Trust; and Surrey  
49  
50 419 and Borders Partnership NHS Foundation Trust) for their contributions to the study  
51  
52 420 methodology. Editorial support for development of this manuscript was provided by Eric  
53  
54  
55  
56  
57  
58  
59  
60

Study Protocol for DMS use for schizophrenia in the UK  
Revised to address Peer-review

1  
2  
3 421 Comeau at C4 MedSolutions, LLC (Yardley, PA, USA), a CHC Group company, and funded by

4  
5 422 Otsuka Pharmaceutical Development & Commercialization, Inc.

6  
7  
8  
9 423

10  
11  
12  
13  
14  
15  
16  
17  
18  
19  
20  
21  
22  
23  
24  
25  
26  
27  
28  
29  
30  
31  
32  
33  
34  
35  
36  
37  
38  
39  
40  
41  
42  
43  
44  
45  
46  
47  
48  
49  
50  
51  
52  
53  
54  
55  
56  
57  
58  
59  
60

For peer review only

Study Protocol for DMS use for schizophrenia in the UK  
Revised to address Peer-review

## 424 REFERENCES

- 425 1. World Health Organization. 2008. The Global Burden of Disease: 2004 update.  
426 [http://www.who.int/healthinfo/global\\_burden\\_disease/GBD\\_report\\_2004update\\_full.pdf?](http://www.who.int/healthinfo/global_burden_disease/GBD_report_2004update_full.pdf?ua=1)  
427 [ua=1](http://www.who.int/healthinfo/global_burden_disease/GBD_report_2004update_full.pdf?ua=1). (accessed June 29, 2018).
- 428 2. Rathod S, Garner C, Griffiths A, et al. Protocol for a multicentre study to assess  
429 feasibility, acceptability, effectiveness and direct costs of TRIumPH (Treatment and  
430 Recovery In Psychosis): integrated care pathway for psychosis. *BMJ Open*  
431 2016;6:e012751. doi:10.1136/bmjopen-2016-012751
- 432 3. Gustavsson A, Svensson M, Jacobi F, et al. Cost of disorders of the brain in Europe 2010.  
433 *Eur Neuropsychopharmacol* 2011;21:718-79. doi:10.1016/j.euroneuro.2011.08.008
- 434 4. Hasan A, Falkai P, Wobrock T, et al. World Federation of Societies of Biological  
435 Psychiatry (WFSBP) guidelines for biological treatment of schizophrenia, part 2: update  
436 2012 on the long-term treatment of schizophrenia and management of antipsychotic-  
437 induced side effects. *World J Biol Psychiatry* 2013;14:2-44.  
438 doi:10.3109/15622975.2012.739708
- 439 5. Kreyenbuhl J, Dixon LB, McCarthy JF, et al. Does adherence to medications for type 2  
440 diabetes differ between individuals with vs without schizophrenia? *Schizophr Bull*  
441 2010;36:428-35. doi:10.1093/schbul/sbn106
- 442 6. Isett KR, Burnam MA, Coleman-Beattie B, et al. The state policy context of  
443 implementation issues for evidence-based practices in mental health. *Psychiatr Serv*  
444 2007;58:914-21. doi:10.1176/appi.ps.58.7.914
- 445 7. Ismail Z, Peters-Strickland T, Miguelez M, et al. Aripiprazole once-monthly in the  
446 treatment of acute psychotic episodes in schizophrenia: post hoc analysis of Positive and

Study Protocol for DMS use for schizophrenia in the UK  
Revised to address Peer-review

- 1  
2  
3 447 Negative Syndrome Scale Marder factor scores. *J Clin Psychopharmacol* 2017;37:347-  
4  
5 448 50. doi:10.1097/JCP.0000000000000710  
6  
7  
8 449 8. Potkin SG, Loze JY, Forray C, et al. Multidimensional assessment of functional  
9  
10 450 outcomes in schizophrenia: results from QUALIFY, a head-to-head trial of aripiprazole  
11  
12 451 once-monthly and paliperidone palmitate. *Int J Neuropsychopharmacol* 2017;20:40-9.  
13  
14 452 doi:10.1093/ijnp/pyw093  
15  
16  
17 453 9. Rathod S, Kingdon D, Smith P, et al. Insight into schizophrenia: the effects of cognitive  
18  
19 454 behavioural therapy on the components of insight and association with  
20  
21 455 sociodemographics--data on a previously published randomised controlled trial.  
22  
23 456 *Schizophr Res* 2005;74:211-9. doi:10.1016/j.schres.2004.07.003  
24  
25  
26 457 10. Sendt KV, Tracy DK, Bhattacharyya S. A systematic review of factors influencing  
27  
28 458 adherence to antipsychotic medication in schizophrenia-spectrum disorders. *Psychiatry*  
29  
30 459 *Res* 2015;225:14-30.  
31  
32  
33 460 11. Lieberman JA, Stroup TS, McEvoy JP, et al. Effectiveness of antipsychotic drugs in  
34  
35 461 patients with chronic schizophrenia. *N Engl J Med* 2005;353:1209-23.  
36  
37 462 doi:10.1056/NEJMoa051688  
38  
39  
40 463 12. Morken G, Widen JH, Grawe RW. Non-adherence to antipsychotic medication, relapse  
41  
42 464 and rehospitalisation in recent-onset schizophrenia. *BMC Psychiatry* 2008;8:32.  
43  
44  
45 465 13. Cutler RL, Fernandez-Llimos F, Frommer M, et al. Economic impact of medication non-  
46  
47 466 adherence by disease groups: a systematic review. *BMJ Open* 2018;8:e016982.  
48  
49 467 doi:10.1136/bmjopen-2017-016982  
50  
51 468 14. McCrone P, Dhanasiri S, Patel A, et al. Paying the Price: The Cost of Mental Health Care  
52  
53 469 in England to 2026. London: King's Fund 2008.

Study Protocol for DMS use for schizophrenia in the UK  
Revised to address Peer-review

- 1  
2  
3 470 15. Gray R, Bressington D, Ivanecka A, et al. Is adherence therapy an effective adjunct  
4  
5 471 treatment for patients with schizophrenia spectrum disorders? A systematic review and  
6  
7 472 meta-analysis. *BMC Psychiatry* 2016;16:90. doi:10.1186/s12888-016-0801-1  
9  
10 473 16. Haddad PM, Brain C, Scott J. Nonadherence with antipsychotic medication in  
11  
12 474 schizophrenia: challenges and management strategies. *Patient Relat Outcome Meas*  
13  
14 475 2014;5:43-62. doi:10.2147/PROM.S42735  
16  
17 476 17. Gutierrez PM, Wortzel HS, Forster JE, et al. Blister packaging medication increases  
18  
19 477 treatment adherence in psychiatric patients. *J Psychiatr Pract* 2017;23:320-7.  
20  
21 478 18. Byerly MJ, Thompson A, Carmody T, et al. Validity of electronically monitored  
22  
23 479 medication adherence and conventional adherence measures in schizophrenia. *Psychiatr*  
24  
25 480 *Serv* 2007;58:844-7.  
27  
28 481 19. Ben-Zeev D, McHugo GJ, Xie H, et al. Comparing retrospective reports to real-time/real-  
29  
30 482 place mobile assessments in individuals with schizophrenia and a nonclinical comparison  
31  
32 483 group. *Schizophr Bull* 2012;38:396-404. doi:10.1093/schbul/sbr171  
34  
35 484 20. Oorschot M, Lataster T, Thewissen V, et al. Mobile assessment in schizophrenia: a data-  
36  
37 485 driven momentary approach. *Schizophr Bull* 2012;38:405-13. doi:10.1093/schbul/sbr166  
38  
39 486 21. Kimhy D, Delespaul P, Corcoran C, et al. Computerized experience sampling method  
40  
41 487 (ESMc): assessing feasibility and validity among individuals with schizophrenia. *J*  
42  
43 488 *Psychiatr Res* 2006;40:221-30. doi:10.1016/j.jpsychires.2005.09.007  
44  
45 489 22. Granholm E, Ben-Zeev D, Link PC, et al. Mobile Assessment and Treatment for  
46  
47 490 Schizophrenia (MATS): a pilot trial of an interactive text-messaging intervention for  
48  
49 491 medication adherence, socialization, and auditory hallucinations. *Schizophr Bull*  
50  
51 492 2012;38:414-25.  
52  
53  
54  
55  
56  
57  
58  
59  
60

Study Protocol for DMS use for schizophrenia in the UK  
Revised to address Peer-review

- 1  
2  
3 493 23. Rohatagi S, Profit D, Hatch A, et al. Optimization of a digital medicine system in  
4  
5 494 psychiatry. *J Clin Psychiatry* 2016;77:e1101-e7.  
6  
7  
8 495 24. Peters-Strickland T, Pestreich L, Hatch A, Rohatagi S, Baker A, Docherty J,  
9  
10 496 Markovtsova L, Raja P, Weiden P, Walling D. Usability of a novel digital medicine  
11  
12 497 system in adults with schizophrenia treated with sensor-embedded tablets of aripiprazole.  
13  
14 498 *Neuropsychiatr Dis Treat*. 2016, 12: 2587–2594.  
15  
16  
17 499 25. Kopelowicz A, Baker RA, Zhao C, et al. A multicenter, open-label, pilot study evaluating  
18  
19 500 the functionality of an integrated call center for a digital medicine system to optimize  
20  
21 501 monitoring of adherence to oral aripiprazole in adult patients with serious mental illness.  
22  
23 502 *Neuropsychiatr Dis Treat* 2017;13:2641-51. doi:10.2147/NDT.S143091  
24  
25  
26 503 26. Eysenbach G. The law of attrition. *J Med Internet Res* 2005;7:e11.  
27  
28 504 27. Farvolden P, Denisoff E, Selby P, et al. Usage and longitudinal effectiveness of a web-  
29  
30 505 based self-help cognitive behavioral therapy program for panic disorder. *J Med Internet*  
31  
32 506 *Res* 2005;7:e7. doi:10.2196/jmir.7.1.e7  
33  
34  
35 507 28. Christensen H, Griffiths KM, Korten AE, et al. A comparison of changes in anxiety and  
36  
37 508 depression symptoms of spontaneous users and trial participants of a cognitive behavior  
38  
39 509 therapy website. *J Med Internet Res* 2004;6:e46. doi:10.2196/jmir.6.4.e46  
40  
41  
42 510 29. Firth J, Cotter J, Torous J, et al. Mobile phone ownership and endorsement of "mHealth"  
43  
44 511 among people with psychosis: a meta-analysis of cross-sectional studies. *Schizophr Bull*  
45  
46 512 2016;42:448-55. doi:10.1093/schbul/sbv132  
47  
48  
49 513 30. Palmier-Claus JE, Rogers A, Ainsworth J, et al. Integrating mobile-phone based  
50  
51 514 assessment for psychosis into people's everyday lives and clinical care: a qualitative  
52  
53 515 study. *BMC Psychiatry* 2013;13:34.  
54  
55  
56  
57  
58  
59  
60

Study Protocol for DMS use for schizophrenia in the UK  
Revised to address Peer-review

1  
2  
3 516 31. Gossage-Worrall R, Holt RI, Barnard K, et al. STEPWISE - STructured lifestyle  
4  
5 517 Education for People With SchizophrEnia: a study protocol for a randomised controlled  
6  
7 518 trial. *Trials* 2016;17:475. doi:10.1186/s13063-016-1572-1  
9

10  
11 519

12  
13 520  
14  
15  
16  
17  
18  
19  
20  
21  
22  
23  
24  
25  
26  
27  
28  
29  
30  
31  
32  
33  
34  
35  
36  
37  
38  
39  
40  
41  
42  
43  
44  
45  
46  
47  
48  
49  
50  
51  
52  
53  
54  
55  
56  
57  
58  
59  
60

For peer review only



Study Protocol for DMS use for schizophrenia in the UK  
Revised to address Peer-review

1  
2  
3  
4 521 **Figure Legends**

5 522 **Figure 1.** Digital medicine system: co-encapsulated antipsychotic medication with miniature  
6  
7 523 ingestible event marker in tablet (MIT) and compatible medical device. DM=digital medicine;  
8  
9 524 HCP=healthcare professional. Image reprinted from article in npg Digital Medicine [In Press].

10  
11  
12  
13 525 **Figure 2.** Description of coproduction workshops with Southern Health NHS Foundation Trust.

14  
15 526 DMS=digital medicine system; EIP=Early Intervention in Psychosis; IG=information  
16  
17 527 governance; MoSCoW=must have, should have, could have, won't have; NHS=National Health  
18  
19 528 Service; PANSS=Positive and Negative Syndrome Scale; PPI=Patient and Public Involvement  
20  
21  
22 529 program.

23  
24  
25 530 **Figure 3.** Study design.  
26  
27  
28  
29  
30  
31  
32  
33  
34  
35  
36  
37  
38  
39  
40  
41  
42  
43  
44  
45  
46  
47  
48  
49  
50  
51  
52  
53  
54  
55  
56  
57  
58  
59  
60



Figure 1. Digital medicine system: co-encapsulated antipsychotic medication with miniature ingestible event marker in tablet (MIT) and compatible medical device. DM=digital medicine; HCP=healthcare professional.

254x177mm (300 x 300 DPI)



Figure 2. Description of coproduction workshops with Southern Health NHS Foundation Trust. DMS=digital medicine system; EIP=Early Intervention in Psychosis; IG=information governance; MoSCoW=must have, should have, could have, won't have; NHS=National Health Service; PANSS=Positive and Negative Syndrome Scale; PPI=Patient and Public Involvement program.

317x184mm (300 x 300 DPI)

1  
2  
3  
4  
5  
6  
7  
8  
9  
10  
11  
12  
13  
14  
15  
16  
17  
18  
19  
20  
21  
22  
23  
24  
25  
26  
27  
28  
29  
30  
31  
32  
33  
34  
35  
36  
37  
38  
39  
40  
41  
42  
43  
44  
45  
46  
47  
48  
49  
50  
51  
52  
53  
54  
55  
56  
57  
58  
59  
60



Healthcare professionals (HCPs) will review dashboard at weeks 2, 4, 6, and 8 and make treatment changes at their discretion.  
 \*Healthcare utilization will be recorded 24 weeks before and after baseline visit (for a total of 48 weeks).  
 †Safety follow-up phone call will occur 2 weeks after week 8/early termination visit.  
 ‡Patient visits will occur at baseline, week 4, and week 8/early termination. Other visits will be at the discretion of the HCP.

Figure 3. Study design.

241x108mm (300 x 300 DPI)

## Supplementary Material

### Supplemental Figure 1. Subject Usability and Satisfaction Scale (Ver 2.0)

#### Section A: Usability

##### 1. How easy or difficult was it for you to apply the patch on your body?

| Extremely Difficult | Difficult | Somewhat Difficult | Neutral | Somewhat Easy | Easy | Extremely Easy |
|---------------------|-----------|--------------------|---------|---------------|------|----------------|
| 1                   | 2         | 3                  | 4       | 5             | 6    | 7              |
|                     |           |                    |         |               |      |                |

##### 2. How easy or difficult was it to pair the patch with the mobile phone application (app)?

| Extremely Difficult | Difficult | Somewhat Difficult | Neutral | Somewhat Easy | Easy | Extremely Easy |
|---------------------|-----------|--------------------|---------|---------------|------|----------------|
| 1                   | 2         | 3                  | 4       | 5             | 6    | 7              |
|                     |           |                    |         |               |      |                |

##### 3. How easy or difficult was it for you to use the mobile phone application (app)?

| Extremely Difficult | Difficult | Somewhat Difficult | Neutral | Somewhat Easy | Easy | Extremely Easy |
|---------------------|-----------|--------------------|---------|---------------|------|----------------|
| 1                   | 2         | 3                  | 4       | 5             | 6    | 7              |
|                     |           |                    |         |               |      |                |

##### 4. How easy or difficult was it for you to use the Digital Medicine System?

| Extremely Difficult | Difficult | Somewhat Difficult | Neutral | Somewhat Easy | Easy | Extremely Easy |
|---------------------|-----------|--------------------|---------|---------------|------|----------------|
| 1                   | 2         | 3                  | 4       | 5             | 6    | 7              |
|                     |           |                    |         |               |      |                |

##### 5. How well do you agree with the following statement?

- In general, I did not mind wearing the patch.

| Strongly Disagree | Disagree | Somewhat Disagree | Neutral | Somewhat Agree | Agree | Strongly Agree |
|-------------------|----------|-------------------|---------|----------------|-------|----------------|
| 1                 | 2        | 3                 | 4       | 5              | 6     | 7              |
|                   |          |                   |         |                |       |                |

|  |  |  |  |  |  |  |
|--|--|--|--|--|--|--|
|  |  |  |  |  |  |  |
|--|--|--|--|--|--|--|

**6. Since your last visit, did you receive assistance when changing and pairing the required patches? Yes No**

If yes,

|                                                                  | Never | Once a month or less | A few times a month | Once a week | A few times a week | Daily |
|------------------------------------------------------------------|-------|----------------------|---------------------|-------------|--------------------|-------|
| How much assistance did you receive when applying the patches?   |       |                      |                     |             |                    |       |
| How much assistance did you receive when syncing the technology? |       |                      |                     |             |                    |       |

If you did receive any help or assistance, who helped or assisted you?  
(please place a √ [check] to indicate who helped or assisted you)

| Friend | Hired Caregiver | Relative* | Other** |
|--------|-----------------|-----------|---------|
|        |                 |           |         |

\*If a relative helped or assisted you, then please specify their relationship to you (such as wife, husband, father, mother, sister, brother, or whatever else you think is the most appropriate description of the relative who helped you): \_\_\_\_\_

\*\*If you selected "Other", please specify your relationship to the person who helped you  
\_\_\_\_\_

**Section B: Satisfaction**

**7. How easy or difficult was it for you to use the entire Digital Medicine System, which includes the patch, pills, and mobile phone application (app)?**

| Extremely Difficult | Difficult | Somewhat Difficult | Neutral | Somewhat Easy | Easy | Extremely Easy |
|---------------------|-----------|--------------------|---------|---------------|------|----------------|
| 1                   | 2         | 3                  | 4       | 5             | 6    | 7              |
|                     |           |                    |         |               |      |                |

8. How helpful or unhelpful was the Digital Medicine System in the management of your condition?

| Extremely Unhelpful | Unhelpful | Somewhat Unhelpful | Neutral | Somewhat Helpful | Helpful | Extremely Helpful |
|---------------------|-----------|--------------------|---------|------------------|---------|-------------------|
| 1                   | 2         | 3                  | 4       | 5                | 6       | 7                 |
|                     |           |                    |         |                  |         |                   |

9. How helpful or unhelpful was the Digital Medicine System for sharing information with your healthcare professionals to help you understand your treatment plan?

| Extremely Unhelpful | Unhelpful | Somewhat Unhelpful | Neutral | Somewhat Helpful | Helpful | Extremely Helpful |
|---------------------|-----------|--------------------|---------|------------------|---------|-------------------|
| 1                   | 2         | 3                  | 4       | 5                | 6       | 7                 |
|                     |           |                    |         |                  |         |                   |

10. How helpful or unhelpful was the Digital Medicine System in improving your discussions with your doctor / treatment team?

| Extremely Unhelpful | Unhelpful | Somewhat Unhelpful | Neutral | Somewhat Helpful | Helpful | Extremely Helpful |
|---------------------|-----------|--------------------|---------|------------------|---------|-------------------|
| 1                   | 2         | 3                  | 4       | 5                | 6       | 7                 |
|                     |           |                    |         |                  |         |                   |

11. Based on your experience, how would you rate your satisfaction with the Digital Medicine System?

| Extremely Dissatisfied | Dissatisfied | Somewhat Dissatisfied | Neutral | Somewhat Satisfied | Satisfied | Extremely Satisfied |
|------------------------|--------------|-----------------------|---------|--------------------|-----------|---------------------|
| 1                      | 2            | 3                     | 4       | 5                  | 6         | 7                   |
|                        |              |                       |         |                    |           |                     |

12. How likely would you be to use the Digital Medicine System in the future, if it were available and recommended by your doctor?

| Extremely Unlikely | Unlikely | Somewhat Unlikely | Neutral | Somewhat Likely | Likely | Extremely Likely |
|--------------------|----------|-------------------|---------|-----------------|--------|------------------|
| 1                  | 2        | 3                 | 4       | 5               | 6      | 7                |
|                    |          |                   |         |                 |        |                  |

## Supplemental Figure 2. Physician Utility Survey (Ver 2.0)

We ask the Principal Investigator, Physician Investigator, and Trial Coordinator(s) at a clinical site/trust to complete this survey for each patient enrolled. Please answer the below questions based on your overall experience using DMS.

### 1. How easy or difficult was it for you and your patient to apply the patch on the patient's body?

|                  | Extremel<br>y Difficult | Difficult | Somewhat<br>Difficult | Neutral | Somewhat<br>Easy | Easy | Extremely<br>Easy |
|------------------|-------------------------|-----------|-----------------------|---------|------------------|------|-------------------|
|                  | 1                       | 2         | 3                     | 4       | 5                | 6    | 7                 |
| For you          |                         |           |                       |         |                  |      |                   |
| For your patient |                         |           |                       |         |                  |      |                   |

### 2. How easy or difficult was it for you and your patient to sync the patch with the mobile phone application (app)?

|                  | Extremel<br>y Difficult | Difficult | Somewhat<br>Difficult | Neutral | Somewhat<br>Easy | Easy | Extremely<br>Easy |
|------------------|-------------------------|-----------|-----------------------|---------|------------------|------|-------------------|
|                  | 1                       | 2         | 3                     | 4       | 5                | 6    | 7                 |
| For you          |                         |           |                       |         |                  |      |                   |
| For your patient |                         |           |                       |         |                  |      |                   |

### 3. How easy or difficult was it for you and your patient to complete the overall onboarding for the Digital Medicine System?

|                  | Extremel<br>y Difficult | Difficult | Somewhat<br>Difficult | Neutral | Somewhat<br>Easy | Easy | Extremely<br>Easy |
|------------------|-------------------------|-----------|-----------------------|---------|------------------|------|-------------------|
|                  | 1                       | 2         | 3                     | 4       | 5                | 6    | 7                 |
| For you          |                         |           |                       |         |                  |      |                   |
| For your patient |                         |           |                       |         |                  |      |                   |

### 4. Overall, how easy or difficult was it for you and your patient to use the mobile phone application (app)?

|                  | Extremel<br>y Difficult | Difficult | Somewhat<br>Difficult | Neutral | Somewhat<br>Easy | Easy | Extremely<br>Easy |
|------------------|-------------------------|-----------|-----------------------|---------|------------------|------|-------------------|
|                  | 1                       | 2         | 3                     | 4       | 5                | 6    | 7                 |
| For you          |                         |           |                       |         |                  |      |                   |
| For your patient |                         |           |                       |         |                  |      |                   |

### 5. Overall, how easy or difficult was it for you and your patient to use the entire Digital Medicine System, which includes the patch, pills, and mobile phone application (app)?

|                  | Extremel<br>y Difficult | Difficult | Somewhat<br>Difficult | Neutral | Somewhat<br>Easy | Easy | Extremel<br>y Easy |
|------------------|-------------------------|-----------|-----------------------|---------|------------------|------|--------------------|
|                  | 1                       | 2         | 3                     | 4       | 5                | 6    | 7                  |
| For you          |                         |           |                       |         |                  |      |                    |
| For your patient |                         |           |                       |         |                  |      |                    |

### 6. How easy or difficult was it for you to use the HCP dashboard?



| Extremely Difficult | Difficult | Somewhat Difficult | Neutral | Somewhat Easy | Easy | Extremely Easy |
|---------------------|-----------|--------------------|---------|---------------|------|----------------|
| 1                   | 2         | 3                  | 4       | 5             | 6    | 7              |

7. If you were in routine clinical practice (ie, in clinical practice without a study protocol), how helpful or unhelpful do you think the Digital Medicine System could be for the following elements of clinical management for this specific patient?

|                                 | Extremely Unhelpful | Unhelpful | Somewhat Unhelpful | Neutral | Somewhat Helpful | Helpful | Extremely Helpful |
|---------------------------------|---------------------|-----------|--------------------|---------|------------------|---------|-------------------|
|                                 | 1                   | 2         | 3                  | 4       | 5                | 6       | 7                 |
| Assessment                      |                     |           |                    |         |                  |         |                   |
| Clinical Advice/Recommendations |                     |           |                    |         |                  |         |                   |
| Treatment Decisions             |                     |           |                    |         |                  |         |                   |

8. How effective was the Digital Medicine System in aiding decision-making for medication adherence?

| Extremely Not Effective | Not Effective to Use | Somewhat Not Effective to Use | Neutral | Somewhat Effective to Use | Effective to Use | Extremely Effective to Use |
|-------------------------|----------------------|-------------------------------|---------|---------------------------|------------------|----------------------------|
| 1                       | 2                    | 3                             | 4       | 5                         | 6                | 7                          |

9. How helpful or unhelpful was the Digital Medicine System in providing a way to better engage your patients in self-management of their condition?

| Extremely Unhelpful | Unhelpful | Somewhat Unhelpful | Neutral | Somewhat Helpful | Helpful | Extremely Helpful |
|---------------------|-----------|--------------------|---------|------------------|---------|-------------------|
| 1                   | 2         | 3                  | 4       | 5                | 6       | 7                 |

10. How helpful or unhelpful was the Digital Medicine System in improving quality of care for your patient?

| Extremely Unhelpful | Unhelpful | Somewhat Unhelpful | Neutral | Somewhat Helpful | Helpful | Extremely Helpful |
|---------------------|-----------|--------------------|---------|------------------|---------|-------------------|
| 1                   | 2         | 3                  | 4       | 5                | 6       | 7                 |

1  
2  
3  
4 **11. How helpful or unhelpful was the Digital Medicine System in improving your conversations with**  
5 **your patient about their treatment plan and progress?**  
6

| Extremely Unhelpful | Unhelpful | Somewhat Unhelpful | Neutral | Somewhat Helpful | Helpful | Extremely Helpful |
|---------------------|-----------|--------------------|---------|------------------|---------|-------------------|
| 1                   | 2         | 3                  | 4       | 5                | 6       | 7                 |
|                     |           |                    |         |                  |         |                   |

13 **12. How helpful or unhelpful was the Digital Medicine System in the identification of**  
14 **potential lifestyle changes for your patient (eg sleep and exercise)?**  
15

| Extremely Unhelpful | Unhelpful | Somewhat Unhelpful | Neutral | Somewhat Helpful | Helpful | Extremely Helpful |
|---------------------|-----------|--------------------|---------|------------------|---------|-------------------|
| 1                   | 2         | 3                  | 4       | 5                | 6       | 7                 |
|                     |           |                    |         |                  |         |                   |

22 **13. Other than during the patient visit(s), did you look at the HCP dashboard at other**  
23 **times? Please select all that apply**  
24

|                                            | Place a $\checkmark$ (check) next to the time you referred to the HCP dashboard |
|--------------------------------------------|---------------------------------------------------------------------------------|
| No, only during the patient visit          |                                                                                 |
| Prior to patient visit (same day as visit) |                                                                                 |
| In between visits                          |                                                                                 |
| Other: <i>Please Specify:</i> _____        |                                                                                 |

32 **14. What features did you find helpful? Please select all that apply**  
33

|                                               | Place a $\checkmark$ (check) next to the features you found helpful | For the features you have selected, please rank these features from 1 (most helpful) to 7 (least helpful) in order of helpfulness |
|-----------------------------------------------|---------------------------------------------------------------------|-----------------------------------------------------------------------------------------------------------------------------------|
| Pill ingestion data                           |                                                                     |                                                                                                                                   |
| Patient reported reason code for missed doses |                                                                     |                                                                                                                                   |
| Multiple dose alerts                          |                                                                     |                                                                                                                                   |
| Missed dose alerts                            |                                                                     |                                                                                                                                   |
| Activity                                      |                                                                     |                                                                                                                                   |
| Rest                                          |                                                                     |                                                                                                                                   |
| Patient reported rest quality rating          |                                                                     |                                                                                                                                   |
| Other: <i>Please Specify:</i><br>_____        |                                                                     |                                                                                                                                   |

1  
2  
3 **15. Did you set up alerts to be notified of missed doses? Yes/no**

4 **a. If yes, based on your overall experience, how helpful were the missed dose**  
5 **alerts?**

| Extremely Unhelpful | Unhelpful | Somewhat Unhelpful | Neutral | Somewhat Helpful | Helpful | Extremely Helpful | Not Applicable – No alerts received |
|---------------------|-----------|--------------------|---------|------------------|---------|-------------------|-------------------------------------|
| 1                   | 2         | 3                  | 4       | 5                | 6       | 7                 |                                     |
|                     |           |                    |         |                  |         |                   |                                     |

13  
14 15a. If you received a missed dose alert what action did you take, if any? (If none,  
15 please write N/A) \_\_\_\_\_

16 **16. Did you set up alerts to be notified of multiple doses? Yes/no**

17 **a. If yes, based on your overall experience, how helpful were the multiple dose**  
18 **alerts?**

| Extremely Unhelpful | Unhelpful | Somewhat Unhelpful | Neutral | Somewhat Helpful | Helpful | Extremely Helpful | Not Applicable – No alerts received |
|---------------------|-----------|--------------------|---------|------------------|---------|-------------------|-------------------------------------|
| 1                   | 2         | 3                  | 4       | 5                | 6       | 7                 |                                     |
|                     |           |                    |         |                  |         |                   |                                     |

26  
27 16a. If you received a multiple dose alert what action did you take, if any? (If none, please write  
28 N/A) \_\_\_\_\_

29  
30 **17. How well do you agree with the following statement?**

31 **a. Overall, the Digital Medicine System adds value to my practice.**

| Strongly Disagree | Disagree | Somewhat Disagree | Neutral | Somewhat Agree | Agree | Strongly Agree |
|-------------------|----------|-------------------|---------|----------------|-------|----------------|
| 1                 | 2        | 3                 | 4       | 5              | 6     | 7              |
|                   |          |                   |         |                |       |                |

38  
39 **18. Based on your overall experience with this patient, how would you rate your satisfaction with the**  
40 **Digital Medicine System?**

| Extremely Dissatisfied | Dissatisfied | Somewhat Dissatisfied | Neutral | Somewhat Satisfied | Satisfied | Extremely Satisfied |
|------------------------|--------------|-----------------------|---------|--------------------|-----------|---------------------|
| 1                      | 2            | 3                     | 4       | 5                  | 6         | 7                   |
|                        |              |                       |         |                    |           |                     |

1  
2  
3 **Supplemental Figure 3. Caregiver/Support Person Involvement Scale (Ver 2.0)**  
4  
5

6 **DMS Caregiver/Support Person Involvement Scale**  
7

- 8  
9  
10 **1. Are you aware that the study participant/patient is currently participating in the Digital**  
11 **Medicine study (check one)?**  
12

| Yes | No* |
|-----|-----|
|     |     |

13  
14  
15  
16  
17  
18 **\*If no, stop here and do not answer the rest of the questions on this form.**  
19

- 20  
21 **2. Indicate your relationship to the study participant/patient by placing a √ (check).**  
22

| Friend | Hired Caregiver | Relative* | Other** |
|--------|-----------------|-----------|---------|
|        |                 |           |         |

23  
24  
25  
26  
27  
28 **\*If you are a relative, please specify relationship to the study participant/patient, e.g.,**  
29 **wife, father:**  
30

31 **\*\*If you selected "Other", please specify your relationship to the study**  
32 **participant/patient:**  
33  
34  
35  
36  
37  
38  
39  
40  
41  
42  
43  
44  
45  
46  
47  
48  
49  
50  
51  
52  
53  
54  
55  
56  
57  
58  
59  
60

---

3. How much involvement did you provide the subject with regard to taking medication, pairing the patch, applying the patch, and using the app during the course of the study?

|                                                                                         | Never | Once a month or less | A few times a month | Once a week      | A few times a week | Daily              |
|-----------------------------------------------------------------------------------------|-------|----------------------|---------------------|------------------|--------------------|--------------------|
| How much overall assistance did you provide the subject during the course of the study? |       |                      |                     |                  |                    |                    |
| How much assistance did you provide with patch application?                             |       |                      |                     |                  |                    |                    |
| How much assistance did you provide with syncing the technology?                        |       |                      |                     |                  |                    |                    |
| How much assistance did you provide with using the app?                                 |       |                      |                     |                  |                    |                    |
|                                                                                         | Never | Once a week          | A few times a week  | Nearly every day | Daily              | More than once/day |
| How much overall assistance did you provide during the past week of the study?          |       |                      |                     |                  |                    |                    |

### Clinical Global Impression Scale

#### Clinical Global Impression – Severity Scale (CGI-S)

Considering your total clinical experience with this particular population, how mentally ill is the patient at this time?

0 = Not assessed

4 = Moderately ill

1 = Normal, not at all ill

5 = Markedly ill

2 = Borderline mentally ill

6 = Severely ill

3 = Mildly ill

7 = Among the most extremely ill subjects

#### Supplemental Figure 4. Personal and Social Performance Scale

Original version: Morosini PL, Magliano L, Brambilla L, et al. Development, reliability and acceptability of a new version of the DSM-IV Social and Occupational Functioning Assessment Scale (SOFAS) to assess routine social functioning. *Acta Psychiatr Scand* 2000;101(4):323-9  
Copyright © 2000 John Wiley & Sons, Inc. Reproduced with permission of Blackwell Publishing Ltd.

For peer review only

## Personal and Social Performance Scale (PSP)

The rating is based on four main areas: (a) socially useful activities, including work and study; (b) personal and social relationships; (c) self-care; and (d) disturbing and aggressive behaviors.

Data will be captured in the following format using the PSP descriptions provided below:

|                                                         | Absent                   | Mild                     | Manifest                 | Marked                   | Severe                   | Very Severe              |
|---------------------------------------------------------|--------------------------|--------------------------|--------------------------|--------------------------|--------------------------|--------------------------|
| a. Socially useful activities, including work and study | <input type="checkbox"/> |
| b. Personal and social relationships                    | <input type="checkbox"/> |
| c. Self-care                                            | <input type="checkbox"/> |
| d. Disturbing and aggressive behaviors                  | <input type="checkbox"/> |

The levels of functioning in other areas should be taken into account to adjust the rating inside the decimal level (for instance, from 31 to 40). Suicidal risk is not included in the scale.

| 10-point intervals | PSP descriptions                                                                                                                                                                                                                                             |
|--------------------|--------------------------------------------------------------------------------------------------------------------------------------------------------------------------------------------------------------------------------------------------------------|
| 100–91             | Excellent functioning in all four main areas*. He/she is held in high consideration for his/her good qualities, copes adequately with life problems, is involved in a wide range of interests and activities.                                                |
| 90–81              | Good functioning in all four main areas, presence of only common problems or difficulties.                                                                                                                                                                   |
| 80–71              | Mild difficulties in 1 or more of areas a–c.                                                                                                                                                                                                                 |
| 70–61              | Manifest, but not marked difficulties in 1 or more areas a–c, or mild difficulties in d.                                                                                                                                                                     |
| 60–51              | Marked difficulties in 1 of areas a–c, or manifest difficulties in d.                                                                                                                                                                                        |
| 50–41              | Marked difficulties in 2 or more, or severe difficulties in 1 of areas a–c, with or without manifest difficulties in d.                                                                                                                                      |
| 40–31              | Severe difficulties in 1 and marked difficulties in at least 1 of areas a–c, or marked difficulties in d.                                                                                                                                                    |
| 30–21              | Severe difficulties in 2 of areas a–c, or severe difficulties in d, with or without impairment in areas a–c.                                                                                                                                                 |
| 20–11              | Severe difficulties in all areas a–d, or very severe in d with or without impairment in general areas a–c. If the person reacts to external prompts the suggested scores are 20–16, if not, the suggested scores are 15–11.                                  |
| 10–1               | Lack of autonomy in basic functioning with extreme behaviors but without survival risk (ratings 6–10) or with survival risk, eg, death risk due to malnutrition, dehydration, infections, inability to recognize situation of manifest danger (ratings 5–1). |

**For main areas a–c, the degrees of severity are:**

|                          |                                                                                                                                                                                                                                                                                          |
|--------------------------|------------------------------------------------------------------------------------------------------------------------------------------------------------------------------------------------------------------------------------------------------------------------------------------|
| Absent                   |                                                                                                                                                                                                                                                                                          |
| Mild                     | Not manifest difficulties, known only to someone who is very familiar with the person.                                                                                                                                                                                                   |
| Manifest, but not marked | Difficulties clearly noticeable by everyone, but not interfering substantially with the person's ability to perform his/her role in that area, given the person's socio-cultural context, age, sex and educational levels.                                                               |
| Marked                   | Difficulties heavily interfering with role performance in that area; however, the person is still able to do something without professional or social help, although inadequately and/or occasionally; if helped by someone, he/she may be able reach the previous level of functioning. |
| Severe                   | Difficulties that make the person unable to perform any role in that area, if not professionally helped, or lead the person to a destructive role; however, there are no survival risks.                                                                                                 |
| Very severe              | Impairments and difficulties of such intensity to endanger person's survival.                                                                                                                                                                                                            |

**For general area d, the degrees of severity are:**

|                          |                                                                                                                                                                                |
|--------------------------|--------------------------------------------------------------------------------------------------------------------------------------------------------------------------------|
| Absent                   |                                                                                                                                                                                |
| Mild                     | Mild rudeness, unsociability or whingeing.                                                                                                                                     |
| Manifest, but not marked | Speaking too loudly or speaking to others in a too-familiar manner, or eating in a socially unacceptable manner.                                                               |
| Marked                   | Insulting other in public, breaking or wrecking objects, acting frequently in a socially inappropriate but not dangerous way (eg, stripping in public or urinating in public). |
| Severe                   | Frequent verbal threats or frequent physical assaults, without intention or possibility of severe injuries.                                                                    |
| Very severe              | Frequent aggressive acts, aimed at or likely to cause severe injuries.                                                                                                         |

Occasional is defined as occurring three or more times in the reference period or occurring even less than three times but in circumstances and/or with such a previous history to convince the rater that there is a risk of recurrence in the near future. If the aggressive behavior has been present occasionally, the rating may be decreased by one degree, eg, from severe to marked.

\* Main areas: a = socially useful activities, including work and study; b = personal and social relationships; c = self-care; d = disturbing and aggressive behaviors.

**Guidelines for PSP Total Score**

Ratings from 71–100 reflect only mild difficulties.

Ratings from 31–70 reflect manifest disabilities of various degrees.

Ratings from 1–30 reflect functioning so poor that intensive support or supervision is needed.



## Supplemental Figure 5. Patient Activation Measure-Mental Health Scale

The following questions ask about your feelings regarding your mental healthcare. When you think about mental health and mental health care, how much do you agree or disagree with the following statements? Please circle the answer that you most agree with:

1. When all is said and done, I am the person who is responsible for managing my mental health.

|                   |          |       |                |
|-------------------|----------|-------|----------------|
| 1                 | 2        | 3     | 4              |
| Strongly Disagree | Disagree | Agree | Strongly Agree |

2. Taking an active role in my own mental health is the most important factor in determining my mental health and ability to function.

|                   |          |       |                |
|-------------------|----------|-------|----------------|
| 1                 | 2        | 3     | 4              |
| Strongly Disagree | Disagree | Agree | Strongly Agree |

3. I am confident that I can take actions that will help prevent or minimize some symptoms or problems associated with my mental health condition.

|                   |          |       |                |
|-------------------|----------|-------|----------------|
| 1                 | 2        | 3     | 4              |
| Strongly Disagree | Disagree | Agree | Strongly Agree |

4. I know what each of my prescribed mental health medications does.

|                   |          |       |                |
|-------------------|----------|-------|----------------|
| 1                 | 2        | 3     | 4              |
| Strongly Disagree | Disagree | Agree | Strongly Agree |

5. I am confident that I can tell when I need to go get mental health care, and when I can handle a mental health problem myself.

|                   |          |       |                |
|-------------------|----------|-------|----------------|
| 1                 | 2        | 3     | 4              |
| Strongly Disagree | Disagree | Agree | Strongly Agree |

6. I am confident I can tell my mental health clinician about concerns I have, even when he or she does not ask.

|                   |          |       |                |
|-------------------|----------|-------|----------------|
| 1                 | 2        | 3     | 4              |
| Strongly Disagree | Disagree | Agree | Strongly Agree |

1  
2  
3  
4  
5 **7. I am confident that I can follow through on mental health treatments I need to do at home.**

6  
7                   1                                   2                                   3                                   4  
8  
9 Strongly Disagree                   Disagree                   Agree                   Strongly Agree

10  
11  
12 **8. I understand the nature and causes of my mental health condition(s).**

13  
14                   1                                   2                                   3                                   4  
15  
16 Strongly Disagree                   Disagree                   Agree                   Strongly Agree

17  
18  
19  
20 **9. I know the different treatment options available for my mental health condition(s).**

21  
22                   1                                   2                                   3                                   4  
23  
24 Strongly Disagree                   Disagree                   Agree                   Strongly Agree

25  
26  
27  
28 **10. I am able to maintain the lifestyle changes I have made for my mental health.**

29  
30                   1                                   2                                   3                                   4  
31  
32 Strongly Disagree                   Disagree                   Agree                   Strongly Agree

33  
34  
35 **11. I know how to prevent further mental health problems.**

36  
37                   1                                   2                                   3                                   4  
38  
39 Strongly Disagree                   Disagree                   Agree                   Strongly Agree

40  
41  
42  
43 **12. I am confident I can figure out solutions when new situations or problems arise with my mental health.**

44  
45                   1                                   2                                   3                                   4  
46  
47 Strongly Disagree                   Disagree                   Agree                   Strongly Agree

48  
49  
50  
51 **13. I am confident that I can maintain lifestyle changes, like diet and exercise, even during times of stress.**

52  
53                   1                                   2                                   3                                   4  
54  
55 Strongly Disagree                   Disagree                   Agree                   Strongly Agree

1  
2  
3 Supplemental Material – PRECIS-2 Tool Assessment  
4  
5

6 Whilst the PRECIS-2 tool assessment was not completed during the design of the study, when it  
7 is designed to be conducted, a post assessment use of the tool confirms the use of the term  
8 pragmatic. For example, from the nine PRECIS-2 domains:  
9  
10

11 Eligibility: Would score 4 (out of 5) since those identified in the study would be those identified  
12 in usual care. The study does exclude inpatients, which in the “real world” could in theory  
13 participate but we felt the DMS intervention was of limited benefit in this setting since inpatients  
14 have observed adherence  
15  
16

17 Recruitment: would score 4-5 since recruitment is based simply on screening patient caseloads  
18 and assessment of patients who may need help with adherence measures. No advertisements  
19 have been conducted.  
20  
21

22 Setting: Would score 4-5 since the care settings used in the study are those in usual care. We  
23 have a range of participants from community and specialist mental health services  
24  
25

26 Organisation: Would likely score 3-4 since although the resource/expertise is largely similar to  
27 usual care, the study does use NHS research staff to assist with training and screening, as is  
28 commonplace with all clinical studies in the UK  
29  
30

31 Flexibility (delivery): Would score 3-4 since the study gives patients and HCPs the ability to  
32 follow standard of care but does require specific site visit at w4 and w8 (yet one could argue this  
33 would occur naturally since the w4 visit is to collect a new prescription (which would occur in  
34  
35  
36  
37  
38  
39  
40  
41  
42  
43  
44  
45  
46  
47  
48  
49  
50  
51  
52  
53  
54  
55  
56  
57  
58  
59  
60

1  
2  
3 the real world) and the w8 visit is the completion of the study. Patients do not experience any  
4  
5 other “forced” visits.  
6  
7

8  
9 Flexibility (adherence): Would score 3 since following enrolment if patients do not utilise the  
10  
11 patch/app the site can contact the patient to found out why they are not engaging and try to  
12  
13 encourage; however, this would be the same if the DMS was indeed normal practice; this is the  
14  
15 intention of the tool to promote conversations between visits when individuals are not adherent.  
16  
17

18  
19 Primary outcome: would score 3-4; whilst the outcome may not be obvious to patients, the  
20  
21 outcome has been supported from conversations with HCPs and payers. The good patch  
22  
23 coverage days are essential to provide insight into medication taking so again, if the intervention  
24  
25 become standard, the metric would be used since it would determine whether objective and  
26  
27 insightful data was being captured.  
28  
29  
30

31  
32  
33  
34  
35 Primary analysis: Would score 4 since all individuals will be included in the analysis with all  
36  
37 available data.  
38  
39  
40  
41  
42  
43  
44

45 Based on the above, the average score is approx. 4 which equates to “Rather pragmatic”  
46  
47

48 The reason why the study is not the top score of 5 (Very pragmatic) is that the intervention itself  
49  
50 does cause changes to current care but we are not stating how individuals should respond to these  
51  
52 changes. They are free to decide for themselves.  
53  
54  
55  
56  
57  
58  
59  
60



SPIRIT 2013 Checklist: Recommended items to address in a clinical trial protocol and related documents\*

| Section/item                      | Item No | Description                                                                                                                                                                                                                                                                              | Addressed on page number              |
|-----------------------------------|---------|------------------------------------------------------------------------------------------------------------------------------------------------------------------------------------------------------------------------------------------------------------------------------------------|---------------------------------------|
| <b>Administrative information</b> |         |                                                                                                                                                                                                                                                                                          |                                       |
| Title                             | 1       | Descriptive title identifying the study design, population, interventions, and, if applicable, trial acronym                                                                                                                                                                             | <u>Page 1 Line 1</u>                  |
| Trial registration                | 2a      | Trial identifier and registry name. If not yet registered, name of intended registry                                                                                                                                                                                                     | <u>Page 4 Line 64</u>                 |
|                                   | 2b      | All items from the World Health Organization Trial Registration Data Set                                                                                                                                                                                                                 | Provided on <u>ClinicalTrials.gov</u> |
| Protocol version                  | 3       | Date and version identifier                                                                                                                                                                                                                                                              | <u>Page 1 of protocol</u>             |
| Funding                           | 4       | Sources and types of financial, material, and other support                                                                                                                                                                                                                              | <u>Page 20 Line 396</u>               |
| Roles and responsibilities        | 5a      | Names, affiliations, and roles of protocol contributors                                                                                                                                                                                                                                  | <u>Page 21 Line 408</u>               |
|                                   | 5b      | Name and contact information for the trial sponsor                                                                                                                                                                                                                                       | <u>Page 1 Line 22</u>                 |
|                                   | 5c      | Role of study sponsor and funders, if any, in study design; collection, management, analysis, and interpretation of data; writing of the report; and the decision to submit the report for publication, including whether they will have ultimate authority over any of these activities | <u>Page 21 Line 407</u>               |
|                                   | 5d      | Composition, roles, and responsibilities of the coordinating centre, steering committee, endpoint adjudication committee, data management team, and other individuals or groups overseeing the trial, if applicable (see Item 21a for data monitoring committee)                         | <u>Page 21 Line 407</u>               |

1 **Introduction**

2

3 Background and rationale 6a Description of research question and justification for undertaking the trial, including summary of relevant studies (published and unpublished) examining benefits and harms for each intervention Page 7 Line 137

4

5

6 6b Explanation for choice of comparators N/A

7

8 Objectives 7 Specific objectives or hypotheses Page 9 Line 163

9

10 Trial design 8 Description of trial design including type of trial (eg, parallel group, crossover, factorial, single group), allocation ratio, and framework (eg, superiority, equivalence, noninferiority, exploratory) Page 9 Line 170

11

12

13

14 **Methods: Participants, interventions, and outcomes**

15

16 Study setting 9 Description of study settings (eg, community clinic, academic hospital) and list of countries where data will be collected. Reference to where list of study sites can be obtained Page 9 Line 176

17

18

19 Eligibility criteria 10 Inclusion and exclusion criteria for participants. If applicable, eligibility criteria for study centres and individuals who will perform the interventions (eg, surgeons, psychotherapists) Page 10 Line 188

20

21

22 Interventions 11a Interventions for each group with sufficient detail to allow replication, including how and when they will be administered Page 11 Line 190

23

24

25 11b Criteria for discontinuing or modifying allocated interventions for a given trial participant (eg, drug dose change in response to harms, participant request, or improving/worsening disease) Page 18 Line 343

26

27

28 11c Strategies to improve adherence to intervention protocols, and any procedures for monitoring adherence (eg, drug tablet return, laboratory tests) Page 19 Line 358

29

30

31 11d Relevant concomitant care and interventions that are permitted or prohibited during the trial As listed on each drug label

32

33

34

35 Outcomes 12 Primary, secondary, and other outcomes, including the specific measurement variable (eg, systolic blood pressure), analysis metric (eg, change from baseline, final value, time to event), method of aggregation (eg, median, proportion), and time point for each outcome. Explanation of the clinical relevance of chosen efficacy and harm outcomes is strongly recommended Page 14 Line 265

36

37

38

39

40

41

42

43

44

45

46

|   |                      |    |                                                                                                                                                                                       |                         |
|---|----------------------|----|---------------------------------------------------------------------------------------------------------------------------------------------------------------------------------------|-------------------------|
| 1 | Participant timeline | 13 | Time schedule of enrolment, interventions (including any run-ins and washouts), assessments, and visits for participants. A schematic diagram is highly recommended (see Figure)      | <u>Figure 3</u>         |
| 2 |                      |    |                                                                                                                                                                                       |                         |
| 3 |                      |    |                                                                                                                                                                                       |                         |
| 4 | Sample size          | 14 | Estimated number of participants needed to achieve study objectives and how it was determined, including clinical and statistical assumptions supporting any sample size calculations | <u>Page 15 Line 282</u> |
| 5 |                      |    |                                                                                                                                                                                       |                         |
| 6 |                      |    |                                                                                                                                                                                       |                         |
| 7 | Recruitment          | 15 | Strategies for achieving adequate participant enrolment to reach target sample size                                                                                                   | <u>Page 13 Line 249</u> |
| 8 |                      |    |                                                                                                                                                                                       |                         |

### Methods: Assignment of interventions (for controlled trials)

#### Allocation:

|    |                                  |     |                                                                                                                                                                                                                                                                                                                                                          |            |
|----|----------------------------------|-----|----------------------------------------------------------------------------------------------------------------------------------------------------------------------------------------------------------------------------------------------------------------------------------------------------------------------------------------------------------|------------|
| 13 | Sequence generation              | 16a | Method of generating the allocation sequence (eg, computer-generated random numbers), and list of any factors for stratification. To reduce predictability of a random sequence, details of any planned restriction (eg, blocking) should be provided in a separate document that is unavailable to those who enrol participants or assign interventions | <u>N/A</u> |
| 14 |                                  |     |                                                                                                                                                                                                                                                                                                                                                          |            |
| 15 |                                  |     |                                                                                                                                                                                                                                                                                                                                                          |            |
| 16 |                                  |     |                                                                                                                                                                                                                                                                                                                                                          |            |
| 17 |                                  |     |                                                                                                                                                                                                                                                                                                                                                          |            |
| 18 |                                  |     |                                                                                                                                                                                                                                                                                                                                                          |            |
| 19 | Allocation concealment mechanism | 16b | Mechanism of implementing the allocation sequence (eg, central telephone; sequentially numbered, opaque, sealed envelopes), describing any steps to conceal the sequence until interventions are assigned                                                                                                                                                | <u>N/A</u> |
| 20 |                                  |     |                                                                                                                                                                                                                                                                                                                                                          |            |
| 21 |                                  |     |                                                                                                                                                                                                                                                                                                                                                          |            |
| 22 |                                  |     |                                                                                                                                                                                                                                                                                                                                                          |            |
| 23 |                                  |     |                                                                                                                                                                                                                                                                                                                                                          |            |
| 24 | Implementation                   | 16c | Who will generate the allocation sequence, who will enrol participants, and who will assign participants to interventions                                                                                                                                                                                                                                | <u>N/A</u> |
| 25 |                                  |     |                                                                                                                                                                                                                                                                                                                                                          |            |
| 26 |                                  |     |                                                                                                                                                                                                                                                                                                                                                          |            |
| 27 | Blinding (masking)               | 17a | Who will be blinded after assignment to interventions (eg, trial participants, care providers, outcome assessors, data analysts), and how                                                                                                                                                                                                                | <u>N/A</u> |
| 28 |                                  |     |                                                                                                                                                                                                                                                                                                                                                          |            |
| 29 |                                  |     |                                                                                                                                                                                                                                                                                                                                                          |            |
| 30 |                                  | 17b | If blinded, circumstances under which unblinding is permissible, and procedure for revealing a participant's allocated intervention during the trial                                                                                                                                                                                                     | <u>N/A</u> |
| 31 |                                  |     |                                                                                                                                                                                                                                                                                                                                                          |            |
| 32 |                                  |     |                                                                                                                                                                                                                                                                                                                                                          |            |

### Methods: Data collection, management, and analysis

|    |                         |     |                                                                                                                                                                                                                                                                                                                                                                                                              |                         |
|----|-------------------------|-----|--------------------------------------------------------------------------------------------------------------------------------------------------------------------------------------------------------------------------------------------------------------------------------------------------------------------------------------------------------------------------------------------------------------|-------------------------|
| 36 | Data collection methods | 18a | Plans for assessment and collection of outcome, baseline, and other trial data, including any related processes to promote data quality (eg, duplicate measurements, training of assessors) and a description of study instruments (eg, questionnaires, laboratory tests) along with their reliability and validity, if known. Reference to where data collection forms can be found, if not in the protocol | <u>Protocol Page 81</u> |
| 37 |                         |     |                                                                                                                                                                                                                                                                                                                                                                                                              |                         |
| 38 |                         |     |                                                                                                                                                                                                                                                                                                                                                                                                              |                         |
| 39 |                         |     |                                                                                                                                                                                                                                                                                                                                                                                                              |                         |
| 40 |                         |     |                                                                                                                                                                                                                                                                                                                                                                                                              |                         |
| 41 |                         |     |                                                                                                                                                                                                                                                                                                                                                                                                              |                         |
| 42 |                         |     |                                                                                                                                                                                                                                                                                                                                                                                                              |                         |

|    |                                 |     |                                                                                                                                                                                                                                                                                                                                       |                                                                     |
|----|---------------------------------|-----|---------------------------------------------------------------------------------------------------------------------------------------------------------------------------------------------------------------------------------------------------------------------------------------------------------------------------------------|---------------------------------------------------------------------|
| 1  |                                 | 18b | Plans to promote participant retention and complete follow-up, including list of any outcome data to be collected for participants who discontinue or deviate from intervention protocols                                                                                                                                             | <u>Page 14 Line 259</u>                                             |
| 2  |                                 |     |                                                                                                                                                                                                                                                                                                                                       |                                                                     |
| 3  |                                 |     |                                                                                                                                                                                                                                                                                                                                       |                                                                     |
| 4  | Data management                 | 19  | Plans for data entry, coding, security, and storage, including any related processes to promote data quality (eg, double data entry; range checks for data values). Reference to where details of data management procedures can be found, if not in the protocol                                                                     | <u>Protocol Page 73</u>                                             |
| 5  |                                 |     |                                                                                                                                                                                                                                                                                                                                       |                                                                     |
| 6  |                                 |     |                                                                                                                                                                                                                                                                                                                                       |                                                                     |
| 7  |                                 |     |                                                                                                                                                                                                                                                                                                                                       |                                                                     |
| 8  | Statistical methods             | 20a | Statistical methods for analysing primary and secondary outcomes. Reference to where other details of the statistical analysis plan can be found, if not in the protocol                                                                                                                                                              | <u>Protocol Page 73</u>                                             |
| 9  |                                 |     |                                                                                                                                                                                                                                                                                                                                       |                                                                     |
| 10 |                                 |     |                                                                                                                                                                                                                                                                                                                                       |                                                                     |
| 11 |                                 | 20b | Methods for any additional analyses (eg, subgroup and adjusted analyses)                                                                                                                                                                                                                                                              | <u>Page 15 Line 282</u>                                             |
| 12 |                                 |     |                                                                                                                                                                                                                                                                                                                                       |                                                                     |
| 13 |                                 | 20c | Definition of analysis population relating to protocol non-adherence (eg, as randomised analysis), and any statistical methods to handle missing data (eg, multiple imputation)                                                                                                                                                       | <u>Page 15 Line 282</u>                                             |
| 14 |                                 |     |                                                                                                                                                                                                                                                                                                                                       |                                                                     |
| 15 |                                 |     |                                                                                                                                                                                                                                                                                                                                       |                                                                     |
| 16 |                                 |     |                                                                                                                                                                                                                                                                                                                                       |                                                                     |
| 17 | <b>Methods: Monitoring</b>      |     |                                                                                                                                                                                                                                                                                                                                       |                                                                     |
| 18 |                                 |     |                                                                                                                                                                                                                                                                                                                                       |                                                                     |
| 19 | Data monitoring                 | 21a | Composition of data monitoring committee (DMC); summary of its role and reporting structure; statement of whether it is independent from the sponsor and competing interests; and reference to where further details about its charter can be found, if not in the protocol. Alternatively, an explanation of why a DMC is not needed | <u>N/A Pragmatic Trial - Safety of Interventions is Established</u> |
| 20 |                                 |     |                                                                                                                                                                                                                                                                                                                                       |                                                                     |
| 21 |                                 |     |                                                                                                                                                                                                                                                                                                                                       |                                                                     |
| 22 |                                 |     |                                                                                                                                                                                                                                                                                                                                       |                                                                     |
| 23 |                                 |     |                                                                                                                                                                                                                                                                                                                                       |                                                                     |
| 24 |                                 |     |                                                                                                                                                                                                                                                                                                                                       |                                                                     |
| 25 |                                 | 21b | Description of any interim analyses and stopping guidelines, including who will have access to these interim results and make the final decision to terminate the trial                                                                                                                                                               | <u>N/A</u>                                                          |
| 26 |                                 |     |                                                                                                                                                                                                                                                                                                                                       |                                                                     |
| 27 |                                 |     |                                                                                                                                                                                                                                                                                                                                       |                                                                     |
| 28 | Harms                           | 22  | Plans for collecting, assessing, reporting, and managing solicited and spontaneously reported adverse events and other unintended effects of trial interventions or trial conduct                                                                                                                                                     | <u>Protocol Page 66</u>                                             |
| 29 |                                 |     |                                                                                                                                                                                                                                                                                                                                       |                                                                     |
| 30 |                                 |     |                                                                                                                                                                                                                                                                                                                                       |                                                                     |
| 31 | Auditing                        | 23  | Frequency and procedures for auditing trial conduct, if any, and whether the process will be independent from investigators and the sponsor                                                                                                                                                                                           | <u>Protocol Page 81</u>                                             |
| 32 |                                 |     |                                                                                                                                                                                                                                                                                                                                       |                                                                     |
| 33 |                                 |     |                                                                                                                                                                                                                                                                                                                                       |                                                                     |
| 34 |                                 |     |                                                                                                                                                                                                                                                                                                                                       |                                                                     |
| 35 | <b>Ethics and dissemination</b> |     |                                                                                                                                                                                                                                                                                                                                       |                                                                     |
| 36 |                                 |     |                                                                                                                                                                                                                                                                                                                                       |                                                                     |
| 37 | Research ethics approval        | 24  | Plans for seeking research ethics committee/institutional review board (REC/IRB) approval                                                                                                                                                                                                                                             | <u>Page 16 Line 309</u>                                             |
| 38 |                                 |     |                                                                                                                                                                                                                                                                                                                                       |                                                                     |
| 39 |                                 |     |                                                                                                                                                                                                                                                                                                                                       |                                                                     |
| 40 |                                 |     |                                                                                                                                                                                                                                                                                                                                       |                                                                     |
| 41 |                                 |     |                                                                                                                                                                                                                                                                                                                                       |                                                                     |
| 42 |                                 |     |                                                                                                                                                                                                                                                                                                                                       |                                                                     |
| 43 |                                 |     |                                                                                                                                                                                                                                                                                                                                       |                                                                     |
| 44 |                                 |     |                                                                                                                                                                                                                                                                                                                                       |                                                                     |
| 45 |                                 |     |                                                                                                                                                                                                                                                                                                                                       |                                                                     |
| 46 |                                 |     |                                                                                                                                                                                                                                                                                                                                       |                                                                     |



|    |                               |     |                                                                                                                                                                                                                                                                                     |                                               |
|----|-------------------------------|-----|-------------------------------------------------------------------------------------------------------------------------------------------------------------------------------------------------------------------------------------------------------------------------------------|-----------------------------------------------|
| 1  | Protocol amendments           | 25  | Plans for communicating important protocol modifications (eg, changes to eligibility criteria, outcomes, analyses) to relevant parties (eg, investigators, REC/IRBs, trial participants, trial registries, journals, regulators)                                                    | <a href="#">Updates to ClinicalTrials.gov</a> |
| 5  | Consent or assent             | 26a | Who will obtain informed consent or assent from potential trial participants or authorised surrogates, and how (see Item 32)                                                                                                                                                        | <a href="#">Page 15 Line 293</a>              |
| 8  |                               | 26b | Additional consent provisions for collection and use of participant data and biological specimens in ancillary studies, if applicable                                                                                                                                               | <a href="#">N/A</a>                           |
| 11 | Confidentiality               | 27  | How personal information about potential and enrolled participants will be collected, shared, and maintained in order to protect confidentiality before, during, and after the trial                                                                                                | <a href="#">Page 15 Line 299</a>              |
| 15 | Declaration of interests      | 28  | Financial and other competing interests for principal investigators for the overall trial and each study site                                                                                                                                                                       | <a href="#">Page 21 Line 402</a>              |
| 18 | Access to data                | 29  | Statement of who will have access to the final trial dataset, and disclosure of contractual agreements that limit such access for investigators                                                                                                                                     | <a href="#">Page 17 Line 318</a>              |
| 21 | Ancillary and post-trial care | 30  | Provisions, if any, for ancillary and post-trial care, and for compensation to those who suffer harm from trial participation                                                                                                                                                       | <a href="#">N/A</a>                           |
| 24 | Dissemination policy          | 31a | Plans for investigators and sponsor to communicate trial results to participants, healthcare professionals, the public, and other relevant groups (eg, via publication, reporting in results databases, or other data sharing arrangements), including any publication restrictions | <a href="#">Protocol page 84</a>              |
| 29 |                               | 31b | Authorship eligibility guidelines and any intended use of professional writers                                                                                                                                                                                                      | <a href="#">Protocol page 84</a>              |
| 31 |                               | 31c | Plans, if any, for granting public access to the full protocol, participant-level dataset, and statistical code                                                                                                                                                                     | <a href="#">Not yet determined</a>            |
| 33 | <b>Appendices</b>             |     |                                                                                                                                                                                                                                                                                     |                                               |
| 35 | Informed consent materials    | 32  | Model consent form and other related documentation given to participants and authorised surrogates                                                                                                                                                                                  | <a href="#">Protocol Page 107</a>             |
| 38 | Biological specimens          | 33  | Plans for collection, laboratory evaluation, and storage of biological specimens for genetic or molecular analysis in the current trial and for future use in ancillary studies, if applicable                                                                                      | <a href="#">N/A</a>                           |

1  
2  
3  
4  
5  
6  
7  
8  
9  
10  
11  
12  
13  
14  
15  
16  
17  
18  
19  
20  
21  
22  
23  
24  
25  
26  
27  
28  
29  
30  
31  
32  
33  
34  
35  
36  
37  
38  
39  
40  
41  
42  
43  
44  
45  
46

\*It is strongly recommended that this checklist be read in conjunction with the SPIRIT 2013 Explanation & Elaboration for important clarification on the items. Amendments to the protocol should be tracked and dated. The SPIRIT checklist is copyrighted by the SPIRIT Group under the Creative Commons [“Attribution-NonCommercial-NoDerivs 3.0 Unported”](#) license.

For peer review only
