# Supplementary material for: Hummingbird Study: a study protocol for a multicentre exploratory trial to assess the acceptance and performance of a digital medicine system in adults with schizophrenia, schizoaffective disorder or first-episode psychosis
Source: PubMed Central journal article supplement — BMJ Open. 2019 Jun 27;9(6):e025952. doi: 10.1136/bmjopen-2018-025952 (PMC6609081; doi:10.1136/bmjopen-2018-025952), 2019-06-27
Supplement: bmjopen-2018-025952supp001.pdf [file bmjopen-2018-025952supp001.pdf]

## Supplementary Material

**Supplemental Figure 1. Subject Usability and Satisfaction Scale (Ver 2.0)**

**Section A: Usability**

**1. How easy or difficult was it for you to apply the patch on your body?**

| Extremely Difficult | Difficult | Somewhat Difficult | Neutral | Somewhat Easy | Easy | Extremely Easy |
|---------------------|-----------|--------------------|---------|---------------|------|----------------|
| 1                   | 2         | 3                  | 4       | 5             | 6    | 7              |
|                     |           |                    |         |               |      |                |

**2. How easy or difficult was it to pair the patch with the mobile phone application (app)?**

| Extremely Difficult | Difficult | Somewhat Difficult | Neutral | Somewhat Easy | Easy | Extremely Easy |
|---------------------|-----------|--------------------|---------|---------------|------|----------------|
| 1                   | 2         | 3                  | 4       | 5             | 6    | 7              |
|                     |           |                    |         |               |      |                |

**3. How easy or difficult was it for you to use the mobile phone application (app)?**

| Extremely Difficult | Difficult | Somewhat Difficult | Neutral | Somewhat Easy | Easy | Extremely Easy |
|---------------------|-----------|--------------------|---------|---------------|------|----------------|
| 1                   | 2         | 3                  | 4       | 5             | 6    | 7              |
|                     |           |                    |         |               |      |                |

**4. How easy or difficult was it for you to use the Digital Medicine System?**

| Extremely Difficult | Difficult | Somewhat Difficult | Neutral | Somewhat Easy | Easy | Extremely Easy |
|---------------------|-----------|--------------------|---------|---------------|------|----------------|
| 1                   | 2         | 3                  | 4       | 5             | 6    | 7              |
|                     |           |                    |         |               |      |                |

**5. How well do you agree with the following statement?**

- In general, I did not mind wearing the patch.

| Strongly Disagree | Disagree | Somewhat Disagree | Neutral | Somewhat Agree | Agree | Strongly Agree |
|-------------------|----------|-------------------|---------|----------------|-------|----------------|
| 1                 | 2        | 3                 | 4       | 5              | 6     | 7              |

|  |  |  |  |  |  |  |
|--|--|--|--|--|--|--|
|  |  |  |  |  |  |  |
|--|--|--|--|--|--|--|

**6. Since your last visit, did you receive assistance when changing and pairing the required patches? Yes No**

If yes,

|                                                                  | Never | Once a month or less | A few times a month | Once a week | A few times a week | Daily |
|------------------------------------------------------------------|-------|----------------------|---------------------|-------------|--------------------|-------|
| How much assistance did you receive when applying the patches?   |       |                      |                     |             |                    |       |
| How much assistance did you receive when syncing the technology? |       |                      |                     |             |                    |       |

If you did receive any help or assistance, who helped or assisted you?  
(please place a √ [check] to indicate who helped or assisted you)

| Friend | Hired Caregiver | Relative* | Other** |
|--------|-----------------|-----------|---------|
|        |                 |           |         |

\*If a relative helped or assisted you, then please specify their relationship to you (such as wife, husband, father, mother, sister, brother, or whatever else you think is the most appropriate description of the relative who helped you): \_\_\_\_\_

\*\*If you selected "Other", please specify your relationship to the person who helped you  
\_\_\_\_\_

**Section B: Satisfaction**

**7. How easy or difficult was it for you to use the entire Digital Medicine System, which includes the patch, pills, and mobile phone application (app)?**

| Extremely Difficult | Difficult | Somewhat Difficult | Neutral | Somewhat Easy | Easy | Extremely Easy |
|---------------------|-----------|--------------------|---------|---------------|------|----------------|
| 1                   | 2         | 3                  | 4       | 5             | 6    | 7              |
|                     |           |                    |         |               |      |                |

**8. How helpful or unhelpful was the Digital Medicine System in the management of your condition?**

| Extremely Unhelpful | Unhelpful | Somewhat Unhelpful | Neutral | Somewhat Helpful | Helpful | Extremely Helpful |
|---------------------|-----------|--------------------|---------|------------------|---------|-------------------|
| 1                   | 2         | 3                  | 4       | 5                | 6       | 7                 |
|                     |           |                    |         |                  |         |                   |

**9. How helpful or unhelpful was the Digital Medicine System for sharing information with your healthcare professionals to help you understand your treatment plan?**

| Extremely Unhelpful | Unhelpful | Somewhat Unhelpful | Neutral | Somewhat Helpful | Helpful | Extremely Helpful |
|---------------------|-----------|--------------------|---------|------------------|---------|-------------------|
| 1                   | 2         | 3                  | 4       | 5                | 6       | 7                 |
|                     |           |                    |         |                  |         |                   |

**10. How helpful or unhelpful was the Digital Medicine System in improving your discussions with your doctor / treatment team?**

| Extremely Unhelpful | Unhelpful | Somewhat Unhelpful | Neutral | Somewhat Helpful | Helpful | Extremely Helpful |
|---------------------|-----------|--------------------|---------|------------------|---------|-------------------|
| 1                   | 2         | 3                  | 4       | 5                | 6       | 7                 |
|                     |           |                    |         |                  |         |                   |

**11. Based on your experience, how would you rate your satisfaction with the Digital Medicine System?**

| Extremely Dissatisfied | Dissatisfied | Somewhat Dissatisfied | Neutral | Somewhat Satisfied | Satisfied | Extremely Satisfied |
|------------------------|--------------|-----------------------|---------|--------------------|-----------|---------------------|
| 1                      | 2            | 3                     | 4       | 5                  | 6         | 7                   |
|                        |              |                       |         |                    |           |                     |

**12. How likely would you be to use the Digital Medicine System in the future, if it were available and recommended by your doctor?**

| Extremely Unlikely | Unlikely | Somewhat Unlikely | Neutral | Somewhat Likely | Likely | Extremely Likely |
|--------------------|----------|-------------------|---------|-----------------|--------|------------------|
| 1                  | 2        | 3                 | 4       | 5               | 6      | 7                |
|                    |          |                   |         |                 |        |                  |

**Supplemental Figure 2. Physician Utility Survey (Ver 2.0)**

*We ask the Principal Investigator, Physician Investigator, and Trial Coordinator(s) at a clinical site/trust to complete this survey for each patient enrolled. Please answer the below questions based on your overall experience using DMS.*

**1. How easy or difficult was it for you and your patient to apply the patch on the patient’s body?**

|                  | Extremel<br>y Difficult | Difficult | Somewhat<br>Difficult | Neutral | Somewhat<br>Easy | Easy | Extremely<br>Easy |
|------------------|-------------------------|-----------|-----------------------|---------|------------------|------|-------------------|
|                  | 1                       | 2         | 3                     | 4       | 5                | 6    | 7                 |
| For you          |                         |           |                       |         |                  |      |                   |
| For your patient |                         |           |                       |         |                  |      |                   |

**2. How easy or difficult was it for you and your patient to sync the patch with the mobile phone application (app)?**

|                  | Extremel<br>y Difficult | Difficult | Somewhat<br>Difficult | Neutral | Somewhat<br>Easy | Easy | Extremely<br>Easy |
|------------------|-------------------------|-----------|-----------------------|---------|------------------|------|-------------------|
|                  | 1                       | 2         | 3                     | 4       | 5                | 6    | 7                 |
| For you          |                         |           |                       |         |                  |      |                   |
| For your patient |                         |           |                       |         |                  |      |                   |

**3. How easy or difficult was it for you and your patient to complete the overall onboarding for the Digital Medicine System?**

|                  | Extremel<br>y Difficult | Difficult | Somewhat<br>Difficult | Neutral | Somewhat<br>Easy | Easy | Extremely<br>Easy |
|------------------|-------------------------|-----------|-----------------------|---------|------------------|------|-------------------|
|                  | 1                       | 2         | 3                     | 4       | 5                | 6    | 7                 |
| For you          |                         |           |                       |         |                  |      |                   |
| For your patient |                         |           |                       |         |                  |      |                   |

**4. Overall, how easy or difficult was it for you and your patient to use the mobile phone application (app)?**

|                  | Extremel<br>y Difficult | Difficult | Somewhat<br>Difficult | Neutral | Somewhat<br>Easy | Easy | Extremely<br>Easy |
|------------------|-------------------------|-----------|-----------------------|---------|------------------|------|-------------------|
|                  | 1                       | 2         | 3                     | 4       | 5                | 6    | 7                 |
| For you          |                         |           |                       |         |                  |      |                   |
| For your patient |                         |           |                       |         |                  |      |                   |

**5. Overall, how easy or difficult was it for you and your patient to use the entire Digital Medicine System, which includes the patch, pills, and mobile phone application (app)?**

|                  | Extremel<br>y Difficult | Difficult | Somewhat<br>Difficult | Neutral | Somewhat<br>Easy | Easy | Extremel<br>y Easy |
|------------------|-------------------------|-----------|-----------------------|---------|------------------|------|--------------------|
|                  | 1                       | 2         | 3                     | 4       | 5                | 6    | 7                  |
| For you          |                         |           |                       |         |                  |      |                    |
| For your patient |                         |           |                       |         |                  |      |                    |

**6. How easy or difficult was it for you to use the HCP dashboard?**

| Extremely Difficult | Difficult | Somewhat Difficult | Neutral | Somewhat Easy | Easy | Extremely Easy |
|---------------------|-----------|--------------------|---------|---------------|------|----------------|
| 1                   | 2         | 3                  | 4       | 5             | 6    | 7              |
|                     |           |                    |         |               |      |                |

7. If you were in routine clinical practice (ie, in clinical practice without a study protocol), how helpful or unhelpful do you think the Digital Medicine System could be for the following elements of clinical management for this specific patient?

|                                 | Extremely Unhelpful | Unhelpful | Somewhat Unhelpful | Neutral | Somewhat Helpful | Helpful | Extremely Helpful |
|---------------------------------|---------------------|-----------|--------------------|---------|------------------|---------|-------------------|
|                                 | 1                   | 2         | 3                  | 4       | 5                | 6       | 7                 |
| Assessment                      |                     |           |                    |         |                  |         |                   |
| Clinical Advice/Recommendations |                     |           |                    |         |                  |         |                   |
| Treatment Decisions             |                     |           |                    |         |                  |         |                   |

8. How effective was the Digital Medicine System in aiding decision-making for medication adherence?

| Extremely Not Effective | Not Effective to Use | Somewhat Not Effective to Use | Neutral | Somewhat Effective to Use | Effective to Use | Extremely Effective to Use |
|-------------------------|----------------------|-------------------------------|---------|---------------------------|------------------|----------------------------|
| 1                       | 2                    | 3                             | 4       | 5                         | 6                | 7                          |
|                         |                      |                               |         |                           |                  |                            |

9. How helpful or unhelpful was the Digital Medicine System in providing a way to better engage your patients in self-management of their condition?

| Extremely Unhelpful | Unhelpful | Somewhat Unhelpful | Neutral | Somewhat Helpful | Helpful | Extremely Helpful |
|---------------------|-----------|--------------------|---------|------------------|---------|-------------------|
| 1                   | 2         | 3                  | 4       | 5                | 6       | 7                 |
|                     |           |                    |         |                  |         |                   |

10. How helpful or unhelpful was the Digital Medicine System in improving quality of care for your patient?

| Extremely Unhelpful | Unhelpful | Somewhat Unhelpful | Neutral | Somewhat Helpful | Helpful | Extremely Helpful |
|---------------------|-----------|--------------------|---------|------------------|---------|-------------------|
| 1                   | 2         | 3                  | 4       | 5                | 6       | 7                 |
|                     |           |                    |         |                  |         |                   |

**11. How helpful or unhelpful was the Digital Medicine System in improving your conversations with your patient about their treatment plan and progress?**

| Extremely Unhelpful | Unhelpful | Somewhat Unhelpful | Neutral | Somewhat Helpful | Helpful | Extremely Helpful |
|---------------------|-----------|--------------------|---------|------------------|---------|-------------------|
| 1                   | 2         | 3                  | 4       | 5                | 6       | 7                 |
|                     |           |                    |         |                  |         |                   |

**12. How helpful or unhelpful was the Digital Medicine System in the identification of potential lifestyle changes for your patient (eg sleep and exercise)?**

| Extremely Unhelpful | Unhelpful | Somewhat Unhelpful | Neutral | Somewhat Helpful | Helpful | Extremely Helpful |
|---------------------|-----------|--------------------|---------|------------------|---------|-------------------|
| 1                   | 2         | 3                  | 4       | 5                | 6       | 7                 |
|                     |           |                    |         |                  |         |                   |

**13. Other than during the patient visit(s), did you look at the HCP dashboard at other times? Please select all that apply**

|                                            | Place a $\checkmark$ (check) next to the time you referred to the HCP dashboard |
|--------------------------------------------|---------------------------------------------------------------------------------|
| No, only during the patient visit          |                                                                                 |
| Prior to patient visit (same day as visit) |                                                                                 |
| In between visits                          |                                                                                 |
| Other: <i>Please Specify:</i> _____        |                                                                                 |

**14. What features did you find helpful? Please select all that apply**

|                                               | Place a $\checkmark$ (check) next to the features you found helpful | For the features you have selected, please rank these features from 1 (most helpful) to 7 (least helpful) in order of helpfulness |
|-----------------------------------------------|---------------------------------------------------------------------|-----------------------------------------------------------------------------------------------------------------------------------|
| Pill ingestion data                           |                                                                     |                                                                                                                                   |
| Patient reported reason code for missed doses |                                                                     |                                                                                                                                   |
| Multiple dose alerts                          |                                                                     |                                                                                                                                   |
| Missed dose alerts                            |                                                                     |                                                                                                                                   |
| Activity                                      |                                                                     |                                                                                                                                   |
| Rest                                          |                                                                     |                                                                                                                                   |
| Patient reported rest quality rating          |                                                                     |                                                                                                                                   |
| Other: <i>Please Specify:</i><br>_____        |                                                                     |                                                                                                                                   |

**15. Did you set up alerts to be notified of missed doses? Yes/no**

**a. If yes, based on your overall experience, how helpful were the missed dose alerts?**

| Extremely Unhelpful | Unhelpful | Somewhat Unhelpful | Neutral | Somewhat Helpful | Helpful | Extremely Helpful | Not Applicable – No alerts received |
|---------------------|-----------|--------------------|---------|------------------|---------|-------------------|-------------------------------------|
| 1                   | 2         | 3                  | 4       | 5                | 6       | 7                 |                                     |
|                     |           |                    |         |                  |         |                   |                                     |

15a. If you received a missed dose alert what action did you take, if any? (If none, please write N/A) \_\_\_\_\_

**16. Did you set up alerts to be notified of multiple doses? Yes/no**

**a. If yes, based on your overall experience, how helpful were the multiple dose alerts?**

| Extremely Unhelpful | Unhelpful | Somewhat Unhelpful | Neutral | Somewhat Helpful | Helpful | Extremely Helpful | Not Applicable – No alerts received |
|---------------------|-----------|--------------------|---------|------------------|---------|-------------------|-------------------------------------|
| 1                   | 2         | 3                  | 4       | 5                | 6       | 7                 |                                     |
|                     |           |                    |         |                  |         |                   |                                     |

16a. If you received a multiple dose alert what action did you take, if any? (If none, please write N/A) \_\_\_\_\_

**17. How well do you agree with the following statement?**

**a. Overall, the Digital Medicine System adds value to my practice.**

| Strongly Disagree | Disagree | Somewhat Disagree | Neutral | Somewhat Agree | Agree | Strongly Agree |
|-------------------|----------|-------------------|---------|----------------|-------|----------------|
| 1                 | 2        | 3                 | 4       | 5              | 6     | 7              |
|                   |          |                   |         |                |       |                |

**18. Based on your overall experience with this patient, how would you rate your satisfaction with the Digital Medicine System?**

| Extremely Dissatisfied | Dissatisfied | Somewhat Dissatisfied | Neutral | Somewhat Satisfied | Satisfied | Extremely Satisfied |
|------------------------|--------------|-----------------------|---------|--------------------|-----------|---------------------|
| 1                      | 2            | 3                     | 4       | 5                  | 6         | 7                   |
|                        |              |                       |         |                    |           |                     |

### Supplemental Figure 3. Caregiver/Support Person Involvement Scale (Ver 2.0)

#### DMS Caregiver/Support Person Involvement Scale

1. Are you aware that the study participant/patient is currently participating in the Digital Medicine study (check one)?

| Yes | No* |
|-----|-----|
|     |     |

\*If no, stop here and do not answer the rest of the questions on this form.

2. Indicate your relationship to the study participant/patient by placing a  $\checkmark$  (check).

| Friend | Hired Caregiver | Relative* | Other** |
|--------|-----------------|-----------|---------|
|        |                 |           |         |

\*If you are a relative, please specify relationship to the study participant/patient, e.g., wife, father:

\*\*If you selected "Other", please specify your relationship to the study participant/patient:

---



**3. How much involvement did you provide the subject with regard to taking medication, pairing the patch, applying the patch, and using the app during the course of the study?**

|                                                                                         | Never | Once a month or less | A few times a month | Once a week      | A few times a week | Daily              |
|-----------------------------------------------------------------------------------------|-------|----------------------|---------------------|------------------|--------------------|--------------------|
| How much overall assistance did you provide the subject during the course of the study? |       |                      |                     |                  |                    |                    |
| How much assistance did you provide with patch application?                             |       |                      |                     |                  |                    |                    |
| How much assistance did you provide with syncing the technology?                        |       |                      |                     |                  |                    |                    |
| How much assistance did you provide with using the app?                                 |       |                      |                     |                  |                    |                    |
|                                                                                         | Never | Once a week          | A few times a week  | Nearly every day | Daily              | More than once/day |
| How much overall assistance did you provide during the past week of the study?          |       |                      |                     |                  |                    |                    |

**Clinical Global Impression Scale**

Clinical Global Impression – Severity Scale (CGI-S)

Considering your total clinical experience with this particular population, how mentally ill is the patient at this time?

0 = Not assessed

4 = Moderately ill

1 = Normal, not at all ill

5 = Markedly ill

2 = Borderline mentally ill

6 = Severely ill

3 = Mildly ill

7 = Among the most extremely ill subjects

#### **Supplemental Figure 4. Personal and Social Performance Scale**

Original version: Morosini PL, Magliano L, Brambilla L, et al. Development, reliability and acceptability of a new version of the DSM-IV Social and Occupational Functioning Assessment Scale (SOFAS) to assess routine social functioning. *Acta Psychiatr Scand* 2000;101(4):323-9  
Copyright © 2000 John Wiley & Sons, Inc. Reproduced with permission of Blackwell Publishing Ltd.

## Personal and Social Performance Scale (PSP)

The rating is based on four main areas: (a) socially useful activities, including work and study; (b) personal and social relationships; (c) self-care; and (d) disturbing and aggressive behaviors.

Data will be captured in the following format using the PSP descriptions provided below:

|                                                         | Absent                   | Mild                     | Manifest                 | Marked                   | Severe                   | Very Severe              |
|---------------------------------------------------------|--------------------------|--------------------------|--------------------------|--------------------------|--------------------------|--------------------------|
| a. Socially useful activities, including work and study | <input type="checkbox"/> |
| b. Personal and social relationships                    | <input type="checkbox"/> |
| c. Self-care                                            | <input type="checkbox"/> |
| d. Disturbing and aggressive behaviors                  | <input type="checkbox"/> |

The levels of functioning in other areas should be taken into account to adjust the rating inside the decimal level (for instance, from 31 to 40). Suicidal risk is not included in the scale.

| 10-point intervals | PSP descriptions                                                                                                                                                                                                                                             |
|--------------------|--------------------------------------------------------------------------------------------------------------------------------------------------------------------------------------------------------------------------------------------------------------|
| 100–91             | Excellent functioning in all four main areas*. He/she is held in high consideration for his/her good qualities, copes adequately with life problems, is involved in a wide range of interests and activities.                                                |
| 90–81              | Good functioning in all four main areas, presence of only common problems or difficulties.                                                                                                                                                                   |
| 80–71              | Mild difficulties in 1 or more of areas a–c.                                                                                                                                                                                                                 |
| 70–61              | Manifest, but not marked difficulties in 1 or more areas a–c, or mild difficulties in d.                                                                                                                                                                     |
| 60–51              | Marked difficulties in 1 of areas a–c, or manifest difficulties in d.                                                                                                                                                                                        |
| 50–41              | Marked difficulties in 2 or more, or severe difficulties in 1 of areas a–c, with or without manifest difficulties in d.                                                                                                                                      |
| 40–31              | Severe difficulties in 1 and marked difficulties in at least 1 of areas a–c, or marked difficulties in d.                                                                                                                                                    |
| 30–21              | Severe difficulties in 2 of areas a–c, or severe difficulties in d, with or without impairment in areas a–c.                                                                                                                                                 |
| 20–11              | Severe difficulties in all areas a–d, or very severe in d with or without impairment in general areas a–c. If the person reacts to external prompts the suggested scores are 20–16, if not, the suggested scores are 15–11.                                  |
| 10–1               | Lack of autonomy in basic functioning with extreme behaviors but without survival risk (ratings 6–10) or with survival risk, eg, death risk due to malnutrition, dehydration, infections, inability to recognize situation of manifest danger (ratings 5–1). |

**For main areas a–c, the degrees of severity are:**

|                          |                                                                                                                                                                                                                                                                                          |
|--------------------------|------------------------------------------------------------------------------------------------------------------------------------------------------------------------------------------------------------------------------------------------------------------------------------------|
| Absent                   |                                                                                                                                                                                                                                                                                          |
| Mild                     | Not manifest difficulties, known only to someone who is very familiar with the person.                                                                                                                                                                                                   |
| Manifest, but not marked | Difficulties clearly noticeable by everyone, but not interfering substantially with the person's ability to perform his/her role in that area, given the person's socio-cultural context, age, sex and educational levels.                                                               |
| Marked                   | Difficulties heavily interfering with role performance in that area; however, the person is still able to do something without professional or social help, although inadequately and/or occasionally; if helped by someone, he/she may be able reach the previous level of functioning. |
| Severe                   | Difficulties that make the person unable to perform any role in that area, if not professionally helped, or lead the person to a destructive role; however, there are no survival risks.                                                                                                 |
| Very severe              | Impairments and difficulties of such intensity to endanger person's survival.                                                                                                                                                                                                            |

**For general area d, the degrees of severity are:**

|                          |                                                                                                                                                                                |
|--------------------------|--------------------------------------------------------------------------------------------------------------------------------------------------------------------------------|
| Absent                   |                                                                                                                                                                                |
| Mild                     | Mild rudeness, unsociability or whingeing.                                                                                                                                     |
| Manifest, but not marked | Speaking too loudly or speaking to others in a too-familiar manner, or eating in a socially unacceptable manner.                                                               |
| Marked                   | Insulting other in public, breaking or wrecking objects, acting frequently in a socially inappropriate but not dangerous way (eg, stripping in public or urinating in public). |
| Severe                   | Frequent verbal threats or frequent physical assaults, without intention or possibility of severe injuries.                                                                    |
| Very severe              | Frequent aggressive acts, aimed at or likely to cause severe injuries.                                                                                                         |

Occasional is defined as occurring three or more times in the reference period or occurring even less than three times but in circumstances and/or with such a previous history to convince the rater that there is a risk of recurrence in the near future. If the aggressive behavior has been present occasionally, the rating may be decreased by one degree, eg, from severe to marked.

\* Main areas: a = socially useful activities, including work and study; b = personal and social relationships; c = self-care; d = disturbing and aggressive behaviors.

**Guidelines for PSP Total Score**

Ratings from 71–100 reflect only mild difficulties.

Ratings from 31–70 reflect manifest disabilities of various degrees.

Ratings from 1–30 reflect functioning so poor that intensive support or supervision is needed.

## Supplemental Figure 5. Patient Activation Measure-Mental Health Scale

The following questions ask about your feelings regarding your mental healthcare. When you think about mental health and mental health care, how much do you agree or disagree with the following statements? Please circle the answer that you most agree with:

1. When all is said and done, I am the person who is responsible for managing my mental health.

|                   |          |       |                |
|-------------------|----------|-------|----------------|
| 1                 | 2        | 3     | 4              |
| Strongly Disagree | Disagree | Agree | Strongly Agree |

2. Taking an active role in my own mental health is the most important factor in determining my mental health and ability to function.

|                   |          |       |                |
|-------------------|----------|-------|----------------|
| 1                 | 2        | 3     | 4              |
| Strongly Disagree | Disagree | Agree | Strongly Agree |

3. I am confident that I can take actions that will help prevent or minimize some symptoms or problems associated with my mental health condition.

|                   |          |       |                |
|-------------------|----------|-------|----------------|
| 1                 | 2        | 3     | 4              |
| Strongly Disagree | Disagree | Agree | Strongly Agree |

4. I know what each of my prescribed mental health medications does.

|                   |          |       |                |
|-------------------|----------|-------|----------------|
| 1                 | 2        | 3     | 4              |
| Strongly Disagree | Disagree | Agree | Strongly Agree |

5. I am confident that I can tell when I need to go get mental health care, and when I can handle a mental health problem myself.

|                   |          |       |                |
|-------------------|----------|-------|----------------|
| 1                 | 2        | 3     | 4              |
| Strongly Disagree | Disagree | Agree | Strongly Agree |

6. I am confident I can tell my mental health clinician about concerns I have, even when he or she does not ask.

|                   |          |       |                |
|-------------------|----------|-------|----------------|
| 1                 | 2        | 3     | 4              |
| Strongly Disagree | Disagree | Agree | Strongly Agree |

**7. I am confident that I can follow through on mental health treatments I need to do at home.**

|                   |          |       |                |
|-------------------|----------|-------|----------------|
| 1                 | 2        | 3     | 4              |
| Strongly Disagree | Disagree | Agree | Strongly Agree |

**8. I understand the nature and causes of my mental health condition(s).**

|                   |          |       |                |
|-------------------|----------|-------|----------------|
| 1                 | 2        | 3     | 4              |
| Strongly Disagree | Disagree | Agree | Strongly Agree |

**9. I know the different treatment options available for my mental health condition(s).**

|                   |          |       |                |
|-------------------|----------|-------|----------------|
| 1                 | 2        | 3     | 4              |
| Strongly Disagree | Disagree | Agree | Strongly Agree |

**10. I am able to maintain the lifestyle changes I have made for my mental health.**

|                   |          |       |                |
|-------------------|----------|-------|----------------|
| 1                 | 2        | 3     | 4              |
| Strongly Disagree | Disagree | Agree | Strongly Agree |

**11. I know how to prevent further mental health problems.**

|                   |          |       |                |
|-------------------|----------|-------|----------------|
| 1                 | 2        | 3     | 4              |
| Strongly Disagree | Disagree | Agree | Strongly Agree |

**12. I am confident I can figure out solutions when new situations or problems arise with my mental health.**

|                   |          |       |                |
|-------------------|----------|-------|----------------|
| 1                 | 2        | 3     | 4              |
| Strongly Disagree | Disagree | Agree | Strongly Agree |

**13. I am confident that I can maintain lifestyle changes, like diet and exercise, even during times of stress.**

|                   |          |       |                |
|-------------------|----------|-------|----------------|
| 1                 | 2        | 3     | 4              |
| Strongly Disagree | Disagree | Agree | Strongly Agree |
